# Supplementary material for: Landscape of cancer biomarker testing in England following genomic services reconfiguration: insights from a nationwide pathologist survey
Source: PubMed Central journal article supplement — J Clin Pathol. 2023 May 31;77(7):486–94. doi: 10.1136/jcp-2023-208890 (PMC11228219; doi:10.1136/jcp-2023-208890), 2023-05-31
Supplement: jcp-2023-208890supp001.pdf [file jcp-2023-208890supp001.pdf]

***The landscape of cancer biomarker testing in England following genomic reconfiguration: Insights from a nationwide pathologist survey***

Phillipe Taniere<sup>1</sup>, Andrew G. Nicholson<sup>2</sup>, John Gosney<sup>3</sup>, Angeles Montero<sup>4</sup>, Danielle Bury<sup>5</sup>, David Moore<sup>6</sup>, Eldo Verghese<sup>7</sup>, Emily Shaw<sup>8</sup>, Irshad Soomro<sup>9</sup>, Leena Joseph<sup>10</sup>, Nidhi Bhatt<sup>11</sup>, Patrizia Viola<sup>12</sup>, Rozinder Bains<sup>13</sup>, Adrienne G. Lanctot<sup>13</sup>, Jacqueline Ryan<sup>13</sup>

<sup>1</sup>Department of Histopathology, University Hospitals Birmingham NHS Foundation Trust, Birmingham, United Kingdom

<sup>2</sup>Department of Histopathology, Royal Brompton and Harefield Hospitals, Guy's and St Thomas' NHS Foundation Trust; Honorary Professor of Respiratory Pathology, National Heart and Lung Institute, Imperial College, London, United Kingdom

<sup>3</sup>Department of Cellular Pathology, Royal Liverpool University Hospital, Liverpool, United Kingdom

<sup>4</sup>Department of Histopathology, Manchester University Foundation Trust, Manchester, United Kingdom

<sup>5</sup>Blackpool Teaching Hospitals NHS Foundation Trust, Blackpool; Department of Cellular Pathology, Royal Liverpool University Hospital, Liverpool, United Kingdom

<sup>6</sup>Cancer Research UK Lung Cancer Centre of Excellence, UCL Cancer Institute, London; Department of Cellular Pathology, University College London Hospital NHS Foundation Trust, London, United Kingdom

<sup>7</sup>Department of Histopathology, St James University Hospital, Leeds LS9 7TF, United Kingdom

<sup>8</sup>Department of Histopathology, University Hospital Southampton NHS Foundation Trust, Southampton, United Kingdom

<sup>9</sup>Department of Histopathology, Nottingham University Hospital, Nottingham, United Kingdom

<sup>10</sup>Consultant Histopathologist, Honorary Lecturer, Manchester Medical School, Deputy Clinical Head of Division of Laboratory Medicine, Manchester Foundation Trust, Manchester, United Kingdom

<sup>11</sup>Cellular Pathology Department, North Bristol NHS Trust, Bristol, United Kingdom

<sup>12</sup>North West London Pathology based at Imperial College Healthcare NHS Trust, Charing Cross Hospital, London, United Kingdom

<sup>13</sup>Novartis Pharmaceuticals UK Ltd, London, United Kingdom

**Address for Correspondence:**

Dr. Phillipe Taniere  
Consultant Histopathologist/Molecular Pathology  
CLS/Cellular Pathology/Office 54  
Histopathology - University Hospitals Birmingham NHS Foundation Trust, Birmingham,  
B15 2TH, United Kingdom  
Email: [Phillipe.Taniere@uhb.nhs.uk](mailto:Phillipe.Taniere@uhb.nhs.uk)

**Supplementary Online Material****Table S1. Estimated samples received per month**

| Cancer type   | Estimated number of samples received per month at all centres |        |            |
|---------------|---------------------------------------------------------------|--------|------------|
|               | N*                                                            | Median | IQR        |
| Breast cancer | 8                                                             | 130    | 40 to 425  |
| Lung cancer   | 15                                                            | 65     | 30 to 100  |
| Melanoma skin | 8                                                             | 52.5   | 20 to 105  |
| Other cancers | 3                                                             | 150    | 125 to 225 |

\*Seven respondents were not able to provide the estimates for breast cancer and melanoma skin respectively; 12 respondents were not able to provide the estimates for other cancers.

IQR, interquartile range; N, number of respondents.

**Supplementary figures****Figure S1. Regional GLH (n=15) of survey respondents**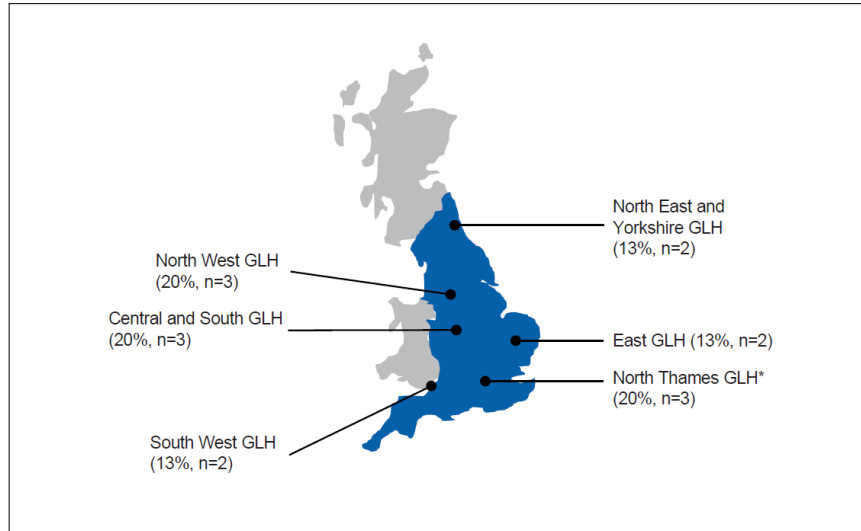

\*n=1 also used the Central and South GLH  
GLH, genomic laboratory hub; n, number of respondents.

**Figure S2. Technologies in use by the respondents**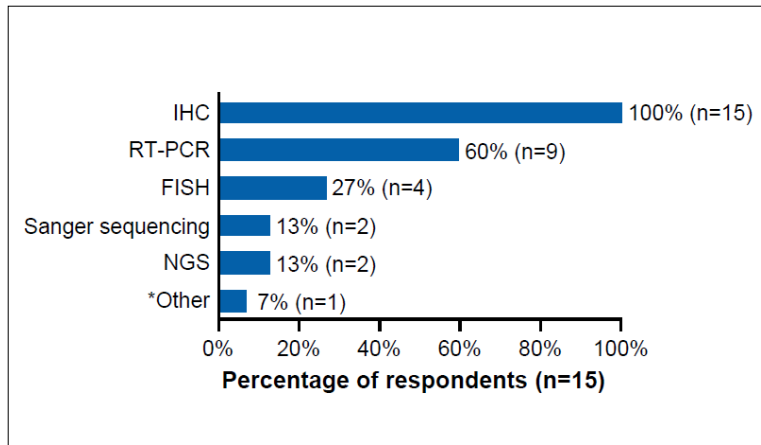

\*Other included Pyrosequencing and digital-based (AI) assessment of proteins; Responses are not mutually exclusive.

AI, artificial intelligence; FISH, fluorescence in situ hybridization; IHC, immunohistochemistry; NGS, next-generation sequencing; n, number of respondents; RT-PCR, real-time polymerase chain reaction.

**Figure S3. Challenges with use of archival tissue**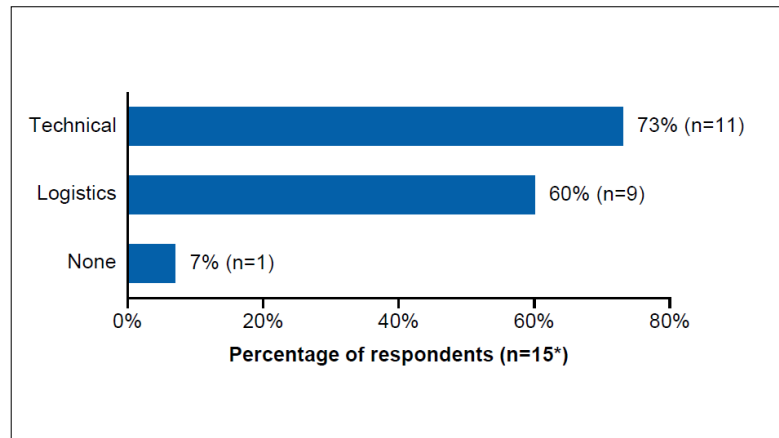

\*Responses were not mutually exclusive.

n, number of respondents.

Technical challenges included sample quality, sample quantity and failure rates.

Logistical challenges included additional administrative resources, loss of sample, difficulty with retrieval, cost and turnaround time.

**Figure S4A. Point of contact in the clinic**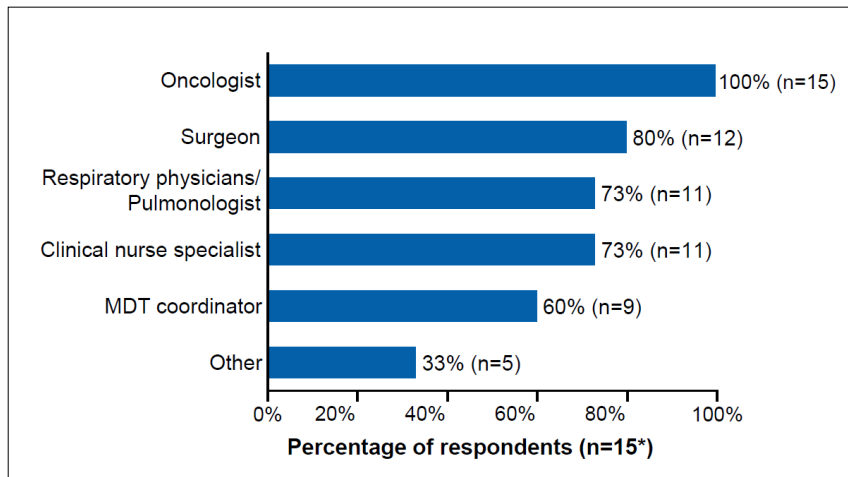

Other included dermatologists (n=3), pathologists (n=1), radiologists (n=1);  
\*Responses are not mutually exclusive.  
n, number of respondents.

**Figure S4B. Communication with the clinicians**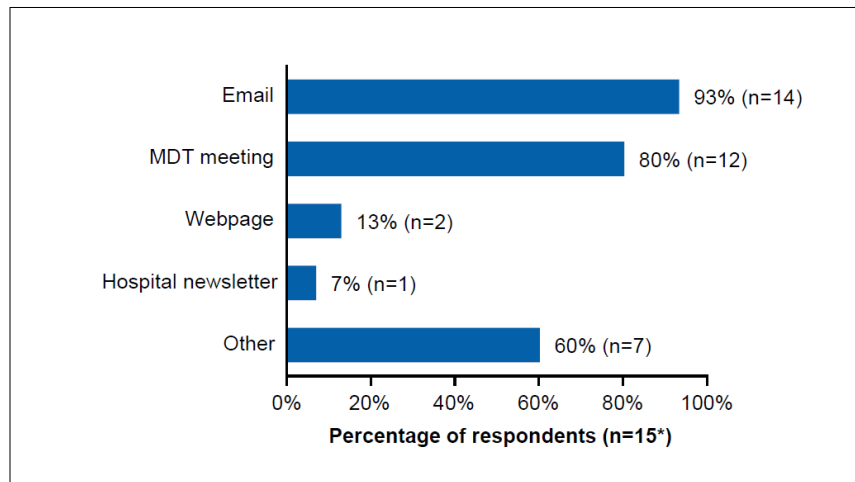

Other included focus groups (n=1), educational webinars (n=1), informal discussions (n=4), conferences (n=1), meetings (n=1) and phone (n=2).  
\*Responses are not mutually exclusive.  
n, number of respondents.

**Figure S5. Perceived impact of COVID-19 on the current services**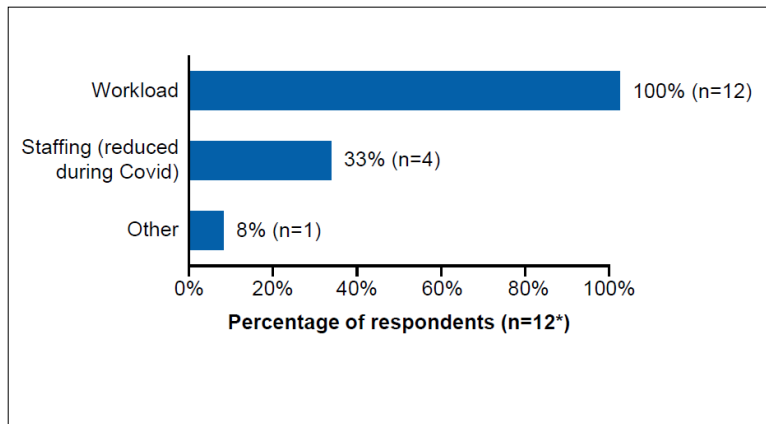

\*Responses are not mutually exclusive; 3 respondents were not able to provide responses. n, number of respondents.

**Figure S6. Role of regional pathology centres in the optimal delivery of the GMS**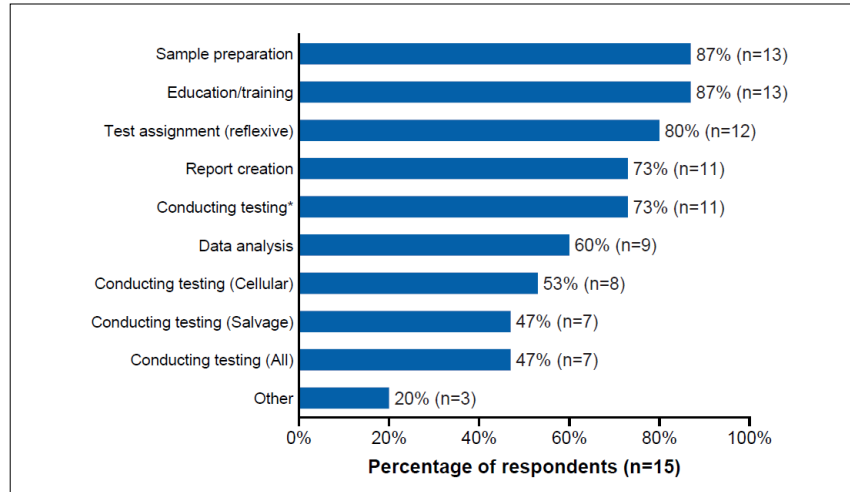

\*Urgent or first-line testing.

Responses are not mutually exclusive.

Other included integrate diagnostic information from different sources, provide prognostic and predictive factors on timely basis and unclear role (n=1 each).

GMS, genomic medicine service; n, number of respondents.



**Figure S7. Additional resources required at local pathology to support optimal delivery of the GMS**

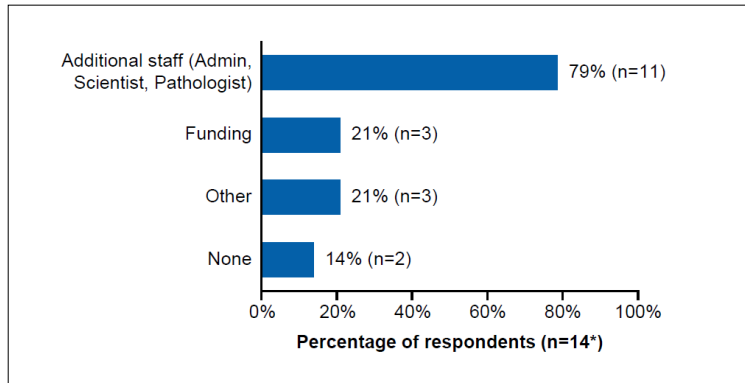

Other included improved IT efficiency (sample tracking and reports), improved communication, educational support.

\*Responses are not mutually exclusive; 1 respondent was unable to provide a response.  
n, number of respondents.

**Figure S8. Educational support methods preferred by the respondents**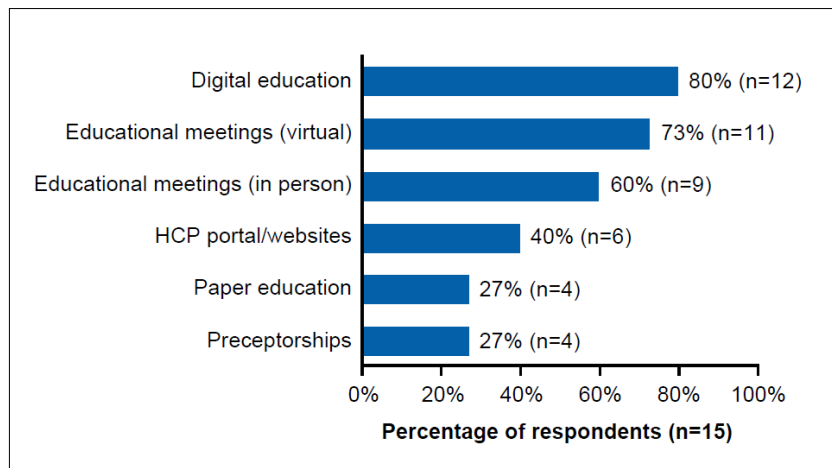

Responses are not mutually exclusive.

HCP, healthcare practitioners; n, number of respondents.
