# Supplementary material for: Landscape of cancer biomarker testing in England following genomic services reconfiguration: insights from a nationwide pathologist survey
Source: PubMed Central journal article supplement — J Clin Pathol. 2023 May 31;77(7):486–94. doi: 10.1136/jcp-2023-208890 (PMC11228219; doi:10.1136/jcp-2023-208890), 2023-05-31
Supplement: jcp-2023-208890supp002.pdf [file jcp-2023-208890supp002.pdf]

| <b>Abbreviations</b> |                                               |
|----------------------|-----------------------------------------------|
| SD                   | Standard deviation                            |
| IQR                  | Interquartile range (first to third quartile) |
| NA.                  | Missing data                                  |
| N/A                  | Not applicable                                |

## 2. Where in the UK is your Lab?

| 2. Where in the UK is your Lab? | Overall |            |
|---------------------------------|---------|------------|
|                                 | n       | % (N = 15) |
| England                         | 15      | 100%       |
| NA.                             | 0       | -          |

## 3. How would you categorise your hospital?

| 3. How would you categorise your hospital? | Overall |            |
|--------------------------------------------|---------|------------|
|                                            | n       | % (N = 15) |
| Other                                      | 1       | 7%         |
| Regional Centre                            | 14      | 93%        |
| NA.                                        | 0       | -          |

## 4. What region does your lab cover for diagnosis and management of cancer samples?

| 4. What region does your lab cover for diagnosis and management of cancer samples? | Overall |            |
|------------------------------------------------------------------------------------|---------|------------|
|                                                                                    | n       | % (N = 15) |
| Referral network                                                                   | 15      | 100%       |
| NA.                                                                                | 0       | -          |

## 4. Estimated population size (in million)

| 4. Estimated population size (in million) | Overall    |
|-------------------------------------------|------------|
|                                           | N = 15     |
| Mean                                      | 3.3        |
| SD                                        | 2.9        |
| Median                                    | 2.5        |
| IQR                                       | 1.9 to 3.6 |
| Range                                     | 1 to 12    |
| NA.                                       | 3          |

## 5. Which is your regional GLH or genomics centre?

| 5. Which is your regional GLH or genomics centre? | Overall |            |
|---------------------------------------------------|---------|------------|
|                                                   | n       | % (N = 15) |
| Central and South GLH                             | 3       | 20%        |
| Central and South GLH + North Thames GLH          | 1       | 7%         |
| East GLH                                          | 2       | 13%        |
| North East & Yorkshire GLH                        | 2       | 13%        |
| North Thames GLH                                  | 2       | 13%        |
| North West GLH                                    | 3       | 20%        |
| South West GLH                                    | 2       | 13%        |
| NA.                                               | 0       | -          |

## 6. IHC

| 6. IHC | Overall |            |
|--------|---------|------------|
|        | n       | % (N = 15) |
| Yes    | 15      | 100%       |
| NA.    | 0       | -          |

## 6. FISH

| 6. FISH | Overall |            |
|---------|---------|------------|
|         | n       | % (N = 15) |
| No      | 11      | 73%        |
| Yes     | 4       | 27%        |
| NA.     | 0       | -          |

## 6. RT-PCR

| 6. RT-PCR | Overall |            |
|-----------|---------|------------|
|           | n       | % (N = 15) |
| No        | 6       | 40%        |
| Yes       | 9       | 60%        |
| NA.       | 0       | -          |

## 6. Sanger Sequencing

| 6. Sanger Sequencing | Overall |            |
|----------------------|---------|------------|
|                      | n       | % (N = 15) |
| No                   | 13      | 87%        |
| Yes                  | 2       | 13%        |
| NA.                  | 0       | -          |

## 6. NGS

| 6. NGS | Overall |            |
|--------|---------|------------|
|        | n       | % (N = 15) |
| No     | 13      | 87%        |
| Yes    | 2       | 13%        |
| NA.    | 0       | -          |

## 6. Other

| 6. Other                                                    | Overall |           |
|-------------------------------------------------------------|---------|-----------|
|                                                             | n       | % (N = 1) |
| Pyro sequencing & digital based (AI) assessment of proteins | 1       | 100%      |
| NA.                                                         | 14      | -         |

## 7. Breast

| 7. Breast | Overall |
|-----------|---------|
|           | N = 15  |

|        |           |
|--------|-----------|
| Mean   | 234.4     |
| SD     | 229.8     |
| Median | 130       |
| IQR    | 40 to 425 |
| Range  | 35 to 600 |
| NA.    | 7         |

## 7. Lung

|         |           |
|---------|-----------|
| 7. Lung | Overall   |
|         | N = 15    |
| Mean    | 112.9     |
| SD      | 143.1     |
| Median  | 65        |
| IQR     | 30 to 100 |
| Range   | 20 to 500 |
| NA.     | 0         |

## 7. Melanoma Skin

|                  |           |
|------------------|-----------|
| 7. Melanoma Skin | Overall   |
|                  | N = 15    |
| Mean             | 87.9      |
| SD               | 96.7      |
| Median           | 52.5      |
| IQR              | 20 to 105 |
| Range            | 18 to 300 |
| NA.              | 7         |

## 7. Other Cancers

|                  |            |
|------------------|------------|
| 7. Other Cancers | Overall    |
|                  | N = 15     |
| Mean             | 183.3      |
| SD               | 104.1      |
| Median           | 150        |
| IQR              | 125 to 225 |
| Range            | 100 to 300 |
| NA.              | 12         |

## IHC: Reflex at diagnosis - HR

| IHC: Reflex at diagnosis - HR | Overall |           |
|-------------------------------|---------|-----------|
|                               | n       | % (N = 9) |
| Yes                           | 9       | 100%      |
| NA.                           | 0       | -         |

## IHC: Reflex at diagnosis - HER2

| IHC: Reflex at diagnosis - HER2 | Overall |           |
|---------------------------------|---------|-----------|
|                                 | n       | % (N = 9) |
| Yes                             | 9       | 100%      |
| NA.                             | 0       | -         |

## IHC: Reflex at diagnosis - PGR

| IHC: Reflex at diagnosis - PGR | Overall |           |
|--------------------------------|---------|-----------|
|                                | n       | % (N = 9) |
| On request                     | 1       | 11%       |
| Yes                            | 8       | 89%       |
| NA.                            | 0       | -         |

## IHC: Reflex at diagnosis - PD-L1

| IHC: Reflex at diagnosis - PD-L1 | Overall |           |
|----------------------------------|---------|-----------|
|                                  | n       | % (N = 9) |
| No                               | 2       | 22%       |
| On request                       | 4       | 44%       |
| Yes                              | 3       | 33%       |
| NA.                              | 0       | -         |

## IHC: Reflex at diagnosis - NTRKfus

| IHC: Reflex at diagnosis - NTRKfus | Overall |           |
|------------------------------------|---------|-----------|
|                                    | n       | % (N = 9) |
| No                                 | 5       | 56%       |
| On request                         | 4       | 44%       |
| NA.                                | 0       | -         |

IHC: Testing at progression/ relapse/  
other post Dx timepoints - HR

| IHC: Testing at progression/ relapse/<br>other post Dx timepoints - HR | Overall |           |
|------------------------------------------------------------------------|---------|-----------|
|                                                                        | n       | % (N = 9) |
| No                                                                     | 4       | 44%       |
| On request                                                             | 1       | 11%       |
| Yes                                                                    | 4       | 44%       |
| NA.                                                                    | 0       | -         |

IHC: Testing at progression/ relapse/  
other post Dx timepoints - HER2

| IHC: Testing at progression/ relapse/<br>other post Dx timepoints - HER2 | Overall |           |
|--------------------------------------------------------------------------|---------|-----------|
|                                                                          | n       | % (N = 9) |
| No                                                                       | 4       | 44%       |
| Yes                                                                      | 5       | 56%       |
| NA.                                                                      | 0       | -         |

IHC: Testing at progression/ relapse/  
other post Dx timepoints - PGR

| IHC: Testing at progression/ relapse/<br>other post Dx timepoints - PGR | Overall |           |
|-------------------------------------------------------------------------|---------|-----------|
|                                                                         | n       | % (N = 9) |
| No                                                                      | 4       | 44%       |
| Yes                                                                     | 5       | 56%       |
| NA.                                                                     | 0       | -         |

IHC: Testing at progression/ relapse/  
other post Dx timepoints - PD-L1

| IHC: Testing at progression/ relapse/<br>other post Dx timepoints - PD-L1 | Overall |           |
|---------------------------------------------------------------------------|---------|-----------|
|                                                                           | n       | % (N = 9) |
| No                                                                        | 3       | 33%       |
| On request                                                                | 3       | 33%       |
| Yes                                                                       | 3       | 33%       |
| NA.                                                                       | 0       | -         |

IHC: Testing at progression/ relapse/  
other post Dx timepoints - NTRKfus

| IHC: Testing at progression/ relapse/<br>other post Dx timepoints - NTRKfus | Overall |           |
|-----------------------------------------------------------------------------|---------|-----------|
|                                                                             | n       | % (N = 9) |
| No                                                                          | 5       | 56%       |
| On request                                                                  | 4       | 44%       |
| NA.                                                                         | 0       | -         |

IHC: Performed by pathology lab - HR

| IHC: Performed by pathology lab - HR | Overall |           |
|--------------------------------------|---------|-----------|
|                                      | n       | % (N = 9) |
| Yes                                  | 9       | 100%      |
| NA.                                  | 0       | -         |

IHC: Performed by pathology lab -  
HER2

| IHC: Performed by pathology lab -<br>HER2 | Overall |           |
|-------------------------------------------|---------|-----------|
|                                           | n       | % (N = 9) |
| Other external lab                        | 2       | 22%       |
| Yes                                       | 7       | 78%       |
| NA.                                       | 0       | -         |

IHC: Performed by pathology lab -  
PGR

| IHC: Performed by pathology lab -<br>PGR | Overall |           |
|------------------------------------------|---------|-----------|
|                                          | n       | % (N = 9) |
| Yes                                      | 9       | 100%      |
| NA.                                      | 0       | -         |

IHC: Performed by pathology lab - PD-  
L1

| IHC: Performed by pathology lab - PD-<br>L1 | Overall |           |
|---------------------------------------------|---------|-----------|
|                                             | n       | % (N = 8) |
| Other external lab                          | 2       | 25%       |

|     |   |     |
|-----|---|-----|
| Yes | 6 | 75% |
| NA. | 1 | -   |

IHC: Performed by pathology lab -  
NTRKfus

| IHC: Performed by pathology lab -<br>NTRKfus | Overall |           |
|----------------------------------------------|---------|-----------|
|                                              | n       | % (N = 4) |
| No                                           | 2       | 50%       |
| Other external lab                           | 1       | 25%       |
| Yes                                          | 1       | 25%       |
| NA.                                          | 5       | -         |

IHC: Moved to GLH/ Genomic centre -  
HR

| IHC: Moved to GLH/ Genomic centre -<br>HR | Overall |           |
|-------------------------------------------|---------|-----------|
|                                           | n       | % (N = 9) |
| No                                        | 9       | 100%      |
| NA.                                       | 0       | -         |

IHC: Moved to GLH/ Genomic centre -  
HER2

| IHC: Moved to GLH/ Genomic centre -<br>HER2 | Overall |           |
|---------------------------------------------|---------|-----------|
|                                             | n       | % (N = 9) |
| No                                          | 9       | 100%      |
| NA.                                         | 0       | -         |

IHC: Moved to GLH/ Genomic centre -  
PGR

| IHC: Moved to GLH/ Genomic centre -<br>PGR | Overall |           |
|--------------------------------------------|---------|-----------|
|                                            | n       | % (N = 9) |
| No                                         | 9       | 100%      |
| NA.                                        | 0       | -         |

IHC: Moved to GLH/ Genomic centre -  
PD-L1



| IHC: Moved to GLH/ Genomic centre - PD-L1 | Overall |           |
|-------------------------------------------|---------|-----------|
|                                           | n       | % (N = 8) |
| No                                        | 8       | 100%      |
| NA.                                       | 1       | -         |

IHC: Moved to GLH/ Genomic centre - NTRKfus

| IHC: Moved to GLH/ Genomic centre - NTRKfus | Overall |           |
|---------------------------------------------|---------|-----------|
|                                             | n       | % (N = 4) |
| No                                          | 2       | 50%       |
| Yes                                         | 2       | 50%       |
| NA.                                         | 5       | -         |

IHC: Moving to GLH/ Genomic hubs - HR

| IHC: Moving to GLH/ Genomic hubs - HR | Overall |           |
|---------------------------------------|---------|-----------|
|                                       | n       | % (N = 9) |
| No                                    | 9       | 100%      |
| NA.                                   | 0       | -         |

IHC: Moving to GLH/ Genomic hubs - HER2

| IHC: Moving to GLH/ Genomic hubs - HER2 | Overall |           |
|-----------------------------------------|---------|-----------|
|                                         | n       | % (N = 9) |
| No                                      | 9       | 100%      |
| NA.                                     | 0       | -         |

IHC: Moving to GLH/ Genomic hubs - PGR

| IHC: Moving to GLH/ Genomic hubs - PGR | Overall |           |
|----------------------------------------|---------|-----------|
|                                        | n       | % (N = 9) |
| No                                     | 9       | 100%      |
| NA.                                    | 0       | -         |

IHC: Moving to GLH/ Genomic hubs - PD-L1

| IHC: Moving to GLH/ Genomic hubs - PD-L1 | Overall |           |
|------------------------------------------|---------|-----------|
|                                          | n       | % (N = 8) |
| No                                       | 8       | 100%      |
| NA.                                      | 1       | -         |

IHC: Moving to GLH/ Genomic hubs - NTRKfus

| IHC: Moving to GLH/ Genomic hubs - NTRKfus | Overall |           |
|--------------------------------------------|---------|-----------|
|                                            | n       | % (N = 4) |
| No                                         | 4       | 100%      |
| NA.                                        | 5       | -         |

IHC: Current Average Turnaround time - HR

| IHC: Current Average Turnaround time - HR | Overall  |
|-------------------------------------------|----------|
|                                           | N = 9    |
| Mean                                      | 2.1      |
| SD                                        | 0.6      |
| Median                                    | 2        |
| IQR                                       | 2 to 2.2 |
| Range                                     | 1 to 3   |
| NA.                                       | 1        |

IHC: Current Average Turnaround time - HER2

| IHC: Current Average Turnaround time - HER2 | Overall  |
|---------------------------------------------|----------|
|                                             | N = 9    |
| Mean                                        | 2.9      |
| SD                                          | 1.1      |
| Median                                      | 2.8      |
| IQR                                         | 2 to 3.2 |
| Range                                       | 2 to 5   |
| NA.                                         | 1        |

IHC: Current Average Turnaround time - PGR

| IHC: Current Average Turnaround time - PGR | Overall |
|--------------------------------------------|---------|
|                                            | N = 9   |
| Mean                                       | 2.2     |

|        |          |
|--------|----------|
| SD     | 0.7      |
| Median | 2        |
| IQR    | 2 to 2.6 |
| Range  | 1 to 3   |
| NA.    | 1        |

IHC: Current Average Turnaround time - PD-L1

| IHC: Current Average Turnaround time - PD-L1 | Overall     |
|----------------------------------------------|-------------|
|                                              | N = 9       |
| Mean                                         | 8.7         |
| SD                                           | 10.6        |
| Median                                       | 3           |
| IQR                                          | 2.2 to 11.2 |
| Range                                        | 1 to 30     |
| NA.                                          | 2           |

IHC: Current Average Turnaround time - NTRKfus

| IHC: Current Average Turnaround time - NTRKfus | Overall      |
|------------------------------------------------|--------------|
|                                                | N = 9        |
| Mean                                           | 19           |
| SD                                             | 10.1         |
| Median                                         | 19.2         |
| IQR                                            | 12.4 to 25.9 |
| Range                                          | 7.5 to 30    |
| NA.                                            | 5            |

FISH: Reflex at diagnosis - HER2

| FISH: Reflex at diagnosis - HER2 | Overall |           |
|----------------------------------|---------|-----------|
|                                  | n       | % (N = 9) |
| No                               | 1       | 11%       |
| On request                       | 2       | 22%       |
| Yes                              | 6       | 67%       |
| NA.                              | 0       | -         |

FISH: Reflex at diagnosis - NTRKfus

| FISH: Reflex at diagnosis - NTRKfus | Overall |           |
|-------------------------------------|---------|-----------|
|                                     | n       | % (N = 9) |
| No                                  | 6       | 67%       |
| On request                          | 3       | 33%       |
| NA.                                 | 0       | -         |

FISH: Testing at progression/ relapse/  
other post Dx timepoints - HER2

| FISH: Testing at progression/ relapse/<br>other post Dx timepoints - HER2 | Overall |           |
|---------------------------------------------------------------------------|---------|-----------|
|                                                                           | n       | % (N = 9) |
| No                                                                        | 5       | 56%       |
| On request                                                                | 1       | 11%       |
| Yes                                                                       | 3       | 33%       |
| NA.                                                                       | 0       | -         |

FISH: Testing at progression/ relapse/  
other post Dx timepoints - NTRKfus

| FISH: Testing at progression/ relapse/<br>other post Dx timepoints - NTRKfus | Overall |           |
|------------------------------------------------------------------------------|---------|-----------|
|                                                                              | n       | % (N = 9) |
| No                                                                           | 5       | 56%       |
| On request                                                                   | 3       | 33%       |
| Yes                                                                          | 1       | 11%       |
| NA.                                                                          | 0       | -         |

FISH: Performed by pathology lab -  
HER2

| FISH: Performed by pathology lab -<br>HER2 | Overall |           |
|--------------------------------------------|---------|-----------|
|                                            | n       | % (N = 8) |
| No                                         | 3       | 38%       |
| Other external lab                         | 1       | 12%       |
| Yes                                        | 4       | 50%       |
| NA.                                        | 1       | -         |

FISH: Performed by pathology lab -  
NTRKfus

| FISH: Performed by pathology lab -<br>NTRKfus | Overall |           |
|-----------------------------------------------|---------|-----------|
|                                               | n       | % (N = 4) |
| No                                            | 3       | 75%       |
| Other external lab                            | 1       | 25%       |
| NA.                                           | 5       | -         |

FISH: Moved to GLH/ Genomic centre  
- HER2

| FISH: Moved to GLH/ Genomic centre<br>- HER2 | Overall |           |
|----------------------------------------------|---------|-----------|
|                                              | n       | % (N = 8) |
| No                                           | 5       | 62%       |
| Yes                                          | 3       | 38%       |
| NA.                                          | 1       | -         |

FISH: Moved to GLH/ Genomic centre  
- NTRKfus

| FISH: Moved to GLH/ Genomic centre<br>- NTRKfus | Overall |           |
|-------------------------------------------------|---------|-----------|
|                                                 | n       | % (N = 4) |
| No                                              | 1       | 25%       |
| Yes                                             | 3       | 75%       |
| NA.                                             | 5       | -         |

FISH: Moving to GLH/ Genomic hubs -  
HER2

| FISH: Moving to GLH/ Genomic hubs -<br>HER2 | Overall |           |
|---------------------------------------------|---------|-----------|
|                                             | n       | % (N = 8) |
| No                                          | 8       | 100%      |
| NA.                                         | 1       | -         |

FISH: Moving to GLH/ Genomic hubs -  
NTRKfus

| FISH: Moving to GLH/ Genomic hubs -<br>NTRKfus | Overall |           |
|------------------------------------------------|---------|-----------|
|                                                | n       | % (N = 4) |
| No                                             | 4       | 100%      |
| NA.                                            | 5       | -         |

FISH: Current Average Turnaround  
time - HER2

| FISH: Current Average Turnaround<br>time - HER2 | Overall |
|-------------------------------------------------|---------|
|                                                 | N = 9   |

|        |             |
|--------|-------------|
| Mean   | 7.2         |
| SD     | 4.5         |
| Median | 7           |
| IQR    | 3.5 to 10.2 |
| Range  | 2 to 14     |
| NA.    | 2           |

FISH: Current Average Turnaround time - NTRKfus

| FISH: Current Average Turnaround time - NTRKfus | Overall      |
|-------------------------------------------------|--------------|
|                                                 | N = 9        |
| Mean                                            | 23.2         |
| SD                                              | 6.7          |
| Median                                          | 24.5         |
| IQR                                             | 21.9 to 25.9 |
| Range                                           | 14 to 30     |
| NA.                                             | 5            |

RT-PCR: Reflex at diagnosis - PIK3CA

| RT-PCR: Reflex at diagnosis - PIK3CA | Overall |           |
|--------------------------------------|---------|-----------|
|                                      | n       | % (N = 9) |
| No                                   | 6       | 67%       |
| On request                           | 3       | 33%       |
| NA.                                  | 0       | -         |

RT-PCR: Reflex at diagnosis - BRCA 1/2

| RT-PCR: Reflex at diagnosis - BRCA 1/2 | Overall |           |
|----------------------------------------|---------|-----------|
|                                        | n       | % (N = 9) |
| No                                     | 8       | 89%       |
| Yes                                    | 1       | 11%       |
| NA.                                    | 0       | -         |

RT-PCR: Reflex at diagnosis - NTRKfus

| RT-PCR: Reflex at diagnosis - NTRKfus | Overall |           |
|---------------------------------------|---------|-----------|
|                                       | n       | % (N = 9) |
| No                                    | 6       | 67%       |
| On request                            | 3       | 33%       |
| NA.                                   | 0       | -         |

RT-PCR: Testing at progression/  
relapse/ other post Dx timepoints -  
PIK3CA

| RT-PCR: Testing at progression/<br>relapse/ other post Dx timepoints -<br>PIK3CA | Overall |           |
|----------------------------------------------------------------------------------|---------|-----------|
|                                                                                  | n       | % (N = 9) |
| No                                                                               | 7       | 78%       |
| On request                                                                       | 2       | 22%       |
| NA.                                                                              | 0       | -         |

RT-PCR: Testing at progression/  
relapse/ other post Dx timepoints -  
BRCA 1/2

| RT-PCR: Testing at progression/<br>relapse/ other post Dx timepoints -<br>BRCA 1/2 | Overall |           |
|------------------------------------------------------------------------------------|---------|-----------|
|                                                                                    | n       | % (N = 9) |
| No                                                                                 | 8       | 89%       |
| Yes                                                                                | 1       | 11%       |
| NA.                                                                                | 0       | -         |

RT-PCR: Testing at progression/  
relapse/ other post Dx timepoints -  
NTRKfus

| RT-PCR: Testing at progression/<br>relapse/ other post Dx timepoints -<br>NTRKfus | Overall |           |
|-----------------------------------------------------------------------------------|---------|-----------|
|                                                                                   | n       | % (N = 9) |
| No                                                                                | 6       | 67%       |
| On request                                                                        | 3       | 33%       |
| NA.                                                                               | 0       | -         |

RT-PCR: Performed by pathology lab -  
PIK3CA+BE4

| RT-PCR: Performed by pathology lab -<br>PIK3CA+BE4 | Overall |           |
|----------------------------------------------------|---------|-----------|
|                                                    | n       | % (N = 4) |
| No                                                 | 3       | 75%       |
| Yes                                                | 1       | 25%       |
| NA.                                                | 5       | -         |

RT-PCR: Performed by pathology lab -  
BRCA 1/2

| RT-PCR: Performed by pathology lab -<br>BRCA 1/2 | Overall |           |
|--------------------------------------------------|---------|-----------|
|                                                  | n       | % (N = 2) |
| No                                               | 2       | 100%      |
| NA.                                              | 7       | -         |

RT-PCR: Performed by pathology lab -  
NTRKfus

| RT-PCR: Performed by pathology lab -<br>NTRKfus | Overall |           |
|-------------------------------------------------|---------|-----------|
|                                                 | n       | % (N = 4) |
| No                                              | 3       | 75%       |
| Yes                                             | 1       | 25%       |
| NA.                                             | 5       | -         |

RT-PCR: Moved to GLH/ Genomic  
centre - PIK3CA

| RT-PCR: Moved to GLH/ Genomic<br>centre - PIK3CA | Overall |           |
|--------------------------------------------------|---------|-----------|
|                                                  | n       | % (N = 4) |
| No                                               | 1       | 25%       |
| Yes                                              | 3       | 75%       |
| NA.                                              | 5       | -         |

RT-PCR: Moved to GLH/ Genomic  
centre - BRCA 1/2

| RT-PCR: Moved to GLH/ Genomic<br>centre - BRCA 1/2 | Overall |           |
|----------------------------------------------------|---------|-----------|
|                                                    | n       | % (N = 2) |
| Yes                                                | 2       | 100%      |
| NA.                                                | 7       | -         |

RT-PCR: Moved to GLH/ Genomic  
centre - NTRKfus

| RT-PCR: Moved to GLH/ Genomic<br>centre - NTRKfus | Overall |           |
|---------------------------------------------------|---------|-----------|
|                                                   | n       | % (N = 4) |
| No                                                | 1       | 25%       |



|     |   |     |
|-----|---|-----|
| Yes | 3 | 75% |
| NA. | 5 | -   |

RT-PCR: Moving to GLH/ Genomic hubs - PIK3CA

| RT-PCR: Moving to GLH/ Genomic hubs - PIK3CA | Overall |           |
|----------------------------------------------|---------|-----------|
|                                              | n       | % (N = 4) |
| No                                           | 4       | 100%      |
| NA.                                          | 5       | -         |

RT-PCR: Moving to GLH/ Genomic hubs - BRCA 1/2

| RT-PCR: Moving to GLH/ Genomic hubs - BRCA 1/2 | Overall |           |
|------------------------------------------------|---------|-----------|
|                                                | n       | % (N = 2) |
| No                                             | 2       | 100%      |
| NA.                                            | 7       | -         |

RT-PCR: Moving to GLH/ Genomic hubs - NTRKfus

| RT-PCR: Moving to GLH/ Genomic hubs - NTRKfus | Overall |           |
|-----------------------------------------------|---------|-----------|
|                                               | n       | % (N = 4) |
| No                                            | 4       | 100%      |
| NA.                                           | 5       | -         |

RT-PCR: Current Average Turnaround time - PIK3CA

| RT-PCR: Current Average Turnaround time - PIK3CA | Overall    |
|--------------------------------------------------|------------|
|                                                  | N = 9      |
| Mean                                             | 17.2       |
| SD                                               | 11.6       |
| Median                                           | 14         |
| IQR                                              | 10.8 to 22 |
| Range                                            | 7.5 to 30  |
| NA.                                              | 6          |

RT-PCR: Current Average Turnaround time - BRCA 1/2

| RT-PCR: Current Average Turnaround time - BRCA 1/2 | Overall  |
|----------------------------------------------------|----------|
|                                                    | N = 9    |
| Mean                                               | 15       |
| SD                                                 |          |
| Median                                             | 15       |
| IQR                                                | 15 to 15 |
| Range                                              | 15 to 15 |
| NA.                                                | 8        |

RT-PCR: Current Average Turnaround time - NTRKfus

| RT-PCR: Current Average Turnaround time - NTRKfus | Overall      |
|---------------------------------------------------|--------------|
|                                                   | N = 9        |
| Mean                                              | 17.5         |
| SD                                                | 11.5         |
| Median                                            | 15           |
| IQR                                               | 11.2 to 22.5 |
| Range                                             | 7.5 to 30    |
| NA.                                               | 6            |

NGS: Reflex at diagnosis - PIK3CA

| NGS: Reflex at diagnosis - PIK3CA | Overall |           |
|-----------------------------------|---------|-----------|
|                                   | n       | % (N = 9) |
| No                                | 7       | 78%       |
| On request                        | 1       | 11%       |
| Test Done - Timeline unknown      | 1       | 11%       |
| NA.                               | 0       | -         |

NGS: Reflex at diagnosis - HER2

| NGS: Reflex at diagnosis - HER2 | Overall |           |
|---------------------------------|---------|-----------|
|                                 | n       | % (N = 9) |
| No                              | 8       | 89%       |
| Test Done - Timeline unknown    | 1       | 11%       |
| NA.                             | 0       | -         |

NGS: Reflex at diagnosis - NTRKfus

| NGS: Reflex at diagnosis - NTRKfus | Overall |           |
|------------------------------------|---------|-----------|
|                                    | n       | % (N = 9) |
| No                                 | 5       | 56%       |

|                              |   |     |
|------------------------------|---|-----|
| On request                   | 2 | 22% |
| Test Done - Timeline unknown | 1 | 11% |
| Yes                          | 1 | 11% |
| NA.                          | 0 | -   |

## NGS: Reflex at diagnosis - BRCA 1/2

| NGS: Reflex at diagnosis - BRCA 1/2 | Overall |           |
|-------------------------------------|---------|-----------|
|                                     | n       | % (N = 9) |
| No                                  | 6       | 67%       |
| On request                          | 2       | 22%       |
| Test Done - Timeline unknown        | 1       | 11%       |
| NA.                                 | 0       | -         |

NGS: Testing at progression/ relapse/  
other post Dx timepoints - PIK3CA

| NGS: Testing at progression/ relapse/<br>other post Dx timepoints - PIK3CA | Overall |           |
|----------------------------------------------------------------------------|---------|-----------|
|                                                                            | n       | % (N = 9) |
| No                                                                         | 7       | 78%       |
| On request                                                                 | 1       | 11%       |
| Test Done - Timeline unknown                                               | 1       | 11%       |
| NA.                                                                        | 0       | -         |

NGS: Testing at progression/ relapse/  
other post Dx timepoints - HER2

| NGS: Testing at progression/ relapse/<br>other post Dx timepoints - HER2 | Overall |           |
|--------------------------------------------------------------------------|---------|-----------|
|                                                                          | n       | % (N = 9) |
| No                                                                       | 8       | 89%       |
| Test Done - Timeline unknown                                             | 1       | 11%       |
| NA.                                                                      | 0       | -         |

NGS: Testing at progression/ relapse/  
other post Dx timepoints - NTRKfus

| NGS: Testing at progression/ relapse/<br>other post Dx timepoints - NTRKfus | Overall |           |
|-----------------------------------------------------------------------------|---------|-----------|
|                                                                             | n       | % (N = 9) |
| No                                                                          | 4       | 44%       |
| On request                                                                  | 2       | 22%       |
| Test Done - Timeline unknown                                                | 1       | 11%       |
| Yes                                                                         | 2       | 22%       |
| NA.                                                                         | 0       | -         |

NGS: Testing at progression/ relapse/  
other post Dx timepoints - BRCA 1/2

| NGS: Testing at progression/ relapse/<br>other post Dx timepoints - BRCA 1/2 | Overall |           |
|------------------------------------------------------------------------------|---------|-----------|
|                                                                              | n       | % (N = 9) |
| No                                                                           | 5       | 56%       |
| On request                                                                   | 2       | 22%       |
| Test Done - Timeline unknown                                                 | 1       | 11%       |
| Yes                                                                          | 1       | 11%       |
| NA.                                                                          | 0       | -         |

NGS: Performed by pathology lab -  
PIK3CA

| NGS: Performed by pathology lab -<br>PIK3CA | Overall |           |
|---------------------------------------------|---------|-----------|
|                                             | n       | % (N = 2) |
| No                                          | 2       | 100%      |
| NA.                                         | 7       | -         |

NGS: Performed by pathology lab -  
HER2

| NGS: Performed by pathology lab -<br>HER2 | Overall |           |
|-------------------------------------------|---------|-----------|
|                                           | n       | % (N = 1) |
| No                                        | 1       | 100%      |
| NA.                                       | 8       | -         |

NGS: Performed by pathology lab -  
NTRKfus

| NGS: Performed by pathology lab -<br>NTRKfus | Overall |  |
|----------------------------------------------|---------|--|
|----------------------------------------------|---------|--|

|     | n | % (N = 5) |
|-----|---|-----------|
| No  | 4 | 80%       |
| Yes | 1 | 20%       |
| NA. | 4 | -         |

NGS: Performed by pathology lab -  
BRCA 1/2

| NGS: Performed by pathology lab -<br>BRCA 1/2 | Overall |           |
|-----------------------------------------------|---------|-----------|
|                                               | n       | % (N = 4) |
| No                                            | 4       | 100%      |
| NA.                                           | 5       | -         |

NGS: Moved to GLH/ Genomic centre -  
PIK3CA

| NGS: Moved to GLH/ Genomic centre -<br>PIK3CA | Overall |           |
|-----------------------------------------------|---------|-----------|
|                                               | n       | % (N = 2) |
| Yes                                           | 2       | 100%      |
| NA.                                           | 7       | -         |

NGS: Moved to GLH/ Genomic centre -  
HER2

| NGS: Moved to GLH/ Genomic centre -<br>HER2 | Overall |           |
|---------------------------------------------|---------|-----------|
|                                             | n       | % (N = 1) |
| Yes                                         | 1       | 100%      |
| NA.                                         | 8       | -         |

NGS: Moved to GLH/ Genomic centre -  
NTRKfus

| NGS: Moved to GLH/ Genomic centre -<br>NTRKfus | Overall |           |
|------------------------------------------------|---------|-----------|
|                                                | n       | % (N = 5) |
| No                                             | 1       | 20%       |
| Yes                                            | 4       | 80%       |
| NA.                                            | 4       | -         |

NGS: Moved to GLH/ Genomic centre -  
BRCA 1/2

| NGS: Moved to GLH/ Genomic centre - BRCA 1/2 | Overall |           |
|----------------------------------------------|---------|-----------|
|                                              | n       | % (N = 4) |
| Yes                                          | 4       | 100%      |
| NA.                                          | 5       | -         |

NGS: Moving to GLH/ Genomic hubs - PIK3CA

| NGS: Moving to GLH/ Genomic hubs - PIK3CA | Overall |           |
|-------------------------------------------|---------|-----------|
|                                           | n       | % (N = 2) |
| No                                        | 2       | 100%      |
| NA.                                       | 7       | -         |

NGS: Moving to GLH/ Genomic hubs - HER2

| NGS: Moving to GLH/ Genomic hubs - HER2 | Overall |           |
|-----------------------------------------|---------|-----------|
|                                         | n       | % (N = 1) |
| No                                      | 1       | 100%      |
| NA.                                     | 8       | -         |

NGS: Moving to GLH/ Genomic hubs - NTRKfus

| NGS: Moving to GLH/ Genomic hubs - NTRKfus | Overall |           |
|--------------------------------------------|---------|-----------|
|                                            | n       | % (N = 5) |
| No                                         | 5       | 100%      |
| NA.                                        | 4       | -         |

NGS: Moving to GLH/ Genomic hubs - BRCA 1/2

| NGS: Moving to GLH/ Genomic hubs - BRCA 1/2 | Overall |           |
|---------------------------------------------|---------|-----------|
|                                             | n       | % (N = 4) |
| No                                          | 4       | 100%      |
| NA                                          | 5       |           |
|                                             |         |           |
|                                             |         |           |
|                                             |         |           |

NGS: Current Average Turnaround  
time - PIK3CA

| NGS: Current Average Turnaround<br>time - PIK3CA | Overall  |
|--------------------------------------------------|----------|
|                                                  | N = 9    |
| Mean                                             | 40       |
| SD                                               |          |
| Median                                           | 40       |
| IQR                                              | 40 to 40 |
| Range                                            | 40 to 40 |
| NA.                                              | 8        |

NGS: Current Average Turnaround  
time - NTRKfus

| NGS: Current Average Turnaround<br>time - NTRKfus | Overall      |
|---------------------------------------------------|--------------|
|                                                   | N = 9        |
| Mean                                              | 26.1         |
| SD                                                | 10.2         |
| Median                                            | 24.5         |
| IQR                                               | 22.2 to 28.4 |
| Range                                             | 15.5 to 40   |
| NA.                                               | 5            |

NGS: Current Average Turnaround  
time - BRCA 1/2

| NGS: Current Average Turnaround<br>time - BRCA 1/2 | Overall      |      |      |    |
|----------------------------------------------------|--------------|------|------|----|
|                                                    | N = 9        |      |      |    |
| Mean                                               | 29.6666667   | 24.5 | 24.5 | 40 |
| SD                                                 | 8.9          |      |      |    |
| Median                                             | 24.5         |      |      |    |
| IQR                                                | 24.5 to 32.2 |      |      |    |
| Range                                              | 24.5 to 40   |      |      |    |
| NA.                                                | 6            |      |      |    |

Others

| Others      | Overall |           |
|-------------|---------|-----------|
|             | n       | % (N = 9) |
| ki67 (IHC)  | 1       | 11%       |
| N/A         | 5       | 56%       |
| ONCOTYPE DX | 3       | 33%       |
| NA.         | 0       | -         |

Reflex at diagnosis - ONCOTYPE DX

| Reflex at diagnosis - ONCOTYPE DX | Overall |           |
|-----------------------------------|---------|-----------|
|                                   | n       | % (N = 9) |
| N/A                               | 6       | 67%       |
| Not specified                     | 2       | 22%       |
| On request                        | 1       | 11%       |
| NA.                               | 0       | -         |

Testing at progression/ relapse/ other  
post Dx timepoints - ONCOTYPE DX

| Testing at progression/ relapse/ other<br>post Dx timepoints - ONCOTYPE DX | Overall |           |
|----------------------------------------------------------------------------|---------|-----------|
|                                                                            | n       | % (N = 9) |
| N/A                                                                        | 6       | 67%       |
| Not specified                                                              | 2       | 22%       |
| On request                                                                 | 1       | 11%       |
| NA.                                                                        | 0       | -         |

Performed by pathology lab -  
ONCOTYPE DX

| Performed by pathology lab -<br>ONCOTYPE DX | Overall |           |
|---------------------------------------------|---------|-----------|
|                                             | n       | % (N = 9) |
| N/A                                         | 6       | 67%       |
| Other external lab                          | 3       | 33%       |
| NA.                                         | 0       | -         |

Moved to GLH/ Genomic centre -  
ONCOTYPE DX

| Moved to GLH/ Genomic centre -<br>ONCOTYPE DX | Overall |           |
|-----------------------------------------------|---------|-----------|
|                                               | n       | % (N = 9) |
| N/A                                           | 6       | 67%       |
| No                                            | 3       | 33%       |
| NA.                                           | 0       | -         |

Moving to GLH/ Genomic hubs -  
ONCOTYPE DX

| Moving to GLH/ Genomic hubs -<br>ONCOTYPE DX | Overall |           |
|----------------------------------------------|---------|-----------|
|                                              | n       | % (N = 9) |



|     |   |     |
|-----|---|-----|
| N/A | 6 | 67% |
| No  | 3 | 33% |
| NA. | 0 | -   |

Current Average Turnaround time  
(calendar days) - ONCOTYPE DX

| Current Average Turnaround time<br>(calendar days) - ONCOTYPE DX | Overall |           |
|------------------------------------------------------------------|---------|-----------|
|                                                                  | n       | % (N = 9) |
| 24.5                                                             | 1       | 11%       |
| N/A                                                              | 6       | 67%       |
| Not specified                                                    | 2       | 22%       |
| NA.                                                              | 0       | -         |

Reflex at diagnosis - ki67 (IHC)

| Reflex at diagnosis - ki67 (IHC) | Overall |           |
|----------------------------------|---------|-----------|
|                                  | n       | % (N = 9) |
| N/A                              | 8       | 89%       |
| Yes                              | 1       | 11%       |
| NA.                              | 0       | -         |

Testing at progression/ relapse/ other  
post Dx timepoints - ki67 (IHC)

| Testing at progression/ relapse/ other<br>post Dx timepoints - ki67 (IHC) | Overall |           |
|---------------------------------------------------------------------------|---------|-----------|
|                                                                           | n       | % (N = 9) |
| N/A                                                                       | 8       | 89%       |
| No                                                                        | 1       | 11%       |
| NA.                                                                       | 0       | -         |

Performed by pathology lab - ki67  
(IHC)

| Performed by pathology lab - ki67<br>(IHC) | Overall |           |
|--------------------------------------------|---------|-----------|
|                                            | n       | % (N = 9) |
| N/A                                        | 8       | 89%       |
| Yes                                        | 1       | 11%       |
| NA.                                        | 0       | -         |

Moved to GLH/ Genomic centre - ki67  
(IHC)

| Moved to GLH/ Genomic centre - ki67<br>(IHC) | Overall |           |
|----------------------------------------------|---------|-----------|
|                                              | n       | % (N = 9) |
| N/A                                          | 8       | 89%       |
| No                                           | 1       | 11%       |
| NA.                                          | 0       | -         |

Moving to GLH/ Genomic hubs - ki67  
(IHC)

| Moving to GLH/ Genomic hubs - ki67<br>(IHC) | Overall |           |
|---------------------------------------------|---------|-----------|
|                                             | n       | % (N = 9) |
| N/A                                         | 8       | 89%       |
| No                                          | 1       | 11%       |
| NA.                                         | 0       | -         |

Current Average Turnaround time  
(calendar days) - ki67 (IHC)

| Current Average Turnaround time<br>(calendar days) - ki67 (IHC) | Overall |           |
|-----------------------------------------------------------------|---------|-----------|
|                                                                 | n       | % (N = 9) |
| N/A                                                             | 8       | 89%       |
| Not known                                                       | 1       | 11%       |
| NA.                                                             | 0       | -         |

## IHC: Reflex at diagnosis - PD-L1

| IHC: Reflex at diagnosis - PD-L1 | Overall |            |
|----------------------------------|---------|------------|
|                                  | n       | % (N = 15) |
| Yes                              | 15      | 100%       |
| NA.                              | 0       | -          |

## IHC: Reflex at diagnosis - ROS1fus

| IHC: Reflex at diagnosis - ROS1fus | Overall |            |
|------------------------------------|---------|------------|
|                                    | n       | % (N = 15) |
| No                                 | 2       | 13%        |
| Yes                                | 13      | 87%        |
| NA.                                | 0       | -          |

## IHC: Reflex at diagnosis - ALKfus

| IHC: Reflex at diagnosis - ALKfus | Overall |            |
|-----------------------------------|---------|------------|
|                                   | n       | % (N = 15) |
| On request                        | 1       | 7%         |
| Yes                               | 14      | 93%        |
| NA.                               | 0       | -          |

## IHC: Reflex at diagnosis - BRAF

| IHC: Reflex at diagnosis - BRAF | Overall |            |
|---------------------------------|---------|------------|
|                                 | n       | % (N = 15) |
| No                              | 14      | 93%        |
| Yes                             | 1       | 7%         |
| NA.                             | 0       | -          |

## IHC: Reflex at diagnosis - NTRKfus

| IHC: Reflex at diagnosis - NTRKfus | Overall |            |
|------------------------------------|---------|------------|
|                                    | n       | % (N = 15) |
| No                                 | 12      | 80%        |
| Yes                                | 3       | 20%        |
| NA.                                | 0       | -          |

IHC: Testing at progression / relapse / other post Dx timepoints - PD-L1

| IHC: Testing at progression / relapse / other post Dx timepoints - PD-L1 | Overall |            |
|--------------------------------------------------------------------------|---------|------------|
|                                                                          | n       | % (N = 15) |
| No                                                                       | 4       | 27%        |
| On request                                                               | 7       | 47%        |
| Yes                                                                      | 4       | 27%        |
| NA.                                                                      | 0       | -          |

IHC: Testing at progression / relapse / other post Dx timepoints ROS1fus

| IHC: Testing at progression / relapse / other post Dx timepoints ROS1fus | Overall |            |
|--------------------------------------------------------------------------|---------|------------|
|                                                                          | n       | % (N = 15) |
| No                                                                       | 8       | 53%        |
| On request                                                               | 5       | 33%        |
| Yes                                                                      | 2       | 13%        |
| NA.                                                                      | 0       | -          |

IHC: Testing at progression / relapse / other post Dx timepoints - ALKfus

| IHC: Testing at progression / relapse / other post Dx timepoints - ALKfus | Overall |            |
|---------------------------------------------------------------------------|---------|------------|
|                                                                           | n       | % (N = 15) |
| No                                                                        | 7       | 47%        |
| On request                                                                | 6       | 40%        |
| Yes                                                                       | 2       | 13%        |
| NA.                                                                       | 0       | -          |

IHC: Testing at progression / relapse / other post Dx timepoints - BRAF

| IHC: Testing at progression / relapse / other post Dx timepoints - BRAF | Overall |            |
|-------------------------------------------------------------------------|---------|------------|
|                                                                         | n       | % (N = 15) |
| No                                                                      | 14      | 93%        |
| On request                                                              | 1       | 7%         |
| NA.                                                                     | 0       | -          |

IHC: Testing at progression / relapse / other post Dx timepoints - NTRKfus

| IHC: Testing at progression / relapse / other post Dx timepoints - NTRKfus | Overall |            |
|----------------------------------------------------------------------------|---------|------------|
|                                                                            | n       | % (N = 15) |
| No                                                                         | 14      | 93%        |
| On request                                                                 | 1       | 7%         |
| NA.                                                                        | 0       | -          |

IHC: Performed by pathology lab - PD-L1

| IHC: Performed by pathology lab - PD-L1 | Overall |            |
|-----------------------------------------|---------|------------|
|                                         | n       | % (N = 15) |
| Other external lab                      | 1       | 7%         |
| Yes                                     | 14      | 93%        |
| NA.                                     | 0       | -          |

IHC: Performed by pathology lab - ROS1fus

| IHC: Performed by pathology lab - ROS1fus | Overall |            |
|-------------------------------------------|---------|------------|
|                                           | n       | % (N = 13) |
| Other external lab                        | 2       | 15%        |
| Yes                                       | 11      | 85%        |
| NA.                                       | 2       | -          |

IHC: Performed by pathology lab - ALKfus

| IHC: Performed by pathology lab - ALKfus | Overall |            |
|------------------------------------------|---------|------------|
|                                          | n       | % (N = 15) |
| Other external lab                       | 1       | 7%         |
| Yes                                      | 14      | 93%        |
| NA.                                      | 0       | -          |

IHC: Performed by pathology lab - BRAF

| IHC: Performed by pathology lab - BRAF | Overall |           |
|----------------------------------------|---------|-----------|
|                                        | n       | % (N = 1) |
| Yes                                    | 1       | 100%      |
| NA.                                    | 14      | -         |

## IHC: Performed by pathology lab - NTRKfus

| IHC: Performed by pathology lab - NTRKfus | Overall |           |
|-------------------------------------------|---------|-----------|
|                                           | n       | % (N = 3) |
| Other external lab                        | 1       | 33%       |
| Yes                                       | 2       | 67%       |
| NA.                                       | 12      | -         |

## IHC: Moved to GLH / Genomic Centre - PD-L1

| IHC: Moved to GLH / Genomic Centre - PD-L1 | Overall |            |
|--------------------------------------------|---------|------------|
|                                            | n       | % (N = 15) |
| No                                         | 15      | 100%       |
| NA.                                        | 0       | -          |

## IHC: Moved to GLH / Genomic Centre - ROS1fus

| IHC: Moved to GLH / Genomic Centre - ROS1fus | Overall |            |
|----------------------------------------------|---------|------------|
|                                              | n       | % (N = 13) |
| No                                           | 13      | 100%       |
| NA.                                          | 2       | -          |

## IHC: Moved to GLH / Genomic Centre - ALKfus

| IHC: Moved to GLH / Genomic Centre - ALKfus | Overall |            |
|---------------------------------------------|---------|------------|
|                                             | n       | % (N = 15) |
| No                                          | 15      | 100%       |
| NA.                                         | 0       | -          |

## IHC: Moved to GLH / Genomic Centre - BRAF

| IHC: Moved to GLH / Genomic Centre - BRAF | Overall |           |
|-------------------------------------------|---------|-----------|
|                                           | n       | % (N = 1) |
| No                                        | 1       | 100%      |
| NA.                                       | 14      | -         |

## IHC: Moved to GLH / Genomic Centre - NTRKfus

| IHC: Moved to GLH / Genomic Centre - NTRKfus | Overall |           |
|----------------------------------------------|---------|-----------|
|                                              | n       | % (N = 3) |
| No                                           | 3       | 100%      |
| NA.                                          | 12      | -         |

## IHC: Moving to GLH / Genomic hubs - PL-D1

| IHC: Moving to GLH / Genomic hubs - PL-D1 | Overall |            |
|-------------------------------------------|---------|------------|
|                                           | n       | % (N = 15) |
| No                                        | 15      | 100%       |
| NA.                                       | 0       | -          |

## IHC: Moving to GLH / Genomic hubs - ROS1fus

| IHC: Moving to GLH / Genomic hubs - ROS1fus | Overall |            |
|---------------------------------------------|---------|------------|
|                                             | n       | % (N = 13) |
| No                                          | 13      | 100%       |
| NA.                                         | 2       | -          |

## IHC: Moving to GLH / Genomic hubs - ALKfus

| IHC: Moving to GLH / Genomic hubs - ALKfus | Overall |            |
|--------------------------------------------|---------|------------|
|                                            | n       | % (N = 15) |
| No                                         | 15      | 100%       |
| NA.                                        | 0       | -          |

## IHC: Moving to GLH / Genomic hubs - BRAF

| IHC: Moving to GLH / Genomic hubs - BRAF | Overall |           |
|------------------------------------------|---------|-----------|
|                                          | n       | % (N = 1) |
| No                                       | 1       | 100%      |
| NA.                                      | 14      | -         |

## IHC: Moving to GLH / Genomic hubs - NTRKfus

| IHC: Moving to GLH / Genomic hubs - NTRKfus | Overall |  |
|---------------------------------------------|---------|--|
|---------------------------------------------|---------|--|

|     | n  | % (N = 3) |
|-----|----|-----------|
| No  | 3  | 100%      |
| NA. | 12 | -         |

## IHC: Current average turnaround time - PD-L1

| IHC: Current average turnaround time - PD-L1 | Overall |
|----------------------------------------------|---------|
|                                              | N = 15  |
| Mean                                         | 4.9     |
| SD                                           | 7.5     |
| Median                                       | 2.5     |
| IQR                                          | 2 to 3  |
| Range                                        | 1 to 30 |
| NA.                                          | 1       |

## IHC: Current average turnaround time - ROS1fus

| IHC: Current average turnaround time - ROS1fus | Overall |
|------------------------------------------------|---------|
|                                                | N = 15  |
| Mean                                           | 5.8     |
| SD                                             | 8       |
| Median                                         | 2.8     |
| IQR                                            | 2 to 7  |
| Range                                          | 1 to 30 |
| NA.                                            | 3       |

## IHC: Current average turnaround time - ALKfus

| IHC: Current average turnaround time - ALKfus | Overall |
|-----------------------------------------------|---------|
|                                               | N = 15  |
| Mean                                          | 5.1     |
| SD                                            | 7.7     |
| Median                                        | 2.5     |
| IQR                                           | 2 to 3  |
| Range                                         | 1 to 30 |
| NA.                                           | 2       |

## IHC: Current average turnaround time - BRAF

| IHC: Current average turnaround time - BRAF | Overall |
|---------------------------------------------|---------|
|                                             | N = 15  |



|        |        |
|--------|--------|
| Mean   | 3      |
| SD     |        |
| Median | 3      |
| IQR    | 3 to 3 |
| Range  | 3 to 3 |
| NA.    | 14     |

## IHC: Current average turnaround time - NTRKfus

| IHC: Current average turnaround time - NTRKfus | Overall     |
|------------------------------------------------|-------------|
|                                                | N = 15      |
| Mean                                           | 13.5        |
| SD                                             | 14.5        |
| Median                                         | 7.5         |
| IQR                                            | 5.2 to 18.8 |
| Range                                          | 3 to 30     |
| NA.                                            | 12          |

## FISH: Reflex at diagnosis - ALKfus

| FISH: Reflex at diagnosis - ALKfus | Overall |            |
|------------------------------------|---------|------------|
|                                    | n       | % (N = 15) |
| No                                 | 8       | 53%        |
| On request                         | 2       | 13%        |
| Yes                                | 5       | 33%        |
| NA.                                | 0       | -          |

## FISH: Reflex at diagnosis - ROS1fus

| FISH: Reflex at diagnosis - ROS1fus | Overall |            |
|-------------------------------------|---------|------------|
|                                     | n       | % (N = 15) |
| No                                  | 8       | 53%        |
| On request                          | 2       | 13%        |
| Yes                                 | 5       | 33%        |
| NA.                                 | 0       | -          |

## FISH: Reflex at diagnosis - METamp

| FISH: Reflex at diagnosis - METamp | Overall |            |
|------------------------------------|---------|------------|
|                                    | n       | % (N = 15) |
| No                                 | 11      | 73%        |
| On request                         | 3       | 20%        |

|     |   |    |
|-----|---|----|
| Yes | 1 | 7% |
| NA. | 0 | -  |

## FISH: Reflex at diagnosis - HER2amp

| FISH: Reflex at diagnosis - HER2amp | Overall |            |
|-------------------------------------|---------|------------|
|                                     | n       | % (N = 15) |
| No                                  | 12      | 80%        |
| On request                          | 2       | 13%        |
| Yes                                 | 1       | 7%         |
| NA.                                 | 0       | -          |

## FISH: Reflex at diagnosis - RETfus

| FISH: Reflex at diagnosis - RETfus | Overall |            |
|------------------------------------|---------|------------|
|                                    | n       | % (N = 15) |
| No                                 | 10      | 67%        |
| On request                         | 3       | 20%        |
| Yes                                | 2       | 13%        |
| NA.                                | 0       | -          |

## FISH: Reflex at diagnosis - NTRKfus

| FISH: Reflex at diagnosis - NTRKfus | Overall |            |
|-------------------------------------|---------|------------|
|                                     | n       | % (N = 15) |
| No                                  | 12      | 80%        |
| On request                          | 3       | 20%        |
| NA.                                 | 0       | -          |

FISH: Testing at progression / relapse / other post  
Dx timepoints - ALKfus

| FISH: Testing at progression / relapse / other post<br>Dx timepoints - ALKfus | Overall |            |
|-------------------------------------------------------------------------------|---------|------------|
|                                                                               | n       | % (N = 15) |
| No                                                                            | 10      | 67%        |
| On request                                                                    | 3       | 20%        |
| Yes                                                                           | 2       | 13%        |
| NA.                                                                           | 0       | -          |

FISH: Testing at progression / relapse / other post  
Dx timepoints ROS1fus

| FISH: Testing at progression / relapse / other post<br>Dx timepoints ROS1fus | Overall |            |
|------------------------------------------------------------------------------|---------|------------|
|                                                                              | n       | % (N = 15) |
| No                                                                           | 10      | 67%        |
| On request                                                                   | 3       | 20%        |
| Yes                                                                          | 2       | 13%        |
| NA.                                                                          | 0       | -          |

FISH: Testing at progression / relapse / other post  
Dx timepoints - METamp

| FISH: Testing at progression / relapse / other post<br>Dx timepoints - METamp | Overall |            |
|-------------------------------------------------------------------------------|---------|------------|
|                                                                               | n       | % (N = 15) |
| No                                                                            | 12      | 80%        |
| On request                                                                    | 3       | 20%        |
| NA.                                                                           | 0       | -          |

FISH: Testing at progression / relapse / other post  
Dx timepoints - HER2amp

| FISH: Testing at progression / relapse / other post<br>Dx timepoints - HER2amp | Overall |            |
|--------------------------------------------------------------------------------|---------|------------|
|                                                                                | n       | % (N = 15) |
| No                                                                             | 14      | 93%        |
| On request                                                                     | 1       | 7%         |
| NA.                                                                            | 0       | -          |

FISH: Testing at progression / relapse / other post  
Dx timepoints - RETfus

| FISH: Testing at progression / relapse / other post<br>Dx timepoints - RETfus | Overall |            |
|-------------------------------------------------------------------------------|---------|------------|
|                                                                               | n       | % (N = 15) |
| No                                                                            | 14      | 93%        |
| On request                                                                    | 1       | 7%         |
| NA.                                                                           | 0       | -          |

FISH: Testing at progression / relapse / other post  
Dx timepoints - NTRKfus

| FISH: Testing at progression / relapse / other post<br>Dx timepoints - NTRKfus | Overall |            |
|--------------------------------------------------------------------------------|---------|------------|
|                                                                                | n       | % (N = 15) |
| No                                                                             | 14      | 93%        |
| On request                                                                     | 1       | 7%         |
| NA.                                                                            | 0       | -          |

FISH: Performed by pathology lab - ALKfus

| FISH: Performed by pathology lab - ALKfus | Overall |           |
|-------------------------------------------|---------|-----------|
|                                           | n       | % (N = 8) |
| No                                        | 3       | 38%       |
| Yes                                       | 5       | 62%       |
| NA.                                       | 7       | -         |

FISH: Performed by pathology lab - ROS1fus

| FISH: Performed by pathology lab - ROS1fus | Overall |           |
|--------------------------------------------|---------|-----------|
|                                            | n       | % (N = 8) |
| No                                         | 3       | 38%       |
| Yes                                        | 5       | 62%       |
| NA.                                        | 7       | -         |

FISH: Performed by pathology lab - METamp

| FISH: Performed by pathology lab - METamp | Overall |           |
|-------------------------------------------|---------|-----------|
|                                           | n       | % (N = 5) |
| No                                        | 2       | 40%       |
| Other external lab                        | 1       | 20%       |
| Yes                                       | 2       | 40%       |
| NA.                                       | 10      | -         |

FISH: Performed by pathology lab - HER2amp

| FISH: Performed by pathology lab - HER2amp | Overall |           |
|--------------------------------------------|---------|-----------|
|                                            | n       | % (N = 4) |
| No                                         | 2       | 50%       |
| Yes                                        | 2       | 50%       |
| NA.                                        | 11      | -         |

FISH: Performed by pathology lab - RETfus

| FISH: Performed by pathology lab - RETfus | Overall |           |
|-------------------------------------------|---------|-----------|
|                                           | n       | % (N = 6) |
| No                                        | 2       | 33%       |
| Other external lab                        | 1       | 17%       |
| Yes                                       | 3       | 50%       |
| NA.                                       | 9       | -         |

FISH: Performed by pathology lab - NTRKfus

| FISH: Performed by pathology lab - NTRKfus | Overall |           |
|--------------------------------------------|---------|-----------|
|                                            | n       | % (N = 4) |
| No                                         | 2       | 50%       |
| Yes                                        | 2       | 50%       |
| NA.                                        | 11      | -         |

FISH: Moved to GLH / Genomic Centre - ALKfus

| FISH: Moved to GLH / Genomic Centre - ALKfus | Overall |           |
|----------------------------------------------|---------|-----------|
|                                              | n       | % (N = 8) |
| No                                           | 5       | 62%       |
| Yes                                          | 3       | 38%       |
| NA.                                          | 7       | -         |

FISH: Moved to GLH / Genomic Centre - ROS1fus

| FISH: Moved to GLH / Genomic Centre - ROS1fus | Overall |           |
|-----------------------------------------------|---------|-----------|
|                                               | n       | % (N = 8) |
| No                                            | 5       | 62%       |
| Yes                                           | 3       | 38%       |
| NA.                                           | 7       | -         |

FISH: Moved to GLH / Genomic Centre - METamp

| FISH: Moved to GLH / Genomic Centre - METamp | Overall |           |
|----------------------------------------------|---------|-----------|
|                                              | n       | % (N = 5) |
| No                                           | 3       | 60%       |
| Yes                                          | 2       | 40%       |
| NA.                                          | 10      | -         |

## FISH: Moved to GLH / Genomic Centre - HER2amp

| FISH: Moved to GLH / Genomic Centre - HER2amp | Overall |           |
|-----------------------------------------------|---------|-----------|
|                                               | n       | % (N = 4) |
| No                                            | 2       | 50%       |
| Yes                                           | 2       | 50%       |
| NA.                                           | 11      | -         |

## FISH: Moved to GLH / Genomic Centre - RETfus

| FISH: Moved to GLH / Genomic Centre - RETfus | Overall |           |
|----------------------------------------------|---------|-----------|
|                                              | n       | % (N = 6) |
| No                                           | 4       | 67%       |
| Yes                                          | 2       | 33%       |
| NA.                                          | 9       | -         |

## FISH: Moved to GLH / Genomic Centre - NTRKfus

| FISH: Moved to GLH / Genomic Centre - NTRKfus | Overall |           |
|-----------------------------------------------|---------|-----------|
|                                               | n       | % (N = 4) |
| No                                            | 2       | 50%       |
| Yes                                           | 2       | 50%       |
| NA.                                           | 11      | -         |

## FISH: Moving to GLH / Genomic hubs - ALKfus

| FISH: Moving to GLH / Genomic hubs - ALKfus | Overall |           |
|---------------------------------------------|---------|-----------|
|                                             | n       | % (N = 8) |

|     |   |      |
|-----|---|------|
| No  | 8 | 100% |
| NA. | 7 | -    |

## FISH: Moving to GLH / Genomic hubs - ROS1fus

| FISH: Moving to GLH / Genomic hubs - ROS1fus | Overall |           |
|----------------------------------------------|---------|-----------|
|                                              | n       | % (N = 8) |
| No                                           | 8       | 100%      |
| NA.                                          | 7       | -         |

## FISH: Moving to GLH / Genomic hubs - METamp

| FISH: Moving to GLH / Genomic hubs - METamp | Overall |           |
|---------------------------------------------|---------|-----------|
|                                             | n       | % (N = 5) |
| No                                          | 5       | 100%      |
| NA.                                         | 10      | -         |

## FISH: Moving to GLH / Genomic hubs - HER2amp

| FISH: Moving to GLH / Genomic hubs - HER2amp | Overall |           |
|----------------------------------------------|---------|-----------|
|                                              | n       | % (N = 4) |
| No                                           | 4       | 100%      |
| NA.                                          | 11      | -         |

## FISH: Moving to GLH / Genomic hubs - RETfus

| FISH: Moving to GLH / Genomic hubs - RETfus | Overall |           |
|---------------------------------------------|---------|-----------|
|                                             | n       | % (N = 6) |
| No                                          | 6       | 100%      |
| NA.                                         | 9       | -         |

## FISH: Moving to GLH / Genomic hubs - NTRKfus

| FISH: Moving to GLH / Genomic hubs - NTRKfus | Overall |           |
|----------------------------------------------|---------|-----------|
|                                              | n       | % (N = 4) |
| No                                           | 4       | 100%      |
| NA.                                          | 11      | -         |

## FISH: Current average turnaround time - ALKfus

| FISH: Current average turnaround time - ALKfus | Overall   |
|------------------------------------------------|-----------|
|                                                | N = 15    |
| Mean                                           | 8.4       |
| SD                                             | 5.8       |
| Median                                         | 7.2       |
| IQR                                            | 5.5 to 10 |
| Range                                          | 2 to 21   |
| NA.                                            | 7         |

## FISH: Current average turnaround time - ROS1fus

| FISH: Current average turnaround time - ROS1fus | Overall   |
|-------------------------------------------------|-----------|
|                                                 | N = 15    |
| Mean                                            | 8.4       |
| SD                                              | 5.8       |
| Median                                          | 7.2       |
| IQR                                             | 5.5 to 10 |
| Range                                           | 2 to 21   |
| NA.                                             | 7         |

## FISH: Current average turnaround time - METamp

| FISH: Current average turnaround time - METamp | Overall   |
|------------------------------------------------|-----------|
|                                                | N = 15    |
| Mean                                           | 14.1      |
| SD                                             | 11.3      |
| Median                                         | 10        |
| IQR                                            | 7.5 to 21 |
| Range                                          | 2 to 30   |
| NA.                                            | 10        |



## FISH: Current average turnaround time - HER2amp

| FISH: Current average turnaround time - HER2amp | Overall     |
|-------------------------------------------------|-------------|
|                                                 | N = 15      |
| Mean                                            | 10.1        |
| SD                                              | 8           |
| Median                                          | 8.8         |
| IQR                                             | 6.1 to 12.8 |
| Range                                           | 2 to 21     |
| NA.                                             | 11          |

## FISH: Current average turnaround time - RETfus

| FISH: Current average turnaround time - RETfus | Overall     |
|------------------------------------------------|-------------|
|                                                | N = 15      |
| Mean                                           | 12.4        |
| SD                                             | 10.9        |
| Median                                         | 8.8         |
| IQR                                            | 4.9 to 18.2 |
| Range                                          | 2 to 30     |
| NA.                                            | 9           |

## FISH: Current average turnaround time - NTRKfus

| FISH: Current average turnaround time - NTRKfus | Overall     |
|-------------------------------------------------|-------------|
|                                                 | N = 15      |
| Mean                                            | 9.2         |
| SD                                              | 8.5         |
| Median                                          | 7           |
| IQR                                             | 3.5 to 12.8 |
| Range                                           | 2 to 21     |
| NA.                                             | 11          |

## RT-PCR: Reflex at diagnosis - EGFR

| RT-PCR: Reflex at diagnosis - EGFR | Overall |            |
|------------------------------------|---------|------------|
|                                    | n       | % (N = 15) |
| No                                 | 4       | 27%        |
| Yes                                | 11      | 73%        |
| NA.                                | 0       | -          |

## RT-PCR: Reflex at diagnosis - ROS1fus

| RT-PCR: Reflex at diagnosis - ROS1fus | Overall |            |
|---------------------------------------|---------|------------|
|                                       | n       | % (N = 15) |
| No                                    | 13      | 87%        |
| Yes                                   | 2       | 13%        |
| NA.                                   | 0       | -          |

## RT-PCR: Reflex at diagnosis - ALKfus

| RT-PCR: Reflex at diagnosis - ALKfus | Overall |            |
|--------------------------------------|---------|------------|
|                                      | n       | % (N = 15) |
| No                                   | 13      | 87%        |
| Yes                                  | 2       | 13%        |
| NA.                                  | 0       | -          |

## RT-PCR: Reflex at diagnosis - ALK

| RT-PCR: Reflex at diagnosis - ALK | Overall |            |
|-----------------------------------|---------|------------|
|                                   | n       | % (N = 15) |
| No                                | 13      | 87%        |
| Yes                               | 2       | 13%        |
| NA.                               | 0       | -          |

## RT-PCR: Reflex at diagnosis - BRAF

| RT-PCR: Reflex at diagnosis - BRAF | Overall |            |
|------------------------------------|---------|------------|
|                                    | n       | % (N = 15) |
| No                                 | 6       | 40%        |
| On request                         | 3       | 20%        |
| Yes                                | 6       | 40%        |
| NA.                                | 0       | -          |

## RT-PCR: Reflex at diagnosis - KRAS

| RT-PCR: Reflex at diagnosis - KRAS | Overall |            |
|------------------------------------|---------|------------|
|                                    | n       | % (N = 15) |
| No                                 | 8       | 53%        |
| On request                         | 3       | 20%        |
| Yes                                | 4       | 27%        |

|     |   |   |
|-----|---|---|
| NA. | 0 | - |
|-----|---|---|

## RT-PCR: Reflex at diagnosis - METex14

| RT-PCR: Reflex at diagnosis - METex14 | Overall |            |
|---------------------------------------|---------|------------|
|                                       | n       | % (N = 15) |
| No                                    | 9       | 60%        |
| On request                            | 3       | 20%        |
| Yes                                   | 3       | 20%        |
| NA.                                   | 0       | -          |

## RT-PCR: Reflex at diagnosis - HER2

| RT-PCR: Reflex at diagnosis - HER2 | Overall |            |
|------------------------------------|---------|------------|
|                                    | n       | % (N = 15) |
| No                                 | 12      | 80%        |
| On request                         | 2       | 13%        |
| Yes                                | 1       | 7%         |
| NA.                                | 0       | -          |

## RT-PCR: Reflex at diagnosis - RETfus

| RT-PCR: Reflex at diagnosis - RETfus | Overall |            |
|--------------------------------------|---------|------------|
|                                      | n       | % (N = 15) |
| No                                   | 10      | 67%        |
| On request                           | 2       | 13%        |
| Yes                                  | 3       | 20%        |
| NA.                                  | 0       | -          |

## RT-PCR: Reflex at diagnosis - NTRKfus

| RT-PCR: Reflex at diagnosis - NTRKfus | Overall |            |
|---------------------------------------|---------|------------|
|                                       | n       | % (N = 15) |
| No                                    | 9       | 60%        |
| On request                            | 4       | 27%        |
| Yes                                   | 2       | 13%        |
| NA.                                   | 0       | -          |

## RT-PCR: Testing at progression / relapse / other post Dx timepoints - EGFR

| RT-PCR: Testing at progression / relapse / other post Dx timepoints - EGFR | Overall |            |
|----------------------------------------------------------------------------|---------|------------|
|                                                                            | n       | % (N = 15) |
| No                                                                         | 7       | 47%        |
| On request                                                                 | 5       | 33%        |
| Yes                                                                        | 3       | 20%        |
| NA.                                                                        | 0       | -          |

RT-PCR: Testing at progression / relapse / other post Dx timepoints - ROS1fus

| RT-PCR: Testing at progression / relapse / other post Dx timepoints - ROS1fus | Overall |            |
|-------------------------------------------------------------------------------|---------|------------|
|                                                                               | n       | % (N = 15) |
| No                                                                            | 14      | 93%        |
| On request                                                                    | 1       | 7%         |
| NA.                                                                           | 0       | -          |

RT-PCR: Testing at progression / relapse / other post Dx timepointss - ALKfus

| RT-PCR: Testing at progression / relapse / other post Dx timepointss - ALKfus | Overall |            |
|-------------------------------------------------------------------------------|---------|------------|
|                                                                               | n       | % (N = 15) |
| No                                                                            | 14      | 93%        |
| On request                                                                    | 1       | 7%         |
| NA.                                                                           | 0       | -          |

RT-PCR: Testing at progression / relapse / other post Dx timepoints - ALK

| RT-PCR: Testing at progression / relapse / other post Dx timepoints - ALK | Overall |            |
|---------------------------------------------------------------------------|---------|------------|
|                                                                           | n       | % (N = 15) |
| No                                                                        | 14      | 93%        |
| On request                                                                | 1       | 7%         |
| NA.                                                                       | 0       | -          |

RT-PCR: Testing at progression / relapse / other post Dx timepointss - BRAF

| RT-PCR: Testing at progression / relapse / other post Dx timepointss - BRAF | Overall |            |
|-----------------------------------------------------------------------------|---------|------------|
|                                                                             | n       | % (N = 15) |
| No                                                                          | 9       | 60%        |
| On request                                                                  | 5       | 33%        |
| Yes                                                                         | 1       | 7%         |
| NA.                                                                         | 0       | -          |

RT-PCR: Testing at progression / relapse / other post Dx timepoints - KRAS

| RT-PCR: Testing at progression / relapse / other post Dx timepoints - KRAS | Overall |            |
|----------------------------------------------------------------------------|---------|------------|
|                                                                            | n       | % (N = 15) |
| No                                                                         | 11      | 73%        |
| On request                                                                 | 4       | 27%        |
| NA.                                                                        | 0       | -          |

RT-PCR: Testing at progression / relapse / other post Dx timepoints - METex14

| RT-PCR: Testing at progression / relapse / other post Dx timepoints - METex14 | Overall |            |
|-------------------------------------------------------------------------------|---------|------------|
|                                                                               | n       | % (N = 15) |
| No                                                                            | 12      | 80%        |
| On request                                                                    | 3       | 20%        |
| NA.                                                                           | 0       | -          |

RT-PCR: Testing at progression / relapse / other post Dx timepoints - HER2

| RT-PCR: Testing at progression / relapse / other post Dx timepoints - HER2 | Overall |            |
|----------------------------------------------------------------------------|---------|------------|
|                                                                            | n       | % (N = 15) |
| No                                                                         | 14      | 93%        |
| On request                                                                 | 1       | 7%         |
| NA.                                                                        | 0       | -          |

RT-PCR: Testing at progression / relapse / other post Dx timepointss - RETfus

| RT-PCR: Testing at progression / relapse / other post Dx timepoints - RETfus | Overall |            |
|------------------------------------------------------------------------------|---------|------------|
|                                                                              | n       | % (N = 15) |
| No                                                                           | 14      | 93%        |
| On request                                                                   | 1       | 7%         |
| NA.                                                                          | 0       | -          |

RT-PCR: Testing at progression / relapse / other post Dx timepoints - NTRKfus

| RT-PCR: Testing at progression / relapse / other post Dx timepoints - NTRKfus | Overall |            |
|-------------------------------------------------------------------------------|---------|------------|
|                                                                               | n       | % (N = 15) |
| No                                                                            | 12      | 80%        |
| On request                                                                    | 3       | 20%        |
| NA.                                                                           | 0       | -          |

RT-PCR: Performed by pathology lab - EGFR

| RT-PCR: Performed by pathology lab - EGFR | Overall |            |
|-------------------------------------------|---------|------------|
|                                           | n       | % (N = 11) |
| No                                        | 1       | 9%         |
| Other external lab                        | 1       | 9%         |
| Yes                                       | 9       | 82%        |
| NA.                                       | 4       | -          |

RT-PCR: Performed by pathology lab - ROS1fus

| RT-PCR: Performed by pathology lab - ROS1fus | Overall |           |
|----------------------------------------------|---------|-----------|
|                                              | n       | % (N = 2) |
| Yes                                          | 2       | 100%      |
| NA.                                          | 13      | -         |

RT-PCR: Performed by pathology lab - ALKfus

| RT-PCR: Performed by pathology lab - ALKfus | Overall |           |
|---------------------------------------------|---------|-----------|
|                                             | n       | % (N = 2) |
| Yes                                         | 2       | 100%      |
| NA.                                         | 13      | -         |

## RT-PCR: Performed by pathology lab - ALK

| RT-PCR: Performed by pathology lab - ALK | Overall |           |
|------------------------------------------|---------|-----------|
|                                          | n       | % (N = 2) |
| Yes                                      | 2       | 100%      |
| NA.                                      | 13      | -         |

## RT-PCR: Performed by pathology lab - BRAF...94

| RT-PCR: Performed by pathology lab - BRAF...94 | Overall |           |
|------------------------------------------------|---------|-----------|
|                                                | n       | % (N = 9) |
| No                                             | 1       | 11%       |
| Other external lab                             | 2       | 22%       |
| Yes                                            | 6       | 67%       |
| NA.                                            | 6       | -         |

## RT-PCR: Performed by pathology lab - KRAS

| RT-PCR: Performed by pathology lab - KRAS | Overall |           |
|-------------------------------------------|---------|-----------|
|                                           | n       | % (N = 7) |
| No                                        | 1       | 14%       |
| Other external lab                        | 2       | 29%       |
| Yes                                       | 4       | 57%       |
| NA.                                       | 8       | -         |

## RT-PCR: Performed by pathology lab - METex14

| RT-PCR: Performed by pathology lab - METex14 | Overall |           |
|----------------------------------------------|---------|-----------|
|                                              | n       | % (N = 6) |
| No                                           | 1       | 17%       |
| Other external lab                           | 2       | 33%       |
| Yes                                          | 3       | 50%       |
| NA.                                          | 9       | -         |

## RT-PCR: Performed by pathology lab - HER2

| RT-PCR: Performed by pathology lab - HER2 | Overall |           |
|-------------------------------------------|---------|-----------|
|                                           | n       | % (N = 3) |
| Other external lab                        | 1       | 33%       |
| Yes                                       | 2       | 67%       |
| NA.                                       | 12      | -         |

RT-PCR: Performed by pathology lab - RETfus

| RT-PCR: Performed by pathology lab - RETfus | Overall |           |
|---------------------------------------------|---------|-----------|
|                                             | n       | % (N = 5) |
| No                                          | 1       | 20%       |
| Other external lab                          | 1       | 20%       |
| Yes                                         | 3       | 60%       |
| NA.                                         | 10      | -         |

RT-PCR: Performed by pathology lab - NTRKfus

| RT-PCR: Performed by pathology lab - NTRKfus | Overall |           |
|----------------------------------------------|---------|-----------|
|                                              | n       | % (N = 6) |
| No                                           | 1       | 17%       |
| Other external lab                           | 2       | 33%       |
| Yes                                          | 3       | 50%       |
| NA.                                          | 9       | -         |

RT-PCR: Moved to GLH / Genomic Centre - EGFR

| RT-PCR: Moved to GLH / Genomic Centre - EGFR | Overall |            |
|----------------------------------------------|---------|------------|
|                                              | n       | % (N = 11) |
| No                                           | 10      | 91%        |
| Yes                                          | 1       | 9%         |
| NA.                                          | 4       | -          |

RT-PCR: Moved to GLH / Genomic Centre - ROS1fus

| RT-PCR: Moved to GLH / Genomic Centre - ROS1fus | Overall |           |
|-------------------------------------------------|---------|-----------|
|                                                 | n       | % (N = 2) |



|     |    |      |
|-----|----|------|
| No  | 2  | 100% |
| NA. | 13 | -    |

RT-PCR: Moved to GLH / Genomic Centre - ALKfus

| RT-PCR: Moved to GLH / Genomic Centre - ALKfus | Overall |           |
|------------------------------------------------|---------|-----------|
|                                                | n       | % (N = 2) |
| No                                             | 2       | 100%      |
| NA.                                            | 13      | -         |

RT-PCR: Moved to GLH / Genomic Centre - ALK

| RT-PCR: Moved to GLH / Genomic Centre - ALK | Overall |           |
|---------------------------------------------|---------|-----------|
|                                             | n       | % (N = 2) |
| No                                          | 2       | 100%      |
| NA.                                         | 13      | -         |

RT-PCR: Moved to GLH / Genomic Centre - BRAF

| RT-PCR: Moved to GLH / Genomic Centre - BRAF | Overall |           |
|----------------------------------------------|---------|-----------|
|                                              | n       | % (N = 9) |
| No                                           | 8       | 89%       |
| Yes                                          | 1       | 11%       |
| NA.                                          | 6       | -         |

RT-PCR: Moved to GLH / Genomic Centre - KRAS

| RT-PCR: Moved to GLH / Genomic Centre - KRAS | Overall |           |
|----------------------------------------------|---------|-----------|
|                                              | n       | % (N = 7) |
| No                                           | 6       | 86%       |
| Yes                                          | 1       | 14%       |
| NA.                                          | 8       | -         |

RT-PCR: Moved to GLH / Genomic Centre -  
METex14

| RT-PCR: Moved to GLH / Genomic Centre -<br>METex14 | Overall |           |
|----------------------------------------------------|---------|-----------|
|                                                    | n       | % (N = 6) |
| No                                                 | 5       | 83%       |
| Yes                                                | 1       | 17%       |
| NA.                                                | 9       | -         |

RT-PCR: Moved to GLH / Genomic Centre - HER2

| RT-PCR: Moved to GLH / Genomic Centre - HER2 | Overall |           |
|----------------------------------------------|---------|-----------|
|                                              | n       | % (N = 3) |
| No                                           | 3       | 100%      |
| NA.                                          | 12      | -         |

RT-PCR: Moved to GLH / Genomic Centre - RETfus

| RT-PCR: Moved to GLH / Genomic Centre - RETfus | Overall |           |
|------------------------------------------------|---------|-----------|
|                                                | n       | % (N = 5) |
| No                                             | 4       | 80%       |
| Yes                                            | 1       | 20%       |
| NA.                                            | 10      | -         |

RT-PCR: Moved to GLH / Genomic Centre - NTRKfus

| RT-PCR: Moved to GLH / Genomic Centre - NTRKfus | Overall |           |
|-------------------------------------------------|---------|-----------|
|                                                 | n       | % (N = 6) |
| No                                              | 5       | 83%       |
| Yes                                             | 1       | 17%       |
| NA.                                             | 9       | -         |

RT-PCR: Moving to GLH / Genomic hubs - EGFR

| RT-PCR: Moving to GLH / Genomic hubs - EGFR | Overall |            |
|---------------------------------------------|---------|------------|
|                                             | n       | % (N = 11) |
| No                                          | 11      | 100%       |
| NA.                                         | 4       | -          |

## RT-PCR: Moving to GLH / Genomic hubs - ROS1fus

| RT-PCR: Moving to GLH / Genomic hubs - ROS1fus | Overall |           |
|------------------------------------------------|---------|-----------|
|                                                | n       | % (N = 2) |
| No                                             | 2       | 100%      |
| NA.                                            | 13      | -         |

## RT-PCR: Moving to GLH / Genomic hubs - ALKfus

| RT-PCR: Moving to GLH / Genomic hubs - ALKfus | Overall |           |
|-----------------------------------------------|---------|-----------|
|                                               | n       | % (N = 2) |
| No                                            | 2       | 100%      |
| NA.                                           | 13      | -         |

## RT-PCR: Moving to GLH / Genomic hubs - ALK

| RT-PCR: Moving to GLH / Genomic hubs - ALK | Overall |           |
|--------------------------------------------|---------|-----------|
|                                            | n       | % (N = 2) |
| No                                         | 2       | 100%      |
| NA.                                        | 13      | -         |

## RT-PCR: Moving to GLH / Genomic hubs - BRAF

| RT-PCR: Moving to GLH / Genomic hubs - BRAF | Overall |           |
|---------------------------------------------|---------|-----------|
|                                             | n       | % (N = 9) |
| No                                          | 9       | 100%      |
| NA.                                         | 6       | -         |

## RT-PCR: Moving to GLH / Genomic hubs - KRAS

| RT-PCR: Moving to GLH / Genomic hubs - KRAS | Overall |           |
|---------------------------------------------|---------|-----------|
|                                             | n       | % (N = 7) |
| No                                          | 7       | 100%      |
| NA.                                         | 8       | -         |

## RT-PCR: Moving to GLH / Genomic hubs - METex14

| RT-PCR: Moving to GLH / Genomic hubs - METex14 | Overall |           |
|------------------------------------------------|---------|-----------|
|                                                | n       | % (N = 6) |
| No                                             | 6       | 100%      |
| NA.                                            | 9       | -         |

## RT-PCR: Moving to GLH / Genomic hubs - HER2

| RT-PCR: Moving to GLH / Genomic hubs - HER2 | Overall |           |
|---------------------------------------------|---------|-----------|
|                                             | n       | % (N = 3) |
| No                                          | 3       | 100%      |
| NA.                                         | 12      | -         |

## RT-PCR: Moving to GLH / Genomic hubs - RETfus

| RT-PCR: Moving to GLH / Genomic hubs - RETfus | Overall |           |
|-----------------------------------------------|---------|-----------|
|                                               | n       | % (N = 5) |
| No                                            | 5       | 100%      |
| NA.                                           | 10      | -         |

## RT-PCR: Moving to GLH / Genomic hubs - NTRKfus

| RT-PCR: Moving to GLH / Genomic hubs - NTRKfus | Overall |  |
|------------------------------------------------|---------|--|
|------------------------------------------------|---------|--|

|     | n | % (N = 6) |
|-----|---|-----------|
| No  | 6 | 100%      |
| NA. | 9 | -         |

## RT-PCR: Current average turnaround time - EGFR

| RT-PCR: Current average turnaround time - EGFR | Overall  |
|------------------------------------------------|----------|
|                                                | N = 15   |
| Mean                                           | 7.5      |
| SD                                             | 8.4      |
| Median                                         | 6        |
| IQR                                            | 2 to 7.2 |
| Range                                          | 1 to 30  |
| NA.                                            | 4        |

## RT-PCR: Current average turnaround times - ROS1fus

| RT-PCR: Current average turnaround times - ROS1fus | Overall    |
|----------------------------------------------------|------------|
|                                                    | N = 15     |
| Mean                                               | 4.8        |
| SD                                                 | 3.9        |
| Median                                             | 4.8        |
| IQR                                                | 3.4 to 6.1 |
| Range                                              | 2 to 7.5   |
| NA.                                                | 13         |

## RT-PCR: Current average turnaround time - ALKfus

| RT-PCR: Current average turnaround time - ALKfus | Overall    |
|--------------------------------------------------|------------|
|                                                  | N = 15     |
| Mean                                             | 4.8        |
| SD                                               | 3.9        |
| Median                                           | 4.8        |
| IQR                                              | 3.4 to 6.1 |
| Range                                            | 2 to 7.5   |
| NA.                                              | 13         |

## RT-PCR: Current average turnaround time - ALK

| RT-PCR: Current average turnaround time - ALK | Overall    |
|-----------------------------------------------|------------|
|                                               | N = 15     |
| Mean                                          | 4.8        |
| SD                                            | 3.9        |
| Median                                        | 4.8        |
| IQR                                           | 3.4 to 6.1 |
| Range                                         | 2 to 7.5   |
| NA.                                           | 13         |

RT-PCR: Current average turnaround time - BRAF

| RT-PCR: Current average turnaround time - BRAF | Overall |
|------------------------------------------------|---------|
|                                                | N = 15  |
| Mean                                           | 10.6    |
| SD                                             | 11.2    |
| Median                                         | 7       |
| IQR                                            | 2 to 14 |
| Range                                          | 1 to 30 |
| NA.                                            | 6       |

RT-PCR: Current average turnaround time - KRAS

| RT-PCR: Current average turnaround time - KRAS | Overall |
|------------------------------------------------|---------|
|                                                | N = 15  |
| Mean                                           | 12.4    |
| SD                                             | 12.2    |
| Median                                         | 7.5     |
| IQR                                            | 3 to 21 |
| Range                                          | 1 to 30 |
| NA.                                            | 8       |

RT-PCR: Current average turnaround time - METex14

| RT-PCR: Current average turnaround time - METex14 | Overall     |
|---------------------------------------------------|-------------|
|                                                   | N = 15      |
| Mean                                              | 14.2        |
| SD                                                | 12.1        |
| Median                                            | 10.8        |
| IQR                                               | 4.9 to 24.5 |

|       |         |
|-------|---------|
| Range | 2 to 30 |
| NA.   | 9       |

## RT-PCR: Current average turnaround time - HER2

| RT-PCR: Current average turnaround time - HER2 | Overall     |
|------------------------------------------------|-------------|
|                                                | N = 15      |
| Mean                                           | 13.8        |
| SD                                             | 14.1        |
| Median                                         | 7.5         |
| IQR                                            | 5.8 to 18.8 |
| Range                                          | 4 to 30     |
| NA.                                            | 12          |

## RT-PCR: Current average turnaround time - RETfus

| RT-PCR: Current average turnaround time - RETfus | Overall |
|--------------------------------------------------|---------|
|                                                  | N = 15  |
| Mean                                             | 11.1    |
| SD                                               | 10.5    |
| Median                                           | 7.5     |
| IQR                                              | 4 to 14 |
| Range                                            | 2 to 28 |
| NA.                                              | 10      |

RT-PCR: Current average turnaround time -  
NTRKfus

| RT-PCR: Current average turnaround time -<br>NTRKfus | Overall |
|------------------------------------------------------|---------|
|                                                      | N = 15  |
| Mean                                                 | 11.1    |
| SD                                                   | 10.5    |
| Median                                               | 7.5     |
| IQR                                                  | 4 to 14 |
| Range                                                | 2 to 28 |
| NA.                                                  | 10      |

## NGS: Reflex at diagnosis - EGFR

| NGS: Reflex at diagnosis - EGFR | Overall |            |
|---------------------------------|---------|------------|
|                                 | n       | % (N = 15) |

|            |   |     |
|------------|---|-----|
| No         | 3 | 20% |
| On request | 3 | 20% |
| Yes        | 9 | 60% |
| NA.        | 0 | -   |

## NGS: Reflex at diagnosis - ROS1fus

| NGS: Reflex at diagnosis - ROS1fus | Overall |            |
|------------------------------------|---------|------------|
|                                    | n       | % (N = 15) |
| No                                 | 5       | 33%        |
| On request                         | 3       | 20%        |
| Yes                                | 7       | 47%        |
| NA.                                | 0       | -          |

## NGS: Reflex at diagnosis - ALKfus

| NGS: Reflex at diagnosis - ALKfus | Overall |            |
|-----------------------------------|---------|------------|
|                                   | n       | % (N = 15) |
| No                                | 4       | 27%        |
| On request                        | 3       | 20%        |
| Yes                               | 8       | 53%        |
| NA.                               | 0       | -          |

## NGS: Reflex at diagnosis - BRAF

| NGS: Reflex at diagnosis - BRAF | Overall |            |
|---------------------------------|---------|------------|
|                                 | n       | % (N = 15) |
| No                              | 3       | 20%        |
| On request                      | 3       | 20%        |
| Yes                             | 9       | 60%        |
| NA.                             | 0       | -          |

## NGS: Reflex at diagnosis - KRAS

| NGS: Reflex at diagnosis - KRAS | Overall |            |
|---------------------------------|---------|------------|
|                                 | n       | % (N = 15) |
| No                              | 3       | 20%        |
| On request                      | 3       | 20%        |
| Yes                             | 9       | 60%        |
| NA.                             | 0       | -          |



## NGS: Reflex at diagnosis - METex14

| NGS: Reflex at diagnosis - METex14 | Overall |            |
|------------------------------------|---------|------------|
|                                    | n       | % (N = 15) |
| No                                 | 4       | 27%        |
| On request                         | 3       | 20%        |
| Yes                                | 8       | 53%        |
| NA.                                | 0       | -          |

## NGS: Reflex at diagnosis - HER2

| NGS: Reflex at diagnosis - HER2 | Overall |            |
|---------------------------------|---------|------------|
|                                 | n       | % (N = 15) |
| No                              | 7       | 47%        |
| On request                      | 3       | 20%        |
| Yes                             | 5       | 33%        |
| NA.                             | 0       | -          |

## NGS: Reflex at diagnosis - RETfus

| NGS: Reflex at diagnosis - RETfus | Overall |            |
|-----------------------------------|---------|------------|
|                                   | n       | % (N = 15) |
| No                                | 4       | 27%        |
| On request                        | 3       | 20%        |
| Yes                               | 8       | 53%        |
| NA.                               | 0       | -          |

## NGS: Reflex at diagnosis - NTRKfus

| NGS: Reflex at diagnosis - NTRKfus | Overall |            |
|------------------------------------|---------|------------|
|                                    | n       | % (N = 15) |
| No                                 | 5       | 33%        |
| On request                         | 3       | 20%        |
| Yes                                | 7       | 47%        |
| NA.                                | 0       | -          |

NGS: Testing at progression / relapse / other post  
Dx timepoints - EGFR

| NGS: Testing at progression / relapse / other post<br>Dx timepoints - EGFR | Overall |  |
|----------------------------------------------------------------------------|---------|--|
|                                                                            |         |  |

|            | n | % (N = 15) |
|------------|---|------------|
| No         | 7 | 47%        |
| On request | 8 | 53%        |
| NA.        | 0 | -          |

NGS: Testing at progression / relapse / other post  
Dx timepoints - ROS1fus

| NGS: Testing at progression / relapse / other post<br>Dx timepoints - ROS1fus | Overall |            |
|-------------------------------------------------------------------------------|---------|------------|
|                                                                               | n       | % (N = 15) |
| No                                                                            | 8       | 53%        |
| On request                                                                    | 7       | 47%        |
| NA.                                                                           | 0       | -          |

NGS: Testing at progression / relapse / other post  
Dx timepointss - ALKfus

| NGS: Testing at progression / relapse / other post<br>Dx timepointss - ALKfus | Overall |            |
|-------------------------------------------------------------------------------|---------|------------|
|                                                                               | n       | % (N = 15) |
| No                                                                            | 8       | 53%        |
| On request                                                                    | 7       | 47%        |
| NA.                                                                           | 0       | -          |

NGS: Testing at progression / relapse / other post  
Dx timepointss - BRAF

| NGS: Testing at progression / relapse / other post<br>Dx timepointss - BRAF | Overall |            |
|-----------------------------------------------------------------------------|---------|------------|
|                                                                             | n       | % (N = 15) |
| No                                                                          | 8       | 53%        |
| On request                                                                  | 7       | 47%        |
| NA.                                                                         | 0       | -          |

NGS: Testing at progression / relapse / other post  
Dx timepoints - KRAS

| NGS: Testing at progression / relapse / other post<br>Dx timepoints - KRAS | Overall |            |
|----------------------------------------------------------------------------|---------|------------|
|                                                                            | n       | % (N = 15) |
| No                                                                         | 8       | 53%        |

|            |   |     |
|------------|---|-----|
| On request | 7 | 47% |
| NA.        | 0 | -   |

NGS: Testing at progression / relapse / other post  
Dx timepoints - METex14

| NGS: Testing at progression / relapse / other post<br>Dx timepoints - METex14 | Overall |            |
|-------------------------------------------------------------------------------|---------|------------|
|                                                                               | n       | % (N = 15) |
| No                                                                            | 8       | 53%        |
| On request                                                                    | 7       | 47%        |
| NA.                                                                           | 0       | -          |

NGS: Testing at progression / relapse / other post  
Dx timepoints - HER2

| NGS: Testing at progression / relapse / other post<br>Dx timepoints - HER2 | Overall |            |
|----------------------------------------------------------------------------|---------|------------|
|                                                                            | n       | % (N = 15) |
| No                                                                         | 9       | 60%        |
| On request                                                                 | 6       | 40%        |
| NA.                                                                        | 0       | -          |

NGS: Testing at progression / relapse / other post  
Dx timepointss - RETfus

| NGS: Testing at progression / relapse / other post<br>Dx timepointss - RETfus | Overall |            |
|-------------------------------------------------------------------------------|---------|------------|
|                                                                               | n       | % (N = 15) |
| No                                                                            | 8       | 53%        |
| On request                                                                    | 7       | 47%        |
| NA.                                                                           | 0       | -          |

NGS: Testing at progression / relapse / other post  
Dx timepoints - NTRKfus

| NGS: Testing at progression / relapse / other post<br>Dx timepoints - NTRKfus | Overall |            |
|-------------------------------------------------------------------------------|---------|------------|
|                                                                               | n       | % (N = 15) |
| No                                                                            | 8       | 53%        |
| On request                                                                    | 7       | 47%        |
| NA.                                                                           | 0       | -          |

## NGS: Performed by pathology lab - EGFR

| NGS: Performed by pathology lab - EGFR | Overall |            |
|----------------------------------------|---------|------------|
|                                        | n       | % (N = 12) |
| No                                     | 10      | 83%        |
| Yes                                    | 2       | 17%        |
| NA.                                    | 3       | -          |

## NGS: Performed by pathology lab - ROS1fus

| NGS: Performed by pathology lab - ROS1fus | Overall |            |
|-------------------------------------------|---------|------------|
|                                           | n       | % (N = 10) |
| No                                        | 10      | 100%       |
| NA.                                       | 5       | -          |

## NGS: Performed by pathology lab - ALKfus

| NGS: Performed by pathology lab - ALKfus | Overall |            |
|------------------------------------------|---------|------------|
|                                          | n       | % (N = 11) |
| No                                       | 11      | 100%       |
| NA.                                      | 4       | -          |

## RT-PCR: Performed by pathology lab - BRAF...151

| RT-PCR: Performed by pathology lab - BRAF...151 | Overall |            |
|-------------------------------------------------|---------|------------|
|                                                 | n       | % (N = 12) |
| No                                              | 11      | 92%        |
| Yes                                             | 1       | 8%         |
| NA.                                             | 3       | -          |

## NGS: Performed by pathology lab - KRAS

| NGS: Performed by pathology lab - KRAS | Overall |            |
|----------------------------------------|---------|------------|
|                                        | n       | % (N = 12) |
| No                                     | 11      | 92%        |
| Yes                                    | 1       | 8%         |
| NA.                                    | 3       | -          |

## NGS: Performed by pathology lab - METex14

| NGS: Performed by pathology lab - METex14 | Overall |            |
|-------------------------------------------|---------|------------|
|                                           | n       | % (N = 11) |
| No                                        | 10      | 91%        |
| Yes                                       | 1       | 9%         |
| NA.                                       | 4       | -          |

## NGS: Performed by pathology lab - HER2

| NGS: Performed by pathology lab - HER2 | Overall |           |
|----------------------------------------|---------|-----------|
|                                        | n       | % (N = 8) |
| No                                     | 8       | 100%      |
| NA.                                    | 7       | -         |

## NGS: Performed by pathology lab - RETfus

| NGS: Performed by pathology lab - RETfus | Overall |            |
|------------------------------------------|---------|------------|
|                                          | n       | % (N = 11) |
| No                                       | 11      | 100%       |
| NA.                                      | 4       | -          |

## NGS: Performed by pathology lab - NTRKfus

| NGS: Performed by pathology lab - NTRKfus | Overall |            |
|-------------------------------------------|---------|------------|
|                                           | n       | % (N = 10) |
| No                                        | 10      | 100%       |
| NA.                                       | 5       | -          |

## NGS: Moved to GLH / Genomic Centre - EGFR

| NGS: Moved to GLH / Genomic Centre - EGFR | Overall |            |
|-------------------------------------------|---------|------------|
|                                           | n       | % (N = 12) |
| No                                        | 2       | 17%        |
| Yes                                       | 10      | 83%        |
| NA.                                       | 3       | -          |

## NGS: Moved to GLH / Genomic Centre - ROS1fus

| NGS: Moved to GLH / Genomic Centre - ROS1fus | Overall |            |
|----------------------------------------------|---------|------------|
|                                              | n       | % (N = 10) |
| Yes                                          | 10      | 100%       |
| NA.                                          | 5       | -          |

## NGS: Moved to GLH / Genomic Centre - ALKfus

| NGS: Moved to GLH / Genomic Centre - ALKfus | Overall |            |
|---------------------------------------------|---------|------------|
|                                             | n       | % (N = 11) |
| Yes                                         | 11      | 100%       |
| NA.                                         | 4       | -          |

## NGS: Moved to GLH / Genomic Centre - BRAF

| NGS: Moved to GLH / Genomic Centre - BRAF | Overall |            |
|-------------------------------------------|---------|------------|
|                                           | n       | % (N = 12) |
| No                                        | 1       | 8%         |
| Yes                                       | 11      | 92%        |
| NA.                                       | 3       | -          |

## NGS: Moved to GLH / Genomic Centre - KRAS

| NGS: Moved to GLH / Genomic Centre - KRAS | Overall |            |
|-------------------------------------------|---------|------------|
|                                           | n       | % (N = 12) |
| No                                        | 1       | 8%         |
| Yes                                       | 11      | 92%        |
| NA.                                       | 3       | -          |

## NGS: Moved to GLH / Genomic Centre - METex14

| NGS: Moved to GLH / Genomic Centre - METex14 | Overall |            |
|----------------------------------------------|---------|------------|
|                                              | n       | % (N = 11) |
| No                                           | 1       | 9%         |
| Yes                                          | 10      | 91%        |

|     |   |   |
|-----|---|---|
| NA. | 4 | - |
|-----|---|---|

## NGS: Moved to GLH / Genomic Centre - HER2

| NGS: Moved to GLH / Genomic Centre - HER2 | Overall |           |
|-------------------------------------------|---------|-----------|
|                                           | n       | % (N = 8) |
| Yes                                       | 8       | 100%      |
| NA.                                       | 7       | -         |

## NGS: Moved to GLH / Genomic Centre - RETfus

| NGS: Moved to GLH / Genomic Centre - RETfus | Overall |            |
|---------------------------------------------|---------|------------|
|                                             | n       | % (N = 11) |
| Yes                                         | 11      | 100%       |
| NA.                                         | 4       | -          |

## NGS: Moved to GLH / Genomic Centre - NTRKfus

| NGS: Moved to GLH / Genomic Centre - NTRKfus | Overall |            |
|----------------------------------------------|---------|------------|
|                                              | n       | % (N = 10) |
| Yes                                          | 10      | 100%       |
| NA.                                          | 5       | -          |

## NGS: Moving to GLH / Genomic hubs - EGFR

| NGS: Moving to GLH / Genomic hubs - EGFR | Overall |            |
|------------------------------------------|---------|------------|
|                                          | n       | % (N = 12) |
| No                                       | 12      | 100%       |
| NA.                                      | 3       | -          |

## NGS: Moving to GLH / Genomic hubs - ROS1fus

| NGS: Moving to GLH / Genomic hubs - ROS1fus | Overall |            |
|---------------------------------------------|---------|------------|
|                                             | n       | % (N = 10) |

|     |    |      |
|-----|----|------|
| No  | 10 | 100% |
| NA. | 5  | -    |

## NGS: Moving to GLH / Genomic hubs - ALKfus

| NGS: Moving to GLH / Genomic hubs - ALKfus | Overall |            |
|--------------------------------------------|---------|------------|
|                                            | n       | % (N = 11) |
| No                                         | 11      | 100%       |
| NA.                                        | 4       | -          |

## NGS: Moving to GLH / Genomic hubs - BRAF

| NGS: Moving to GLH / Genomic hubs - BRAF | Overall |            |
|------------------------------------------|---------|------------|
|                                          | n       | % (N = 12) |
| No                                       | 12      | 100%       |
| NA.                                      | 3       | -          |

## NGS: Moving to GLH / Genomic hubs - KRAS

| NGS: Moving to GLH / Genomic hubs - KRAS | Overall |            |
|------------------------------------------|---------|------------|
|                                          | n       | % (N = 12) |
| No                                       | 12      | 100%       |
| NA.                                      | 3       | -          |

## NGS: Moving to GLH / Genomic hubs - METex14

| NGS: Moving to GLH / Genomic hubs - METex14 | Overall |            |
|---------------------------------------------|---------|------------|
|                                             | n       | % (N = 11) |
| No                                          | 11      | 100%       |
| NA.                                         | 4       | -          |

## NGS: Moving to GLH / Genomic hubs - HER2

| NGS: Moving to GLH / Genomic hubs - HER2 | Overall |           |
|------------------------------------------|---------|-----------|
|                                          | n       | % (N = 8) |
| No                                       | 8       | 100%      |
| NA.                                      | 7       | -         |



## NGS: Moving to GLH / Genomic hubs - RETfus

| NGS: Moving to GLH / Genomic hubs - RETfus | Overall |            |
|--------------------------------------------|---------|------------|
|                                            | n       | % (N = 11) |
| No                                         | 11      | 100%       |
| NA.                                        | 4       | -          |

## NGS: Moving to GLH / Genomic hubs - NTRKfus

| NGS: Moving to GLH / Genomic hubs - NTRKfus | Overall |            |
|---------------------------------------------|---------|------------|
|                                             | n       | % (N = 10) |
| No                                          | 10      | 100%       |
| NA.                                         | 5       | -          |

## NGS: Current average turnaround time - EGFR

| NGS: Current average turnaround time - EGFR | Overall     |
|---------------------------------------------|-------------|
|                                             | N = 15      |
| Mean                                        | 16.9        |
| SD                                          | 6           |
| Median                                      | 17.5        |
| IQR                                         | 13 to 21.8  |
| Range                                       | 7.5 to 24.5 |
| NA.                                         | 4           |

## NGS: Current average turnaround times - ROS1fus

| NGS: Current average turnaround times - ROS1fus | Overall    |
|-------------------------------------------------|------------|
|                                                 | N = 15     |
| Mean                                            | 19.2       |
| SD                                              | 5.6        |
| Median                                          | 19         |
| IQR                                             | 14 to 24.5 |
| Range                                           | 10 to 24.5 |
| NA.                                             | 6          |

## NGS: Current average turnaround time - ALKfus

| NGS: Current average turnaround time - ALKfus | Overall    |
|-----------------------------------------------|------------|
|                                               | N = 15     |
| Mean                                          | 18.5       |
| SD                                            | 5.8        |
| Median                                        | 18.5       |
| IQR                                           | 14 to 24.5 |
| Range                                         | 10 to 24.5 |
| NA.                                           | 5          |

NGS: Current average turnaround time - BRAF

| NGS: Current average turnaround time - BRAF | Overall     |
|---------------------------------------------|-------------|
|                                             | N = 15      |
| Mean                                        | 16.9        |
| SD                                          | 6           |
| Median                                      | 17.5        |
| IQR                                         | 13 to 21.8  |
| Range                                       | 7.5 to 24.5 |
| NA.                                         | 4           |

NGS: Current average turnaround time - KRAS

| NGS: Current average turnaround time - KRAS | Overall     |
|---------------------------------------------|-------------|
|                                             | N = 15      |
| Mean                                        | 16.9        |
| SD                                          | 6           |
| Median                                      | 17.5        |
| IQR                                         | 13 to 21.8  |
| Range                                       | 7.5 to 24.5 |
| NA.                                         | 4           |

NGS: Current average turnaround time - METex14

| NGS: Current average turnaround time - METex14 | Overall     |
|------------------------------------------------|-------------|
|                                                | N = 15      |
| Mean                                           | 17.4        |
| SD                                             | 6.1         |
| Median                                         | 17.8        |
| IQR                                            | 14 to 23.1  |
| Range                                          | 7.5 to 24.5 |
| NA.                                            | 5           |

## NGS: Current average turnaround time - HER2

| NGS: Current average turnaround time - HER2 | Overall    |
|---------------------------------------------|------------|
|                                             | N = 15     |
| Mean                                        | 17.5       |
| SD                                          | 5.5        |
| Median                                      | 17.5       |
| IQR                                         | 14 to 21.2 |
| Range                                       | 10 to 24.5 |
| NA.                                         | 8          |

## NGS: Current average turnaround time - RETfus

| NGS: Current average turnaround time - RETfus | Overall    |
|-----------------------------------------------|------------|
|                                               | N = 15     |
| Mean                                          | 18.5       |
| SD                                            | 5.8        |
| Median                                        | 18.5       |
| IQR                                           | 14 to 24.5 |
| Range                                         | 10 to 24.5 |
| NA.                                           | 5          |

## NGS: Current average turnaround time - NTRKfus

| NGS: Current average turnaround time - NTRKfus | Overall    |
|------------------------------------------------|------------|
|                                                | N = 15     |
| Mean                                           | 19.2       |
| SD                                             | 5.6        |
| Median                                         | 19         |
| IQR                                            | 14 to 24.5 |
| Range                                          | 10 to 24.5 |
| NA.                                            | 6          |

## Others

| Others       | Overall |            |
|--------------|---------|------------|
|              | n       | % (N = 15) |
| N/A          | 14      | 93%        |
| PIK3CA, TP53 | 1       | 7%         |
| NA.          | 0       | -          |

## Reflex at diagnosis : Others - PIK3CA

| Reflex at diagnosis : Others - PIK3CA | Overall |            |
|---------------------------------------|---------|------------|
|                                       | n       | % (N = 15) |
| N/A                                   | 14      | 93%        |
| Yes                                   | 1       | 7%         |
| NA.                                   | 0       | -          |

## Testing at progression/ relapse/ other post Dx timepoints: Others - PIK3CA

| Testing at progression/ relapse/ other post Dx timepoints: Others - PIK3CA | Overall |            |
|----------------------------------------------------------------------------|---------|------------|
|                                                                            | n       | % (N = 15) |
| N/A                                                                        | 14      | 93%        |
| No                                                                         | 1       | 7%         |
| NA.                                                                        | 0       | -          |

## Performed by pathology lab: Others - PIK3CA

| Performed by pathology lab: Others - PIK3CA | Overall |            |
|---------------------------------------------|---------|------------|
|                                             | n       | % (N = 15) |
| N/A                                         | 14      | 93%        |
| No                                          | 1       | 7%         |
| NA.                                         | 0       | -          |

## Moved to GLH/ Genomic centre: Others - PIK3CA

| Moved to GLH/ Genomic centre: Others - PIK3CA | Overall |            |
|-----------------------------------------------|---------|------------|
|                                               | n       | % (N = 15) |
| N/A                                           | 14      | 93%        |
| Yes                                           | 1       | 7%         |
| NA.                                           | 0       | -          |

## Moving to GLH/ Genomic hub: Others - PIK3CA

| Moving to GLH/ Genomic hub: Others - PIK3CA | Overall |            |
|---------------------------------------------|---------|------------|
|                                             | n       | % (N = 15) |

|     |    |     |
|-----|----|-----|
| N/A | 14 | 93% |
| No  | 1  | 7%  |
| NA. | 0  | -   |

## Current Average Turnaround time - PIK3CA

| Current Average Turnaround time - PIK3CA | Overall |            |
|------------------------------------------|---------|------------|
|                                          | n       | % (N = 15) |
| 10 to 14                                 | 1       | 7%         |
| N/A                                      | 14      | 93%        |
| NA.                                      | 0       | -          |

## Reflex at diagnosis : Others - TP53

| Reflex at diagnosis : Others - TP53 | Overall |            |
|-------------------------------------|---------|------------|
|                                     | n       | % (N = 15) |
| N/A                                 | 14      | 93%        |
| Yes                                 | 1       | 7%         |
| NA.                                 | 0       | -          |

Testing at progression/ relapse/ other post Dx  
timepoints: Others - TP53

| Testing at progression/ relapse/ other post Dx<br>timepoints: Others - TP53 | Overall |            |
|-----------------------------------------------------------------------------|---------|------------|
|                                                                             | n       | % (N = 15) |
| N/A                                                                         | 14      | 93%        |
| No                                                                          | 1       | 7%         |
| NA.                                                                         | 0       | -          |

## Performed by pathology lab: Others - TP53

| Performed by pathology lab: Others - TP53 | Overall |            |
|-------------------------------------------|---------|------------|
|                                           | n       | % (N = 15) |
| N/A                                       | 14      | 93%        |
| No                                        | 1       | 7%         |
| NA.                                       | 0       | -          |

## Moved to GLH/ Genomic centre: Others - TP53

| Moved to GLH/ Genomic centre: Others - TP53 | Overall |            |
|---------------------------------------------|---------|------------|
|                                             | n       | % (N = 15) |
| N/A                                         | 14      | 93%        |
| Yes                                         | 1       | 7%         |
| NA.                                         | 0       | -          |

## Moving to GLH/ Genomic hub: Others - TP53

| Moving to GLH/ Genomic hub: Others - TP53 | Overall |            |
|-------------------------------------------|---------|------------|
|                                           | n       | % (N = 15) |
| N/A                                       | 14      | 93%        |
| No                                        | 1       | 7%         |
| NA.                                       | 0       | -          |

## Current Average Turnaround time - TP53

| Current Average Turnaround time - TP53 | Overall |            |
|----------------------------------------|---------|------------|
|                                        | n       | % (N = 15) |
| 10 to 14                               | 1       | 7%         |
| N/A                                    | 14      | 93%        |
| NA.                                    | 0       | -          |

## IHC: Reflex at diagnosis - BRAF

| IHC: Reflex at diagnosis - BRAF | Overall |            |
|---------------------------------|---------|------------|
|                                 | n       | % (N = 11) |
| No                              | 8       | 73%        |
| On request                      | 3       | 27%        |
| NA.                             | 0       | -          |

## IHC: Reflex at diagnosis - PD-L1

| IHC: Reflex at diagnosis - PD-L1 | Overall |            |
|----------------------------------|---------|------------|
|                                  | n       | % (N = 11) |
| No                               | 9       | 82%        |
| On request                       | 2       | 18%        |
| NA.                              | 0       | -          |

## IHC: Testing at progression / relapse / other post Dx timepoints - BRAF

| IHC: Testing at progression / relapse / other post Dx timepoints - BRAF | Overall |            |
|-------------------------------------------------------------------------|---------|------------|
|                                                                         | n       | % (N = 11) |
| No                                                                      | 9       | 82%        |
| On request                                                              | 2       | 18%        |
| NA.                                                                     | 0       | -          |

## IHC: Testing at progression / relapse / other post Dx timepoints - PD-L1

| IHC: Testing at progression / relapse / other post Dx timepoints - PD-L1 | Overall |            |
|--------------------------------------------------------------------------|---------|------------|
|                                                                          | n       | % (N = 11) |
| No                                                                       | 9       | 82%        |
| On request                                                               | 2       | 18%        |
| NA.                                                                      | 0       | -          |

## IHC: Performed by pathology lab - BRAF

| IHC: Performed by pathology lab - BRAF | Overall |           |
|----------------------------------------|---------|-----------|
|                                        | n       | % (N = 3) |
| Other external lab                     | 2       | 67%       |

|     |   |     |
|-----|---|-----|
| Yes | 1 | 33% |
| NA. | 8 | -   |

## IHC: Performed by pathology lab - PD-L1

| IHC: Performed by pathology lab - PD-L1 | Overall |           |
|-----------------------------------------|---------|-----------|
|                                         | n       | % (N = 2) |
| Other external lab                      | 1       | 50%       |
| Yes                                     | 1       | 50%       |
| NA.                                     | 9       | -         |

## IHC: Moved to GLH / Genomic Centre - BRAF

| IHC: Moved to GLH / Genomic Centre - BRAF | Overall |           |
|-------------------------------------------|---------|-----------|
|                                           | n       | % (N = 3) |
| No                                        | 3       | 100%      |
| NA.                                       | 8       | -         |

## IHC: Moved to GLH / Genomic Centre - PD-L1

| IHC: Moved to GLH / Genomic Centre - PD-L1 | Overall |           |
|--------------------------------------------|---------|-----------|
|                                            | n       | % (N = 2) |
| No                                         | 2       | 100%      |
| NA.                                        | 9       | -         |

## IHC: Moving to GLH / Genomic hubs - BRAF

| IHC: Moving to GLH / Genomic hubs - BRAF | Overall |           |
|------------------------------------------|---------|-----------|
|                                          | n       | % (N = 3) |
| No                                       | 3       | 100%      |
| NA.                                      | 8       | -         |

## IHC: Moving to GLH / Genomic hubs - PD-L1

| IHC: Moving to GLH / Genomic hubs - PD-L1 | Overall |           |
|-------------------------------------------|---------|-----------|
|                                           | n       | % (N = 2) |
| No                                        | 2       | 100%      |
| NA.                                       | 9       | -         |



## IHC: Current average turnaround time - BRAF

| IHC: Current average turnaround time - BRAF | Overall     |
|---------------------------------------------|-------------|
|                                             | N = 11      |
| Mean                                        | 13          |
| SD                                          | 14.9        |
| Median                                      | 7           |
| IQR                                         | 4.5 to 18.5 |
| Range                                       | 2 to 30     |
| NA.                                         | 8           |

## IHC: Current average turnaround time - PD-L1

| IHC: Current average turnaround time - PD-L1 | Overall      |
|----------------------------------------------|--------------|
|                                              | N = 11       |
| Mean                                         | 17           |
| SD                                           | 18.4         |
| Median                                       | 17           |
| IQR                                          | 10.5 to 23.5 |
| Range                                        | 4 to 30      |
| NA.                                          | 9            |

## Sanger Sequencing: Reflex at diagnosis - BRAF

| Sanger Sequencing: Reflex at diagnosis - BRAF | Overall |            |
|-----------------------------------------------|---------|------------|
|                                               | n       | % (N = 11) |
| No                                            | 10      | 91%        |
| On request                                    | 1       | 9%         |
| NA.                                           | 0       | -          |

## Sanger Sequencing: Reflex at diagnosis - NRAS

| Sanger Sequencing: Reflex at diagnosis - NRAS | Overall |            |
|-----------------------------------------------|---------|------------|
|                                               | n       | % (N = 11) |
| No                                            | 11      | 100%       |
| NA.                                           | 0       | -          |

## Sanger Sequencing: Testing at progression / relapse / other post Dx timepoints - BRAF

| Sanger Sequencing: Testing at progression / relapse / other post Dx timepoints - BRAF | Overall |            |
|---------------------------------------------------------------------------------------|---------|------------|
|                                                                                       | n       | % (N = 11) |

|            |    |     |
|------------|----|-----|
| No         | 10 | 91% |
| On request | 1  | 9%  |
| NA.        | 0  | -   |

Sanger Sequencing: Testing at progression / relapse / other post Dx timepoints - NRAS

| Sanger Sequencing: Testing at progression / relapse / other post Dx timepoints - NRAS | Overall |            |
|---------------------------------------------------------------------------------------|---------|------------|
|                                                                                       | n       | % (N = 11) |
| No                                                                                    | 11      | 100%       |
| NA.                                                                                   | 0       | -          |

Sanger Sequencing: Performed by pathology lab - BRAF

| Sanger Sequencing: Performed by pathology lab - BRAF | Overall |           |
|------------------------------------------------------|---------|-----------|
|                                                      | n       | % (N = 1) |
| Other external lab                                   | 1       | 100%      |
| NA.                                                  | 10      | -         |

Sanger Sequencing: Moved to GLH / Genomic Centre - BRAF

| Sanger Sequencing: Moved to GLH / Genomic Centre - BRAF | Overall |           |
|---------------------------------------------------------|---------|-----------|
|                                                         | n       | % (N = 1) |
| No                                                      | 1       | 100%      |
| NA.                                                     | 10      | -         |

Sanger Sequencing: Moving to GLH / Genomic hubs - BRAF

| Sanger Sequencing: Moving to GLH / Genomic hubs - BRAF | Overall |           |
|--------------------------------------------------------|---------|-----------|
|                                                        | n       | % (N = 1) |
| No                                                     | 1       | 100%      |
| NA.                                                    | 10      | -         |

Sanger Sequencing: Current average turnaround time - BRAF

| Sanger Sequencing: Current average turnaround time - BRAF | Overall |           |
|-----------------------------------------------------------|---------|-----------|
|                                                           | n       | % (N = 1) |
| 7                                                         | 1       | 100%      |
| NA.                                                       | 10      | -         |

Pyrosequencing: Reflex at diagnosis - BRAF

| Pyrosequencing: Reflex at diagnosis - BRAF | Overall |            |
|--------------------------------------------|---------|------------|
|                                            | n       | % (N = 11) |
| No                                         | 11      | 100%       |
| NA.                                        | 0       | -          |

Pyrosequencing: Testing at progression / relapse / other post Dx timepoints - BRAF

| Pyrosequencing: Testing at progression / relapse / other post Dx timepoints - BRAF | Overall |            |
|------------------------------------------------------------------------------------|---------|------------|
|                                                                                    | n       | % (N = 11) |
| No                                                                                 | 11      | 100%       |
| NA.                                                                                | 0       | -          |

RT-PCR: Reflex at diagnosis - BRAF

| RT-PCR: Reflex at diagnosis - BRAF | Overall |            |
|------------------------------------|---------|------------|
|                                    | n       | % (N = 11) |
| No                                 | 2       | 18%        |
| On request                         | 1       | 9%         |
| Yes                                | 8       | 73%        |
| NA.                                | 0       | -          |

RT-PCR: Reflex at diagnosis - NRAS

| RT-PCR: Reflex at diagnosis - NRAS | Overall |            |
|------------------------------------|---------|------------|
|                                    | n       | % (N = 11) |
| No                                 | 8       | 73%        |
| On request                         | 2       | 18%        |
| Yes                                | 1       | 9%         |
| NA.                                | 0       | -          |

## RT-PCR: Reflex at diagnosis - KIT

| RT-PCR: Reflex at diagnosis - KIT | Overall |            |
|-----------------------------------|---------|------------|
|                                   | n       | % (N = 11) |
| No                                | 9       | 82%        |
| On request                        | 2       | 18%        |
| NA.                               | 0       | -          |

## RT-PCR: Testing at progression / relapse / other post Dx timepointss - BRAF

| RT-PCR: Testing at progression / relapse / other post Dx timepointss - BRAF | Overall |            |
|-----------------------------------------------------------------------------|---------|------------|
|                                                                             | n       | % (N = 11) |
| No                                                                          | 7       | 64%        |
| On request                                                                  | 2       | 18%        |
| Yes                                                                         | 2       | 18%        |
| NA.                                                                         | 0       | -          |

## RT-PCR: Testing at progression / relapse / other post Dx timepointss - NRAS

| RT-PCR: Testing at progression / relapse / other post Dx timepointss - NRAS | Overall |            |
|-----------------------------------------------------------------------------|---------|------------|
|                                                                             | n       | % (N = 11) |
| No                                                                          | 9       | 82%        |
| On request                                                                  | 1       | 9%         |
| Yes                                                                         | 1       | 9%         |
| NA.                                                                         | 0       | -          |

## RT-PCR: Testing at progression / relapse / other post Dx timepointss - KIT

| RT-PCR: Testing at progression / relapse / other post Dx timepointss - KIT | Overall |            |
|----------------------------------------------------------------------------|---------|------------|
|                                                                            | n       | % (N = 11) |
| No                                                                         | 10      | 91%        |
| On request                                                                 | 1       | 9%         |
| NA.                                                                        | 0       | -          |

## RT-PCR: Performed by pathology lab - BRAF

| RT-PCR: Performed by pathology lab - BRAF | Overall |           |
|-------------------------------------------|---------|-----------|
|                                           | n       | % (N = 9) |
| No                                        | 1       | 11%       |
| Other external lab                        | 2       | 22%       |
| Yes                                       | 6       | 67%       |
| NA.                                       | 2       | -         |

## RT-PCR: Performed by pathology lab - NRAS

| RT-PCR: Performed by pathology lab - NRAS | Overall |           |
|-------------------------------------------|---------|-----------|
|                                           | n       | % (N = 2) |
| Other external lab                        | 1       | 50%       |
| Yes                                       | 1       | 50%       |
| NA.                                       | 9       | -         |

## RT-PCR: Performed by pathology lab - KIT

| RT-PCR: Performed by pathology lab - KIT | Overall |           |
|------------------------------------------|---------|-----------|
|                                          | n       | % (N = 1) |
| Other external lab                       | 1       | 100%      |
| NA.                                      | 10      | -         |

## RT-PCR: Moved to GLH / Genomic Centre - BRAF

| RT-PCR: Moved to GLH / Genomic Centre - BRAF | Overall |           |
|----------------------------------------------|---------|-----------|
|                                              | n       | % (N = 9) |
| No                                           | 8       | 89%       |
| Yes                                          | 1       | 11%       |
| NA.                                          | 2       | -         |

## RT-PCR: Moved to GLH / Genomic Centre - NRAS

| RT-PCR: Moved to GLH / Genomic Centre - NRAS | Overall |           |
|----------------------------------------------|---------|-----------|
|                                              | n       | % (N = 3) |
| No                                           | 3       | 100%      |
| NA.                                          | 8       | -         |

## RT-PCR: Moved to GLH / Genomic Centre - KIT

| RT-PCR: Moved to GLH / Genomic Centre - KIT | Overall |           |
|---------------------------------------------|---------|-----------|
|                                             | n       | % (N = 2) |
| No                                          | 2       | 100%      |
| NA.                                         | 9       | -         |

## RT-PCR: Moving to GLH / Genomic hubs - BRAF

| RT-PCR: Moving to GLH / Genomic hubs - BRAF | Overall |           |
|---------------------------------------------|---------|-----------|
|                                             | n       | % (N = 9) |
| No                                          | 9       | 100%      |
| NA.                                         | 2       | -         |

## RT-PCR: Moving to GLH / Genomic hubs - NRAS

| RT-PCR: Moving to GLH / Genomic hubs - NRAS | Overall |           |
|---------------------------------------------|---------|-----------|
|                                             | n       | % (N = 3) |
| No                                          | 3       | 100%      |
| NA.                                         | 8       | -         |

## RT-PCR: Moving to GLH / Genomic hubs - KIT

| RT-PCR: Moving to GLH / Genomic hubs - KIT | Overall |           |
|--------------------------------------------|---------|-----------|
|                                            | n       | % (N = 2) |
| No                                         | 2       | 100%      |
| NA.                                        | 9       | -         |

## RT-PCR: Current average turnaround time - BRAF

| RT-PCR: Current average turnaround time - BRAF | Overall    |
|------------------------------------------------|------------|
|                                                | N = 11     |
| Mean                                           | 7.5        |
| SD                                             | 8.9        |
| Median                                         | 6          |
| IQR                                            | 2.5 to 7.5 |
| Range                                          | 1 to 30    |
| NA.                                            | 2          |

## RT-PCR: Current average turnaround time - NRAS

| RT-PCR: Current average turnaround time - NRAS | Overall     |
|------------------------------------------------|-------------|
|                                                | N = 11      |
| Mean                                           | 17.8        |
| SD                                             | 21          |
| Median                                         | 7.5         |
| IQR                                            | 5.8 to 24.8 |
| Range                                          | 4 to 42     |
| NA.                                            | 8           |

## RT-PCR: Current average turnaround time - KIT

| RT-PCR: Current average turnaround time - KIT | Overall      |
|-----------------------------------------------|--------------|
|                                               | N = 11       |
| Mean                                          | 23           |
| SD                                            | 26.9         |
| Median                                        | 23           |
| IQR                                           | 13.5 to 32.5 |
| Range                                         | 4 to 42      |
| NA.                                           | 9            |

## NGS: Reflex at diagnosis - BRAF

| NGS: Reflex at diagnosis - BRAF | Overall |            |
|---------------------------------|---------|------------|
|                                 | n       | % (N = 11) |
| No                              | 4       | 36%        |
| On request                      | 5       | 45%        |
| Yes                             | 2       | 18%        |
| NA.                             | 0       | -          |

## NGS: Reflex at diagnosis - NRAS

| NGS: Reflex at diagnosis - NRAS | Overall |            |
|---------------------------------|---------|------------|
|                                 | n       | % (N = 11) |
| No                              | 3       | 27%        |
| On request                      | 6       | 55%        |
| Yes                             | 2       | 18%        |
| NA.                             | 0       | -          |

## NGS: Reflex at diagnosis - KIT

| NGS: Reflex at diagnosis - KIT | Overall |            |
|--------------------------------|---------|------------|
|                                | n       | % (N = 11) |
| No                             | 3       | 27%        |
| On request                     | 6       | 55%        |

|     |   |     |
|-----|---|-----|
| Yes | 2 | 18% |
| NA. | 0 | -   |

NGS: Testing at progression / relapse / other post Dx  
timepointss - BRAF

| NGS: Testing at progression / relapse / other post Dx<br>timepointss - BRAF | Overall |            |
|-----------------------------------------------------------------------------|---------|------------|
|                                                                             | n       | % (N = 11) |
| No                                                                          | 9       | 82%        |
| On request                                                                  | 2       | 18%        |
| NA.                                                                         | 0       | -          |

NGS: Testing at progression / relapse / other post Dx  
timepointss - NRAS

| NGS: Testing at progression / relapse / other post Dx<br>timepointss - NRAS | Overall |            |
|-----------------------------------------------------------------------------|---------|------------|
|                                                                             | n       | % (N = 11) |
| No                                                                          | 9       | 82%        |
| On request                                                                  | 2       | 18%        |
| NA.                                                                         | 0       | -          |

NGS: Testing at progression / relapse / other post Dx  
timepointss - KIT

| NGS: Testing at progression / relapse / other post Dx<br>timepointss - KIT | Overall |            |
|----------------------------------------------------------------------------|---------|------------|
|                                                                            | n       | % (N = 11) |
| No                                                                         | 9       | 82%        |
| On request                                                                 | 2       | 18%        |
| NA.                                                                        | 0       | -          |

NGS: Performed by pathology lab - BRAF

| NGS: Performed by pathology lab - BRAF | Overall |           |
|----------------------------------------|---------|-----------|
|                                        | n       | % (N = 7) |
| No                                     | 6       | 86%       |
| Yes                                    | 1       | 14%       |
| NA.                                    | 4       | -         |



## NGS: Performed by pathology lab - NRAS

| NGS: Performed by pathology lab - NRAS | Overall |           |
|----------------------------------------|---------|-----------|
|                                        | n       | % (N = 8) |
| No                                     | 6       | 75%       |
| Other external lab                     | 1       | 12%       |
| Yes                                    | 1       | 12%       |
| NA.                                    | 3       | -         |

## NGS: Performed by pathology lab - KIT

| NGS: Performed by pathology lab - KIT | Overall |           |
|---------------------------------------|---------|-----------|
|                                       | n       | % (N = 8) |
| No                                    | 6       | 75%       |
| Other external lab                    | 1       | 12%       |
| Yes                                   | 1       | 12%       |
| NA.                                   | 3       | -         |

## NGS: Moved to GLH / Genomic Centre - BRAF

| NGS: Moved to GLH / Genomic Centre - BRAF | Overall |           |
|-------------------------------------------|---------|-----------|
|                                           | n       | % (N = 7) |
| No                                        | 2       | 29%       |
| Yes                                       | 5       | 71%       |
| NA.                                       | 4       | -         |

## NGS: Moved to GLH / Genomic Centre - NRAS

| NGS: Moved to GLH / Genomic Centre - NRAS | Overall |           |
|-------------------------------------------|---------|-----------|
|                                           | n       | % (N = 8) |
| No                                        | 3       | 38%       |
| Yes                                       | 5       | 62%       |
| NA.                                       | 3       | -         |

## NGS: Moved to GLH / Genomic Centre - KIT

| NGS: Moved to GLH / Genomic Centre - KIT | Overall |           |
|------------------------------------------|---------|-----------|
|                                          | n       | % (N = 8) |
| No                                       | 3       | 38%       |
| Yes                                      | 5       | 62%       |
| NA.                                      | 3       | -         |

## NGS: Moving to GLH / Genomic hubs - BRAF

| NGS: Moving to GLH / Genomic hubs - BRAF | Overall |           |
|------------------------------------------|---------|-----------|
|                                          | n       | % (N = 7) |
| No                                       | 6       | 86%       |
| Yes                                      | 1       | 14%       |
| NA.                                      | 4       | -         |

## NGS: Moving to GLH / Genomic hubs - NRAS

| NGS: Moving to GLH / Genomic hubs - NRAS | Overall |           |
|------------------------------------------|---------|-----------|
|                                          | n       | % (N = 8) |
| No                                       | 7       | 88%       |
| Yes                                      | 1       | 12%       |
| NA.                                      | 3       | -         |

## NGS: Moving to GLH / Genomic hubs - KIT

| NGS: Moving to GLH / Genomic hubs - KIT | Overall |           |
|-----------------------------------------|---------|-----------|
|                                         | n       | % (N = 8) |
| No                                      | 7       | 88%       |
| Yes                                     | 1       | 12%       |
| NA.                                     | 3       | -         |

## NGS: Current average turnaround time - BRAF

| NGS: Current average turnaround time - BRAF | Overall      |
|---------------------------------------------|--------------|
|                                             | N = 11       |
| Mean                                        | 23.2         |
| SD                                          | 11.1         |
| Median                                      | 21.5         |
| IQR                                         | 15.8 to 26.2 |
| Range                                       | 12 to 45     |
| NA.                                         | 4            |

## NGS: Current average turnaround time - NRAS

| NGS: Current average turnaround time - NRAS | Overall |
|---------------------------------------------|---------|
|                                             | N = 11  |
| Mean                                        | 23.2    |

|        |              |
|--------|--------------|
| SD     | 11.1         |
| Median | 21.5         |
| IQR    | 15.8 to 26.2 |
| Range  | 12 to 45     |
| NA.    | 4            |

## NGS: Current average turnaround time - KIT

|                                            |              |
|--------------------------------------------|--------------|
| NGS: Current average turnaround time - KIT | Overall      |
|                                            | N = 11       |
| Mean                                       | 23.2         |
| SD                                         | 11.1         |
| Median                                     | 21.5         |
| IQR                                        | 15.8 to 26.2 |
| Range                                      | 12 to 45     |
| NA.                                        | 4            |

## Others

|                    |         |            |
|--------------------|---------|------------|
| Others             | Overall |            |
|                    | n       | % (N = 11) |
| BRAF FISH          | 1       | 9%         |
| KIT pyrosequencing | 1       | 9%         |
| N/A                | 8       | 73%        |
| NTRK1-3            | 1       | 9%         |
| NA.                | 0       | -          |

## Reflex at diagnosis - NTRK1-3

|                               |         |            |
|-------------------------------|---------|------------|
| Reflex at diagnosis - NTRK1-3 | Overall |            |
|                               | n       | % (N = 11) |
| N/A                           | 10      | 91%        |
| On request                    | 1       | 9%         |
| NA.                           | 0       | -          |

## Testing at progression/ relapse/ other post Dx timepoints

## - NTRK1-3

|                                                                        |         |            |
|------------------------------------------------------------------------|---------|------------|
| Testing at progression/ relapse/ other post Dx timepoints<br>- NTRK1-3 | Overall |            |
|                                                                        | n       | % (N = 11) |
| N/A                                                                    | 10      | 91%        |
| On request                                                             | 1       | 9%         |
| NA.                                                                    | 0       | -          |

## Performed by pathology lab - NTRK1-3

| Performed by pathology lab - NTRK1-3 | Overall |            |
|--------------------------------------|---------|------------|
|                                      | n       | % (N = 11) |
| N/A                                  | 10      | 91%        |
| No                                   | 1       | 9%         |
| NA.                                  | 0       | -          |

## Moved to GLH/ Genomic centre - NTRK1-3

| Moved to GLH/ Genomic centre - NTRK1-3 | Overall |            |
|----------------------------------------|---------|------------|
|                                        | n       | % (N = 11) |
| N/A                                    | 10      | 91%        |
| Yes                                    | 1       | 9%         |
| NA.                                    | 0       | -          |

## Moving to GLH/ Genomic hubs - NTRK1-3

| Moving to GLH/ Genomic hubs - NTRK1-3 | Overall |            |
|---------------------------------------|---------|------------|
|                                       | n       | % (N = 11) |
| N/A                                   | 10      | 91%        |
| No                                    | 1       | 9%         |
| NA.                                   | 0       | -          |

Current Average Turnaround time (calendar days) -  
NTRK1-3

| Current Average Turnaround time (calendar days) -<br>NTRK1-3 | Overall |            |
|--------------------------------------------------------------|---------|------------|
|                                                              | n       | % (N = 11) |
| 21 to 28                                                     | 1       | 9%         |
| N/A                                                          | 10      | 91%        |
| NA.                                                          | 0       | -          |

## Reflex at diagnosis - KIT pyrosequencing

| Reflex at diagnosis - KIT pyrosequencing | Overall |            |
|------------------------------------------|---------|------------|
|                                          | n       | % (N = 11) |
| N/A                                      | 10      | 91%        |

|     |   |    |
|-----|---|----|
| No  | 1 | 9% |
| NA. | 0 | -  |

Testing at progression/ relapse/ other post Dx timepoints  
- KIT pyrosequencing

| Testing at progression/ relapse/ other post Dx timepoints<br>- KIT pyrosequencing | Overall |            |
|-----------------------------------------------------------------------------------|---------|------------|
|                                                                                   | n       | % (N = 11) |
| N/A                                                                               | 10      | 91%        |
| No                                                                                | 1       | 9%         |
| NA.                                                                               | 0       | -          |

Performed by pathology lab - KIT pyrosequencing

| Performed by pathology lab - KIT pyrosequencing | Overall |            |
|-------------------------------------------------|---------|------------|
|                                                 | n       | % (N = 11) |
| N/A                                             | 10      | 91%        |
| Yes                                             | 1       | 9%         |
| NA.                                             | 0       | -          |

Moved to GLH/ Genomic centre - KIT pyrosequencing

| Moved to GLH/ Genomic centre - KIT pyrosequencing | Overall |            |
|---------------------------------------------------|---------|------------|
|                                                   | n       | % (N = 11) |
| N/A                                               | 10      | 91%        |
| No                                                | 1       | 9%         |
| NA.                                               | 0       | -          |

Moving to GLH/ Genomic hubs - KIT pyrosequencing

| Moving to GLH/ Genomic hubs - KIT pyrosequencing | Overall |            |
|--------------------------------------------------|---------|------------|
|                                                  | n       | % (N = 11) |
| N/A                                              | 10      | 91%        |
| No                                               | 1       | 9%         |
| NA.                                              | 0       | -          |

Current Average Turnaround time (calendar days) - KIT  
pyrosequencing

| Current Average Turnaround time (calendar days) - KIT<br>pyrosequencing | Overall |            |
|-------------------------------------------------------------------------|---------|------------|
|                                                                         | n       | % (N = 10) |
| N/A                                                                     | 10      | 100%       |
| NA.                                                                     | 1       | -          |

Reflex at diagnosis - BRAF FISH

| Reflex at diagnosis - BRAF FISH | Overall |            |
|---------------------------------|---------|------------|
|                                 | n       | % (N = 11) |
| N/A                             | 10      | 91%        |
| Yes                             | 1       | 9%         |
| NA.                             | 0       | -          |

Testing at progression/ relapse/ other post Dx timepoints  
- BRAF FISH

| Testing at progression/ relapse/ other post Dx timepoints<br>- BRAF FISH | Overall |            |
|--------------------------------------------------------------------------|---------|------------|
|                                                                          | n       | % (N = 11) |
| N/A                                                                      | 10      | 91%        |
| No                                                                       | 1       | 9%         |
| NA.                                                                      | 0       | -          |

Performed by pathology lab - BRAF FISH

| Performed by pathology lab - BRAF FISH | Overall |            |
|----------------------------------------|---------|------------|
|                                        | n       | % (N = 11) |
| N/A                                    | 10      | 91%        |
| Other lab                              | 1       | 9%         |
| NA.                                    | 0       | -          |

Moved to GLH/ Genomic centre - BRAF FISH

| Moved to GLH/ Genomic centre - BRAF FISH | Overall |            |
|------------------------------------------|---------|------------|
|                                          | n       | % (N = 11) |
| N/A                                      | 10      | 91%        |
| No                                       | 1       | 9%         |

|     |   |   |
|-----|---|---|
| NA. | 0 | - |
|-----|---|---|

## Moving to GLH/ Genomic hubs - BRAF FISH

| Moving to GLH/ Genomic hubs - BRAF FISH | Overall |            |
|-----------------------------------------|---------|------------|
|                                         | n       | % (N = 11) |
| N/A                                     | 10      | 91%        |
| No                                      | 1       | 9%         |
| NA.                                     | 0       | -          |

## Current Average Turnaround time (calendar days) - BRAF FISH

| Current Average Turnaround time (calendar days) - BRAF FISH | Overall |            |
|-------------------------------------------------------------|---------|------------|
|                                                             | n       | % (N = 11) |
| N/A                                                         | 10      | 91%        |
| Not known                                                   | 1       | 9%         |
| NA.                                                         | 0       | -          |

## Numerical Data

## Grouped data - if applicable

## 11.a.i. Breast cancer: HR

| 11.a.i. Breast cancer: HR |   | Overall   |  |
|---------------------------|---|-----------|--|
|                           | n | % (N = 9) |  |
| No                        | 4 | 44%       |  |
| Yes                       | 5 | 56%       |  |
| NA.                       | 0 | -         |  |

## 11.a.i. Breast cancer: PGR

| 11.a.i. Breast cancer: PGR |   | Overall   |  |
|----------------------------|---|-----------|--|
|                            | n | % (N = 9) |  |
| No                         | 3 | 33%       |  |
| Yes                        | 6 | 67%       |  |
| NA.                        | 0 | -         |  |

## 11.a.i. Breast cancer: HER2

| 11.a.i. Breast cancer: HER2 |   | Overall   |  |
|-----------------------------|---|-----------|--|
|                             | n | % (N = 9) |  |
| No                          | 3 | 33%       |  |
| Yes                         | 6 | 67%       |  |
| NA.                         | 0 | -         |  |

## 11.a.i. Other

| 11.a.i. Other                         |   | Overall   |  |
|---------------------------------------|---|-----------|--|
|                                       | n | % (N = 9) |  |
| N/A                                   | 8 | 89%       |  |
| PDL1 for Triple neagive BC on request | 1 | 11%       |  |
| NA.                                   | 0 | -         |  |

## 11.a.i. NA

| 11.a.i. NA |   | Overall   |  |
|------------|---|-----------|--|
|            | n | % (N = 9) |  |
| No         | 6 | 67%       |  |
| Yes        | 3 | 33%       |  |
| NA.        | 0 | -         |  |

## 11.a.ii. Lung Cancer: PD-L1

| 11.a.ii. Lung Cancer: PD-L1 |    | Overall    |  |
|-----------------------------|----|------------|--|
|                             | n  | % (N = 15) |  |
| No                          | 2  | 13%        |  |
| Yes                         | 13 | 87%        |  |
| NA.                         | 0  | -          |  |

## 11.a.ii. Lung Cancer: EGFR

| 11.a.ii. Lung Cancer: EGFR |    | Overall    |  |
|----------------------------|----|------------|--|
|                            | n  | % (N = 15) |  |
| No                         | 2  | 13%        |  |
| Yes                        | 13 | 87%        |  |
| NA.                        | 0  | -          |  |

## 11.a.ii. Lung Cancer: ALK

| 11.a.ii. Lung Cancer: ALK |    | Overall    |  |
|---------------------------|----|------------|--|
|                           | n  | % (N = 15) |  |
| No                        | 2  | 13%        |  |
| Yes                       | 13 | 87%        |  |
| NA.                       | 0  | -          |  |

## 11.a.ii. Lung Cancer: BRAF

| 11.a.ii. Lung Cancer: BRAF |   | Overall    |  |
|----------------------------|---|------------|--|
|                            | n | % (N = 15) |  |
| No                         | 7 | 47%        |  |
| Yes                        | 8 | 53%        |  |
| NA.                        | 0 | -          |  |

## 11.a.ii. Lung Cancer: ROS1

| 11.a.ii. Lung Cancer: ROS1 |    | Overall    |  |
|----------------------------|----|------------|--|
|                            | n  | % (N = 15) |  |
| No                         | 3  | 20%        |  |
| Yes                        | 12 | 80%        |  |
| NA.                        | 0  | -          |  |

## 11.a.ii. Lung Cancer: RET

| 11.a.ii. Lung Cancer: RET |   | Overall    |  |
|---------------------------|---|------------|--|
|                           | n | % (N = 15) |  |
| No                        | 9 | 60%        |  |
| Yes                       | 6 | 40%        |  |
| NA.                       | 0 | -          |  |

## 11a.ii Other

| 11a.ii Other |   | Overall    |  |
|--------------|---|------------|--|
|              | n | % (N = 15) |  |
| KRAS         | 2 | 13%        |  |



|            |    |     |
|------------|----|-----|
| KRAS, NTRK | 1  | 7%  |
| N/A        | 11 | 73% |
| T790M      | 1  | 7%  |
| NA.        | 0  | -   |

## 11.a.ii. NA

| 11.a.ii. NA | Overall |            |
|-------------|---------|------------|
|             | n       | % (N = 15) |
| No          | 13      | 87%        |
| Yes         | 2       | 13%        |
| NA.         | 0       | -          |

## 11.a.iii Melanoma: BRAF

| 11.a.iii Melanoma: BRAF | Overall |            |
|-------------------------|---------|------------|
|                         | n       | % (N = 11) |
| No                      | 1       | 9%         |
| Yes                     | 10      | 91%        |
| NA.                     | 0       | -          |

## 11.a.iii Other

| 11.a.iii Other | Overall |            |
|----------------|---------|------------|
|                | n       | % (N = 11) |
| N/A            | 11      | 100%       |
| NA.            | 0       | -          |

## 11.a.iii NA

| 11.a.iii NA | Overall |            |
|-------------|---------|------------|
|             | n       | % (N = 11) |
| No          | 10      | 91%        |
| Yes         | 1       | 9%         |
| NA.         | 0       | -          |

## 11.b.

| 11.b. | Overall |            |
|-------|---------|------------|
|       | n       | % (N = 15) |
| No    | 7       | 47%        |
| Yes   | 8       | 53%        |
| NA.   | 0       | -          |

## 11.b. Specify

| 11.b. Specify                                 | Overall |           |
|-----------------------------------------------|---------|-----------|
|                                               | n       | % (N = 7) |
| Mix, Pathology lab + GLH                      | 4       | 57%       |
| Mix, Pathology lab + GLH + Other external lab | 1       | 14%       |
| Mix, Pathology lab + Other external lab       | 1       | 14%       |
| Other external lab                            | 1       | 14%       |
| NA.                                           | 8       | -         |

## 11.c.

| 11.c.                                                     | Overall |            |
|-----------------------------------------------------------|---------|------------|
|                                                           | n       | % (N = 15) |
| Both depending on target + NGS locally would be preferred | 1       | 7%         |
| Both IHC and RT-PCR depending on target                   | 9       | 60%        |
| IHC                                                       | 2       | 13%        |
| IHC + NGS                                                 | 1       | 7%         |
| IHC + Other not specified                                 | 1       | 7%         |
| RT-PCR                                                    | 1       | 7%         |
| NA.                                                       | 0       | -          |

## 11.d.

| 11.d.           | Overall |            |
|-----------------|---------|------------|
|                 | n       | % (N = 15) |
| GLH             | 2       | 13%        |
| N/A             | 1       | 7%         |
| NHS Trust       | 9       | 60%        |
| NHS Trust + GLH | 3       | 20%        |
| NA.             | 0       | -          |

## 11.e

| 11.e | Overall |            |
|------|---------|------------|
|      | n       | % (N = 15) |
| N/A  | 2       | 13%        |
| No   | 3       | 20%        |
| Yes  | 10      | 67%        |
| NA.  | 0       | -          |

## 12. Breast

| 12. Breast | Overall    |
|------------|------------|
|            | N = 15     |
| Mean       | 85         |
| SD         | 36.7       |
| Median     | 100        |
| IQR        | 100 to 100 |
| Range      | 10 to 100  |
| NA.        | 9          |

## 12. Melanoma

| 12. Melanoma | Overall  |
|--------------|----------|
|              | N = 15   |
| Mean         | 37.2     |
| SD           | 38.1     |
| Median       | 20       |
| IQR          | 5 to 80  |
| Range        | 5 to 100 |
| NA.          | 6        |

12. Lung

| 12. Lung | Overall   |
|----------|-----------|
|          | N = 15    |
| Mean     | 69.1      |
| SD       | 33.4      |
| Median   | 75        |
| IQR      | 50 to 100 |
| Range    | 5 to 100  |
| NA.      | 1         |

13.a. Please describe the process for request of archival tissue:

| 13.a. Please describe the process for request of archival tissue:                                                     | Overall |            |
|-----------------------------------------------------------------------------------------------------------------------|---------|------------|
|                                                                                                                       | n       | % (N = 15) |
| Complete request form, retrieval from off-site storage for older tissues (over 2 years). Onsite if more recent        | 1       | 7%         |
| Need to request samples (book in/out)                                                                                 | 1       | 7%         |
| Online request for retrieval (storage site not specified)                                                             | 1       | 7%         |
| Request from pathology team storage site not specified                                                                | 1       | 7%         |
| Request to audit team, retrieval from offsite storage                                                                 | 1       | 7%         |
| Request to pathology team, selection and request of the block, can be onsite or offsite (older samples)               | 1       | 7%         |
| Requested from archival team, Retrieval from off-site storage for older tissues (over 4 years). Onsite if more recent | 1       | 7%         |
| Requested, Retrieval from onsite or offsite, often tissue blocks                                                      | 1       | 7%         |
| Requested, Retrieval from onsite storage                                                                              | 1       | 7%         |
| Retrieval from off-site storage for older tissues, Onsite if more recent                                              | 1       | 7%         |
| Retrieval from onsite storage                                                                                         | 1       | 7%         |
| Selection and request of tissue, Retrieval from off-site storage                                                      | 1       | 7%         |
| System based request, retrieval from off-site storage for older tissues (over 5 years). Onsite if more recent         | 1       | 7%         |
| Up to 2 years request from onsite, after 2 years, Request from offsite storage.                                       | 1       | 7%         |
| Up to 2 years Request from onsite, after 2 years, request from offsite storage.                                       | 1       | 7%         |
| NA.                                                                                                                   | 0       | -          |

13.a. Please describe the process for request of archival tissue:

| 13.a. Please describe the process for request of archival tissue: | Overall |            |
|-------------------------------------------------------------------|---------|------------|
|                                                                   | n       | % (N = 15) |
| <b>Request</b>                                                    | /       | /          |
| Form                                                              | 1       | 7%         |
| Online                                                            | 1       | 7%         |
| System based                                                      | 1       | 7%         |
| To archival team                                                  | 1       | 7%         |
| To pathology team                                                 | 2       | 13%        |
| To audit team                                                     | 1       | 7%         |
| Not specified                                                     | 8       | 53%        |
| <b>Retrieval</b>                                                  | /       | /          |
| From onsite storage (only)                                        | 2       | 13%        |
| From offsite storage (only)                                       | 2       | 13%        |
| Onsite (recent) - Offsite (after 2 years)                         | 3       | 20%        |
| Onsite (recent) - Offsite (after 4 years)                         | 1       | 7%         |
| Onsite (recent) - Offsite (after 5 years)                         | 1       | 7%         |
| Onsite (recent) - Offsite (older - unspecified)                   | 3       | 20%        |
| Not specified                                                     | 3       | 20%        |
| NA.                                                               | 0       | -          |

\* Request and Retrieval not mutually exclusive (but respectively mutually exclusive within)

13.b. Describe the specific challenges with archival tissue that may exist for Lung, Breast or Melanoma?

| 13.b. Describe the specific challenges with archival tissue that may exist for Lung, Breast or Melanoma? | Overall |            |
|----------------------------------------------------------------------------------------------------------|---------|------------|
|                                                                                                          | n       | % (N = 15) |
| Additional administration, Unpredictable sample quality, Frequent failure of lung cancer tissue          | 1       | 7%         |
| Difficulties with sample retrieval, Hard to access or lost samples                                       | 1       | 7%         |
| DNA degradation, Overfixed tissue                                                                        | 1       | 7%         |
| Loss of tissue sample, Sample quality for lung and melanoma                                              | 1       | 7%         |
| None                                                                                                     | 1       | 7%         |
| Sample quality for lung, Small sample size, Loss of tissue sample                                        | 1       | 7%         |
| Sample size with lung cancer                                                                             | 2       | 13%        |
| Small sample (for lung cancer)                                                                           | 1       | 7%         |
| Small sample (for lung cancer), Logistics issues with offsite storage                                    | 1       | 7%         |
| Small sample size                                                                                        | 1       | 7%         |
| Small sample size, Cost and resources                                                                    | 1       | 7%         |
| Small samples, insufficient sample available, TAT for retrieval of offsite stored samples, Cost          | 1       | 7%         |
| Time to retrieve from offsite                                                                            | 2       | 13%        |
| NA.                                                                                                      | 0       | -          |

| 13.b. Describe the specific challenges with archival tissue that may exist for Lung, Breast or Melanoma? | Overall |            |
|----------------------------------------------------------------------------------------------------------|---------|------------|
|                                                                                                          | n       | % (N = 15) |
| Technical (sample quality, sample quantity, failure rates)                                               | 11      |            |
| Logistics (additional admin, loss of sample, difficulty with retrieval, cost, turnaround time)           | 9       |            |
| None                                                                                                     | 1       |            |

13.c.i. Breast

| 13.c.i. Breast | Overall    |
|----------------|------------|
|                | N = 15     |
| Mean           | 5.2        |
| SD             | 6.7        |
| Median         | 2.2        |
| IQR            | 1.1 to 6.5 |
| Range          | 0 to 17.5  |
| NA.            | 7          |

13.c.ii. Lung

| 13.c.ii. Lung | Overall    |
|---------------|------------|
|               | N = 15     |
| Mean          | 2.5        |
| SD            | 3.4        |
| Median        | 1.5        |
| IQR           | 1.2 to 2.5 |
| Range         | 0 to 14    |
| NA.           | 0          |

13.c.iii. Melanoma

| 13.c.iii. Melanoma | Overall |
|--------------------|---------|
|                    | N = 15  |
| Mean               | 4.5     |

|        |            |
|--------|------------|
| SD     | 5.8        |
| Median | 2          |
| IQR    | 1.5 to 4.2 |
| Range  | 0 to 17.5  |
| NA.    | 4          |

## 13.d. Sample quality

| 13.d. Sample quality | Overall |            |
|----------------------|---------|------------|
|                      | n       | % (N = 15) |
| No                   | 8       | 53%        |
| Yes                  | 7       | 47%        |
| NA.                  | 0       | -          |

## 13.d. Additional resource requirements

| 13.d. Additional resource requirements | Overall |            |
|----------------------------------------|---------|------------|
|                                        | n       | % (N = 15) |
| No                                     | 9       | 60%        |
| Yes                                    | 6       | 40%        |
| NA.                                    | 0       | -          |

## 13.d. Processing issues

| 13.d. Processing issues | Overall |            |
|-------------------------|---------|------------|
|                         | n       | % (N = 15) |
| No                      | 14      | 93%        |
| Yes                     | 1       | 7%         |
| NA.                     | 0       | -          |

## 13.d. Transport

| 13.d. Transport | Overall |            |
|-----------------|---------|------------|
|                 | n       | % (N = 15) |
| No              | 11      | 73%        |
| Yes             | 4       | 27%        |
| NA.             | 0       | -          |

## 13.d. Other What are the challenges with archival tissue for genomics at GLH?

| 13.d. Other What are the challenges with archival tissue for genomics at GLH? | Overall |           |
|-------------------------------------------------------------------------------|---------|-----------|
|                                                                               | n       | % (N = 5) |
| Administration burden                                                         | 2       | 40%       |
| Retrieval                                                                     | 1       | 20%       |
| Small sample size                                                             | 2       | 40%       |
| NA.                                                                           | 10      | -         |

14.a. Do you currently offer molecular testing of liquid biopsies at your lab?  
EGFR only  No 

| 14.a.                                                                   | Overall |            |
|-------------------------------------------------------------------------|---------|------------|
|                                                                         | n       | % (N = 15) |
| EGFR only                                                               | 2       | 13%        |
| EGFR, BRAF, RET, MET                                                    | 1       | 7%         |
| EGFR, KIT, BRAF, KRAS, RAS - VERY FEW REQUESTS. NGS VALIDATED BY PLASMA | 1       | 7%         |
| No                                                                      | 11      | 73%        |
| NA.                                                                     | 0       | -          |

14.b. Are there any other molecular liquid biopsies performed at your lab? If so, which one(s) and for which cancer types?  
No   
Yes  \_\_\_\_\_

| 14.b.                                                                   | Overall |            |
|-------------------------------------------------------------------------|---------|------------|
|                                                                         | n       | % (N = 15) |
| EGFR only                                                               | 2       | 13%        |
| EGFR, BRAF, RET, MET                                                    | 1       | 7%         |
| EGFR, KIT, BRAF, KRAS, RAS - VERY FEW REQUESTS. NGS VALIDATED BY PLASMA | 1       | 7%         |
| No                                                                      | 11      | 73%        |
| NA.                                                                     | 0       | -          |

## 14.c. What do you foresee will be the use of liquid biopsy within the diagnostic pathway?

## 14.c. For all testing

| 14.c. For all testing | Overall |            |
|-----------------------|---------|------------|
|                       | n       | % (N = 15) |
| No                    | 14      | 93%        |
| Yes                   | 1       | 7%         |
| NA.                   | 0       | -          |

## 14.c. In addition to tissue testing (same targets)

| 14.c. In addition to tissue testing (same targets) | Overall |            |
|----------------------------------------------------|---------|------------|
|                                                    | n       | % (N = 15) |
| No                                                 | 2       | 13%        |
| Yes                                                | 13      | 87%        |
| NA.                                                | 0       | -          |

## 14.c. If a suitable tissue sample is not available

| 14.c. If a suitable tissue sample is not available | Overall |            |
|----------------------------------------------------|---------|------------|
|                                                    | n       | % (N = 15) |
| No                                                 | 6       | 40%        |
| Yes                                                | 9       | 60%        |
| NA.                                                | 0       | -          |

## 14.c. Upon progression only

| 14.c. Upon progression only | Overall |            |
|-----------------------------|---------|------------|
|                             | n       | % (N = 15) |
| No                          | 12      | 80%        |
| Yes                         | 3       | 20%        |
| NA.                         | 0       | -          |

## 14.c. For specific tests only i.e.

| 14.c. For specific tests only i.e. | Overall |            |
|------------------------------------|---------|------------|
|                                    | n       | % (N = 15) |
| Yes (not specified)                | 1       | 7%         |
| As clinically relevant             | 2       | 13%        |
| No                                 | 12      | 80%        |
| NA.                                | 0       | -          |

## 14.c. For panel testing

| 14.c. For panel testing | Overall |            |
|-------------------------|---------|------------|
|                         | n       | % (N = 15) |
| No                      | 7       | 47%        |
| Yes                     | 8       | 53%        |
| NA.                     | 0       | -          |

## 14.c. Not used

| 14.c. Not used | Overall |            |
|----------------|---------|------------|
|                | n       | % (N = 15) |
| No             | 15      | 100%       |
| NA.            | 0       | -          |

## 14.d. What are the challenges with liquid biopsies?

| 14.d. What are the challenges with liquid biopsies?                              | Overall |            |
|----------------------------------------------------------------------------------|---------|------------|
|                                                                                  | n       | % (N = 14) |
| Administrative burden, Pathway integration                                       | 1       | 7%         |
| Report preparation, Pathway integration                                          | 1       | 7%         |
| Sensitivity and Specificity                                                      | 1       | 7%         |
| Sensitivity, Funding                                                             | 1       | 7%         |
| Sensitivity, Limited range of testing methods                                    | 2       | 14%        |
| Sensitivity, Pathway integration                                                 | 1       | 7%         |
| Sensitivity, Sample preparation, Interpretation of results                       | 1       | 7%         |
| Sensitivity, Variable levels of ctDNA in blood                                   | 3       | 21%        |
| Sensitivity, Variable levels of ctDNA in blood, Interpretation of results        | 1       | 7%         |
| Sensitivity, Variable levels of ctDNA in blood, Limited range of testing methods | 1       | 7%         |
| Technology, Validation, Interpretation of results (eg MRD)                       | 1       | 7%         |
| NA.                                                                              | 1       | -          |

| 14.d. What are the challenges with liquid biopsies?                                                         | Overall |            |
|-------------------------------------------------------------------------------------------------------------|---------|------------|
|                                                                                                             | n       | % (N = 14) |
| Technical issues (Poor sensitivity, variable levels of ctDNA in sample, limited technology/testing options) | 12      |            |
| Logistical issues (additional admin, pathway integration, funding, results interpretation)                  | 7       |            |
| NA                                                                                                          | 1       |            |

## 15. Are you currently developing any other molecular tests for Lung, Breast or Melanoma?

| 15. Are you currently developing any other molecular tests for Lung, Breast or Melanoma? | Overall |            |
|------------------------------------------------------------------------------------------|---------|------------|
|                                                                                          | n       | % (N = 15) |
| Acquiring Genexus platform                                                               | 2       | 13%        |
| Acquiring Genexus platform, NGS for Lung Cancer genomics, IHC for BRAF in melanoma       | 1       | 7%         |
| Acquiring Genexus platform, NGS locally for urgent Lung cancer, FISH                     | 1       | 7%         |
| BAP 1 - Immuno stain for Meso and melanomas                                              | 1       | 7%         |
| IHC for BRAF in melanoma                                                                 | 1       | 7%         |
| NGS locally                                                                              | 2       | 13%        |
| No                                                                                       | 7       | 47%        |
| NA.                                                                                      | 0       | -          |

| 15. Are you currently developing any other molecular tests for Lung, Breast or Melanoma? | Overall |            |
|------------------------------------------------------------------------------------------|---------|------------|
|                                                                                          | n       | % (N = 15) |
| IHC                                                                                      | 3       |            |
| NGS technologies                                                                         | 6       |            |
| Other                                                                                    | 1       |            |
| None                                                                                     | 7       |            |

## 16. Timelines for implementation

| 16. Timelines for implementation | Overall |            |
|----------------------------------|---------|------------|
|                                  | n       | % (N = 15) |
| No                               | 7       | 47%        |
| Yes                              | 8       | 53%        |
| NA.                              | 0       | -          |

## 16. Test development

| 16. Test development | Overall |            |
|----------------------|---------|------------|
|                      | n       | % (N = 15) |
| No                   | 11      | 73%        |
| Yes                  | 4       | 27%        |
| NA.                  | 0       | -          |

## 16. Test validation

| 16. Test validation | Overall |            |
|---------------------|---------|------------|
|                     | n       | % (N = 15) |
| No                  | 3       | 20%        |
| Yes                 | 12      | 80%        |
| NA.                 | 0       | -          |

## 16. Administration

| 16. Administration | Overall |            |
|--------------------|---------|------------|
|                    | n       | % (N = 15) |
| No                 | 6       | 40%        |
| Yes                | 9       | 60%        |
| NA.                | 0       | -          |

## 16. Funding / Resource allocation

| 16. Funding / Resource allocation |    | Overall    |  |
|-----------------------------------|----|------------|--|
|                                   | n  | % (N = 15) |  |
| No                                | 2  | 13%        |  |
| Yes                               | 13 | 87%        |  |
| NA.                               | 0  | -          |  |

## 16. Communication

| 16. Communication |    | Overall    |  |
|-------------------|----|------------|--|
|                   | n  | % (N = 15) |  |
| No                | 11 | 73%        |  |
| Yes               | 4  | 27%        |  |
| NA.               | 0  | -          |  |

## 17. Respiratory physicians / Pulmonologists

| 17. Respiratory physicians / Pulmonologists |    | Overall    |  |
|---------------------------------------------|----|------------|--|
|                                             | n  | % (N = 15) |  |
| No                                          | 4  | 27%        |  |
| Yes                                         | 11 | 73%        |  |
| NA.                                         | 0  | -          |  |

## 17. Surgeon

| 17. Surgeon |    | Overall    |  |
|-------------|----|------------|--|
|             | n  | % (N = 15) |  |
| No          | 3  | 20%        |  |
| Yes         | 12 | 80%        |  |
| NA.         | 0  | -          |  |

## 17. Oncologist

| 17. Oncologist |    | Overall    |  |
|----------------|----|------------|--|
|                | n  | % (N = 15) |  |
| Yes            | 15 | 100%       |  |
| NA.            | 0  | -          |  |

## 17. MDT Coordinator

| 17. MDT Coordinator |   | Overall    |  |
|---------------------|---|------------|--|
|                     | n | % (N = 15) |  |
| No                  | 6 | 40%        |  |
| Yes                 | 9 | 60%        |  |
| NA.                 | 0 | -          |  |

## 17. Clinical nurse specialist

| 17. Clinical nurse specialist |    | Overall    |  |
|-------------------------------|----|------------|--|
|                               | n  | % (N = 15) |  |
| No                            | 4  | 27%        |  |
| Yes                           | 11 | 73%        |  |
| NA.                           | 0  | -          |  |

## 17. Other

| 17. Other      |    | Overall   |  |
|----------------|----|-----------|--|
|                | n  | % (N = 5) |  |
| Dermatologists | 3  | 60%       |  |
| Pathologists   | 1  | 20%       |  |
| Radiologists   | 1  | 20%       |  |
| NA.            | 10 | -         |  |

## 18. Do you regularly attend MDT?

| 18. Do you regularly attend MDT? |    | Overall    |  |
|----------------------------------|----|------------|--|
|                                  | n  | % (N = 15) |  |
| No                               | 1  | 7%         |  |
| Yes                              | 14 | 93%        |  |
| NA.                              | 0  | -          |  |

## 19. Do you discuss results at standard MDTs?

| 19. Do you discuss results at standard MDTs? |    | Overall    |  |
|----------------------------------------------|----|------------|--|
|                                              | n  | % (N = 15) |  |
| Yes                                          | 15 | 100%       |  |
| NA.                                          | 0  | -          |  |

## 20. Do you have a molecular specific MDTs?

| 20. Do you have a molecular specific MDTs? |    | Overall    |  |
|--------------------------------------------|----|------------|--|
|                                            | n  | % (N = 15) |  |
| No                                         | 12 | 80%        |  |
| Yes                                        | 3  | 20%        |  |
| NA.                                        | 0  | -          |  |

## 21. Respiratory physicians / Pulmonologists

| 21. Respiratory physicians / Pulmonologists |    | Overall    |  |
|---------------------------------------------|----|------------|--|
|                                             | n  | % (N = 15) |  |
| No                                          | 10 | 67%        |  |

|     |   |     |
|-----|---|-----|
| Yes | 5 | 33% |
| NA. | 0 | -   |

## 21. Surgeon

| 21. Surgeon | Overall |            |
|-------------|---------|------------|
|             | n       | % (N = 15) |
| No          | 11      | 73%        |
| Yes         | 4       | 27%        |
| NA.         | 0       | -          |

## 21. Administrator

| 21. Administrator | Overall |            |
|-------------------|---------|------------|
|                   | n       | % (N = 15) |
| No                | 12      | 80%        |
| Yes               | 3       | 20%        |
| NA.               | 0       | -          |

## 21. Pathologists

| 21. Pathologists | Overall |            |
|------------------|---------|------------|
|                  | n       | % (N = 15) |
| Yes              | 15      | 100%       |
| NA.              | 0       | -          |

## 21. Clinical scientist (genomics)

| 21. Clinical scientist (genomics) | Overall |            |
|-----------------------------------|---------|------------|
|                                   | n       | % (N = 15) |
| No                                | 12      | 80%        |
| Yes                               | 3       | 20%        |
| NA.                               | 0       | -          |

## 21. Oncologist

| 21. Oncologist | Overall |            |
|----------------|---------|------------|
|                | n       | % (N = 15) |
| No             | 5       | 33%        |
| Yes            | 10      | 67%        |
| NA.            | 0       | -          |

## 21. Other

| 21. Other          | Overall |           |
|--------------------|---------|-----------|
|                    | n       | % (N = 2) |
| CNS                | 1       | 50%       |
| CNS, Dermatologist | 1       | 50%       |
| NA.                | 13      | -         |

## 22. Email

| 22. Email | Overall |            |
|-----------|---------|------------|
|           | n       | % (N = 15) |
| No        | 1       | 7%         |
| Yes       | 14      | 93%        |
| NA.       | 0       | -          |

## 22. Webpage

| 22. Webpage | Overall |            |
|-------------|---------|------------|
|             | n       | % (N = 15) |
| No          | 13      | 87%        |
| Yes         | 2       | 13%        |
| NA.         | 0       | -          |

## 22. Hospital Newsletter

| 22. Hospital Newsletter | Overall |            |
|-------------------------|---------|------------|
|                         | n       | % (N = 15) |
| No                      | 14      | 93%        |
| Yes                     | 1       | 7%         |
| NA.                     | 0       | -          |

## 22. MDT meeting

| 22. MDT meeting | Overall |            |
|-----------------|---------|------------|
|                 | n       | % (N = 15) |
| No              | 3       | 20%        |
| Yes             | 12      | 80%        |
| NA.             | 0       | -          |

## 22. Other

| 22. Other                          | Overall |           |
|------------------------------------|---------|-----------|
|                                    | n       | % (N = 7) |
| Focus groups, Educational webinars | 1       | 14%       |
| Informal discussions               | 2       | 29%       |
| Informal discussions, Conferences  | 1       | 14%       |
| Informal discussions, Meetings     | 1       | 14%       |
| Phone                              | 2       | 29%       |
| NA.                                | 8       | -         |

23. No

| 23. No                                              | Overall |            |
|-----------------------------------------------------|---------|------------|
|                                                     | n       | % (N = 15) |
| No                                                  | 1       | 7%         |
| Reference to available targeted therapies only      | 2       | 13%        |
| Reference to published therapy area guidelines only | 3       | 20%        |
| Yes                                                 | 9       | 60%        |
| NA.                                                 | 0       | -          |

23. Other specify

| 23. Other specify                                                            | Overall |           |
|------------------------------------------------------------------------------|---------|-----------|
|                                                                              | n       | % (N = 6) |
| Cross-reference literature for less known alterations                        | 1       | 17%       |
| Drug classes only - no specified named treatments                            | 1       | 17%       |
| Drug classes only - no specified named treatments, Not for melanoma          | 1       | 17%       |
| Less for melanoma                                                            | 1       | 17%       |
| Notes on whether sentizing mutation or not (i.e. EGFR)                       | 1       | 17%       |
| Variant classification would be a good to include but not done at the moment | 1       | 17%       |
| NA.                                                                          | 9       | -         |

24. What impact has COVID-19 had on your current services?

| 24. What impact has COVID-19 had on your current services? | Overall |            |
|------------------------------------------------------------|---------|------------|
|                                                            | n       | % (N = 15) |
| High impact                                                | 6       | 40%        |
| Medium impact                                              | 5       | 33%        |
| Minimal or no impact                                       | 4       | 27%        |
| NA.                                                        | 0       | -          |

24. Please describe if medium or high impact

| 24. Please describe if medium or high impact                           | Overall |            |
|------------------------------------------------------------------------|---------|------------|
|                                                                        | n       | % (N = 12) |
| Backlog (Breast + Melanoma), Increased workload (Breast + Melanoma)    | 1       | 8%         |
| Backlog of patient presenting with later diagnosis                     | 1       | 8%         |
| Delays in getting specimens                                            | 1       | 8%         |
| Impact on referral services                                            | 1       | 8%         |
| Increase in workload                                                   | 1       | 8%         |
| Increase workload from backlog                                         | 1       | 8%         |
| Less staff, increase in workload                                       | 2       | 17%        |
| Less staff, increase in workload, Backlog, Reallocation of consumables | 1       | 8%         |
| Number of specimens decreased early on, Normal numbers now             | 1       | 8%         |
| Reduced capacity early pandemic, Backlog on current testing service    | 1       | 8%         |
| Slight increase in current workload particularly for urgent services   | 1       | 8%         |
| NA.                                                                    | 3       | -          |

| 24. Please describe if medium or high impact of COVID        | Overall |            |
|--------------------------------------------------------------|---------|------------|
|                                                              | n       | % (N = 12) |
| Staffing (reduced during COVID)                              | 4       |            |
| Workloads (lower presentation, delays in referral, backlogs) | 12      |            |
| Other                                                        | 1       |            |
| NA                                                           | 3       |            |

25. What impact has the roll out of the GMS and GLH had on your current services (positiveand/or negative)?

| 25. What impact has the roll out of the GMS and GLH had on your current services (positivand/or negative)? | Overall |            |
|------------------------------------------------------------------------------------------------------------|---------|------------|
|                                                                                                            | n       | % (N = 15) |
| High impact                                                                                                | 8       | 53%        |
| Medium impact                                                                                              | 4       | 27%        |
| Minimal or no impact                                                                                       | 1       | 7%         |
| N/A                                                                                                        | 2       | 13%        |
| NA.                                                                                                        | 0       | -          |

25. Please describe

| 25. Please describe                                                                                                                                                                                                              | Overall |            |
|----------------------------------------------------------------------------------------------------------------------------------------------------------------------------------------------------------------------------------|---------|------------|
|                                                                                                                                                                                                                                  | n       | % (N = 15) |
| N/A                                                                                                                                                                                                                              | 1       | 7%         |
| Negative - Cost, Funding issues / Positive - GLH improved TAT (due to salvage pathway using Genexus), more GLH usage leading to less wait for batching                                                                           | 1       | 7%         |
| Negative - Extra workload                                                                                                                                                                                                        | 1       | 7%         |
| Negative - GLH not running, No local funding, Incomplete testing, Poor TAT, pathway not streamlined, Roles unclear, Higher staff turnover, increased resource requirements                                                       | 1       | 7%         |
| Negative - Increased administrative burden, Increase resource, Poor compatibility of IT system                                                                                                                                   | 1       | 7%         |
| Negative - Loss of local genomic lab, Service moving further from patient, Pathway not streamlined                                                                                                                               | 1       | 7%         |
| Negative - No pathology input into new service                                                                                                                                                                                   | 1       | 7%         |
| Negative - Poor TAT, Higher sample quality requirements for NGS, High failure rate, Poor compatibility of IT system                                                                                                              | 1       | 7%         |
| Negative - Poor TAT, Inefficient results reporting, Hinderance of local research projects                                                                                                                                        | 1       | 7%         |
| Negative - Poor TAT, Logistical burden / Positive - Improved failure rate                                                                                                                                                        | 1       | 7%         |
| Negative - Service moving further from patient, Pathway not streamlined, Funding, Lack of pathology acknowledgement, Lack of collaboration                                                                                       | 1       | 7%         |
| Negative - TAT, Sample quantity requirement is higher, Pathway not streamlined, Inefficient results reporting (too complicated)                                                                                                  | 1       | 7%         |
| Positive - Funding, Efficient test delivery, Higher sequence coverage                                                                                                                                                            | 1       | 7%         |
| Positive - Lung streamlined pathway (reflex), Good communication / Negative - Melanoma + Breast not streamlined, Poor TAT, Higher tissue quality requirements, Administrative burden, Lack of collaboration, Poor IT integration | 1       | 7%         |
| Positive - No extra workload                                                                                                                                                                                                     | 1       | 7%         |
| NA.                                                                                                                                                                                                                              | 0       | -          |

| 24. Please describe if medium or high impact of GLH/GMS                                                                                                                               | Overall |            |
|---------------------------------------------------------------------------------------------------------------------------------------------------------------------------------------|---------|------------|
|                                                                                                                                                                                       | n       | % (N = 15) |
| Negative                                                                                                                                                                              | /       | /          |
| Technical (Higher tissue quality requirements, High failure rates, incomplete testing)                                                                                                | 3       |            |
| Logistics (Funding issues, TAT, increase resource requirements, increased admin, poor compatibility with IT, pathway not streamlined and further from patient, lack of collaboration) | 12      |            |
| NA                                                                                                                                                                                    |         |            |
| Positive                                                                                                                                                                              | /       | /          |
| Technical (Improved TAT due to new NGS locally, Improved failure rates, Higher sequence coverage)                                                                                     | 2       |            |
| Logistics (Funding, efficiency/streamlined pathway, communication)                                                                                                                    | 5       |            |
| NA                                                                                                                                                                                    |         |            |

26. What impact will the roll out of the GMS and GLH had on your future services (positive and/ornegative)?

| 26. What impact will the roll out of the GMS and GLH had on your future services (positive and/ornegative)? | Overall |            |
|-------------------------------------------------------------------------------------------------------------|---------|------------|
|                                                                                                             | n       | % (N = 12) |
| High impact                                                                                                 | 8       | 67%        |
| Minimal or no impact                                                                                        | 3       | 25%        |
| N/A                                                                                                         | 1       | 8%         |

|     |   |   |
|-----|---|---|
| NA. | 3 | - |
|-----|---|---|

## 26. Please describe

| 26. Please describe                                                                                                                          | Overall |            |
|----------------------------------------------------------------------------------------------------------------------------------------------|---------|------------|
|                                                                                                                                              | n       | % (N = 15) |
| Negative - Administrative burden, inefficient reporting                                                                                      | 1       | 7%         |
| Negative - Division of pathology and genomics, Longer TAT, Higher tissue quality requirements, Administrative burden                         | 1       | 7%         |
| Negative - Longer TAT                                                                                                                        | 1       | 7%         |
| Negative - Longer TAT (Lung + Melanoma)                                                                                                      | 1       | 7%         |
| Negative - Longer TAT, Lack of guidance, May need to find alternatives to GLH / Positive - In melanoma could improve diagnosis and prognosis | 1       | 7%         |
| Negative - Service not streamlined, Funding concerns                                                                                         | 1       | 7%         |
| N/A                                                                                                                                          | 1       | 7%         |
| Positive - Increased use of GLH, More capacity locally for urgent samples                                                                    | 1       | 7%         |
| Positive - Reduced workload, More capacity for urgent samples, Complex cases being handled by GLH                                            | 1       | 7%         |
| Positive - Will overcome sample quantity constraints / Negative - Logistical burden                                                          | 1       | 7%         |
| Unsure                                                                                                                                       | 4       | 27%        |
| Unsure / Positive - Save money, Standardise results                                                                                          | 1       | 7%         |
| NA.                                                                                                                                          | 0       | -          |

| 24. Please describe if medium or high impact of GLH/GMS                                                                                | Overall |            |
|----------------------------------------------------------------------------------------------------------------------------------------|---------|------------|
|                                                                                                                                        | n       | % (N = 15) |
| Negative                                                                                                                               | /       | /          |
| Technical (higher tissue requirements)                                                                                                 | 1       |            |
| Logistics (additional admin, inefficient reporting, deviation of pathway, longer turnaround times, lack of guidance, funding concerns) | 7       |            |
| Positive                                                                                                                               | /       | /          |
| Technical                                                                                                                              | 0       |            |
| Logistics (more capacity locally for urgent samples, reduced workload)                                                                 | 4       |            |
| Other                                                                                                                                  | 1       |            |
| Unsure                                                                                                                                 | 5       | 33%        |
| N/A                                                                                                                                    | 1       | 7%         |

## 27. Sample Preparation

| 27. Sample Preparation | Overall |            |
|------------------------|---------|------------|
|                        | n       | % (N = 15) |
| No                     | 2       | 13%        |
| Yes                    | 13      | 87%        |
| NA.                    | 0       | -          |

## 27. Test assignment (reflexive)

| 27. Test assignment (reflexive) | Overall |            |
|---------------------------------|---------|------------|
|                                 | n       | % (N = 15) |
| No                              | 3       | 20%        |
| Yes                             | 12      | 80%        |
| NA.                             | 0       | -          |

## 27. Conducting testing: All

| 27. Conducting testing: All | Overall |            |
|-----------------------------|---------|------------|
|                             | n       | % (N = 15) |
| No                          | 8       | 53%        |
| Yes                         | 7       | 47%        |
| NA.                         | 0       | -          |

## 27. Conducting testing: Cellular

| 27. Conducting testing: Cellular | Overall |            |
|----------------------------------|---------|------------|
|                                  | n       | % (N = 15) |
| No                               | 7       | 47%        |
| Yes                              | 8       | 53%        |
| NA.                              | 0       | -          |

## 27. Conducting testing: Salvage

| 27. Conducting testing: Salvage | Overall |            |
|---------------------------------|---------|------------|
|                                 | n       | % (N = 15) |
| No                              | 8       | 53%        |
| Yes                             | 7       | 47%        |
| NA.                             | 0       | -          |

## 27. Conducting testing: Urgent or first line testing

| 27. Conducting testing: Urgent or first line testing | Overall |            |
|------------------------------------------------------|---------|------------|
|                                                      | n       | % (N = 15) |
| No                                                   | 4       | 27%        |
| Yes                                                  | 11      | 73%        |
| NA.                                                  | 0       | -          |

## 27. Data analysis

| 27. Data analysis | Overall |            |
|-------------------|---------|------------|
|                   | n       | % (N = 15) |
| No                | 6       | 40%        |
| Yes               | 9       | 60%        |
| NA.               | 0       | -          |

## 27. Report creation

| 27. Report creation | Overall |            |
|---------------------|---------|------------|
|                     | n       | % (N = 15) |
| No                  | 4       | 27%        |
| Yes                 | 11      | 73%        |
| NA.                 | 0       | -          |

## 27. Education Training

| 27. Education Training | Overall |            |
|------------------------|---------|------------|
|                        | n       | % (N = 15) |
| No                     | 2       | 13%        |



|     |    |     |
|-----|----|-----|
| Yes | 13 | 87% |
| NA. | 0  | -   |

27. Where do you see the role of regional pathology centres in the optimal delivery of the GMS?

Other

| Other                                                         | Overall |           |
|---------------------------------------------------------------|---------|-----------|
|                                                               | n       | % (N = 3) |
| Integrate diagnostic information from different sources       | 1       | 33%       |
| Providing prognostic and predictive factors on a timely basis | 1       | 33%       |
| Role unclear                                                  | 1       | 33%       |
| NA.                                                           | 12      | -         |

28. How do you currently work with your GLH? i.e. access to tissue, sample preparation, salvage/urgent testing, preparation of reports, etc.

| 28. How do you currently work with your GLH? i.e. access to tissue, sample preparation, salvage/urgent testing, preparation of reports, etc.   | Overall |            |
|------------------------------------------------------------------------------------------------------------------------------------------------|---------|------------|
|                                                                                                                                                | n       | % (N = 13) |
| Collaborate on issues                                                                                                                          | 1       | 8%         |
| Collaboration on region wide issues, Testing, Test development / provide validation set for new indications, Report generation and integration | 1       | 8%         |
| None                                                                                                                                           | 1       | 8%         |
| Pathology integrates GLH report into their local reporting system                                                                              | 1       | 8%         |
| Prepare tissue sections / samples for GLH, GLH provides molecular report                                                                       | 2       | 15%        |
| Prepare tissue sections / samples for GLH, GLH provides molecular report, Pathology to input report on local system                            | 2       | 15%        |
| Prepare tissue sections / samples for GLH, Urgent testing 1L, Training GLH scientists                                                          | 1       | 8%         |
| Request test, Prepare tissue sections / samples for GLH, GLH provides molecular report                                                         | 1       | 8%         |
| Request test, prepare tissue sections / samples for GLH, GLH provides molecular report, Collaborate on issues                                  | 1       | 8%         |
| Request test, Prepare tissue sections / samples for GLH, GLH provides molecular report, Pathology authorise the final report                   | 1       | 8%         |
| Request testing, Prepare tissue sections / samples for GLH, GLH provides molecular report                                                      | 1       | 8%         |
| NA.                                                                                                                                            | 2       | -          |

28. How do you currently work with your GLH? i.e. access to tissue, sample preparation, salvage/urgent testing, preparation of reports, etc.

| 28. How do you currently work with your GLH? i.e. access to tissue, sample preparation, salvage/urgent testing, preparation of reports, etc. | Overall |            |
|----------------------------------------------------------------------------------------------------------------------------------------------|---------|------------|
|                                                                                                                                              | n       | % (N = 13) |
| Collaborate on issues                                                                                                                        | 3       | 23%        |
| Test development / provide validation set for new indications                                                                                | 1       | 8%         |
| Report generation and integration                                                                                                            | 1       | 8%         |
| Pathology integrates GLH report into their local reporting system                                                                            | 1       | 8%         |
| Prepare tissue sections / samples for GLH                                                                                                    | 9       | 69%        |
| GLH provides molecular report                                                                                                                | 8       | 62%        |
| Pathology to input report on local system                                                                                                    | 1       | 8%         |
| Urgent testing 1L                                                                                                                            | 1       | 8%         |
| Training GLH scientists                                                                                                                      | 1       | 8%         |
| Request test                                                                                                                                 | 4       | 31%        |
| Pathology authorise the final report                                                                                                         | 1       | 8%         |
| Testing                                                                                                                                      | 1       | 8%         |
| None                                                                                                                                         | 1       | 8%         |
| NA.                                                                                                                                          | 2       | -          |

\* Categories not mutually exclusive

29. Sample Quality

| 29. Sample Quality   | Overall |            |
|----------------------|---------|------------|
|                      | n       | % (N = 15) |
| High impact          | 7       | 47%        |
| Medium impact        | 5       | 33%        |
| Minimal or no impact | 3       | 20%        |
| NA.                  | 0       | -          |

29. Transportation

| 29. Transportation   | Overall |            |
|----------------------|---------|------------|
|                      | n       | % (N = 15) |
| High impact          | 5       | 33%        |
| Medium impact        | 3       | 20%        |
| Minimal or no impact | 7       | 47%        |
| NA.                  | 0       | -          |

29. Ordering GLH tests

| 29. Ordering GLH tests | Overall |            |
|------------------------|---------|------------|
|                        | n       | % (N = 15) |
| High impact            | 1       | 7%         |
| Medium impact          | 4       | 27%        |
| Minimal or no impact   | 9       | 60%        |
| Not applicable         | 1       | 7%         |
| NA.                    | 0       | -          |

29. Admin

| 29. Admin            | Overall |            |
|----------------------|---------|------------|
|                      | n       | % (N = 15) |
| High impact          | 6       | 40%        |
| Medium impact        | 5       | 33%        |
| Minimal or no impact | 4       | 27%        |
| NA.                  | 0       | -          |

29. Testing options/capabilities

| 29. Testing options/capabilities | Overall |            |
|----------------------------------|---------|------------|
|                                  | n       | % (N = 15) |
| High impact                      | 6       | 40%        |
| Medium impact                    | 2       | 13%        |
| Minimal or no impact             | 5       | 33%        |
| Not applicable                   | 2       | 13%        |
| NA.                              | 0       | -          |

29. Data analysis/ bioinformatics

| 29. Data analysis/ bioinformatics | Overall |            |
|-----------------------------------|---------|------------|
|                                   | n       | % (N = 14) |
| High impact                       | 2       | 14%        |
| Medium impact                     | 2       | 14%        |

|                      |   |     |
|----------------------|---|-----|
| Minimal or no impact | 7 | 50% |
| Not applicable       | 3 | 21% |
| NA.                  | 1 | -   |

## 29. IT requirements/ compatibility

| 29. IT requirements/ compatibility | Overall |            |
|------------------------------------|---------|------------|
|                                    | n       | % (N = 15) |
| High impact                        | 5       | 33%        |
| Medium impact                      | 6       | 40%        |
| Minimal or no impact               | 3       | 20%        |
| Not applicable                     | 1       | 7%         |
| NA.                                | 0       | -          |

## 29. Reporting

| 29. Reporting        | Overall |            |
|----------------------|---------|------------|
|                      | n       | % (N = 14) |
| High impact          | 1       | 7%         |
| Medium impact        | 5       | 36%        |
| Minimal or no impact | 8       | 57%        |
| NA.                  | 1       | -          |

## 29. Education/training

| 29. Education/training | Overall |            |
|------------------------|---------|------------|
|                        | n       | % (N = 15) |
| High impact            | 2       | 13%        |
| Medium impact          | 6       | 40%        |
| Minimal or no impact   | 6       | 40%        |
| Not applicable         | 1       | 7%         |
| NA.                    | 0       | -          |

## 29. Resource/Capacity

| 29. Resource/Capacity | Overall |            |
|-----------------------|---------|------------|
|                       | n       | % (N = 15) |
| High impact           | 7       | 47%        |
| Medium impact         | 7       | 47%        |
| Minimal or no impact  | 1       | 7%         |
| NA.                   | 0       | -          |

## 29. Funding

| 29. Funding          | Overall |            |
|----------------------|---------|------------|
|                      | n       | % (N = 15) |
| High impact          | 7       | 47%        |
| Medium impact        | 4       | 27%        |
| Minimal or no impact | 3       | 20%        |
| Not applicable       | 1       | 7%         |
| NA.                  | 0       | -          |

## 29. What do you see as the current barriers to optimal delivery of the GMS?

Other

| 29. What do you see as the current barriers to optimal delivery of the GMS? | Overall |           |
|-----------------------------------------------------------------------------|---------|-----------|
|                                                                             | n       | % (N = 5) |
| Other                                                                       |         |           |
| Communication                                                               | 1       | 20%       |
| Pathology having control/ pathway integration - high impact                 | 1       | 20%       |
| Poor service (no access)                                                    | 1       | 20%       |
| Recognition                                                                 | 1       | 20%       |
| TATS - High impact                                                          | 1       | 20%       |
| NA.                                                                         | 10      | -         |

## 30. Do you have other concerns regarding the delivery of this service?

| 30. Do you have other concerns regarding the delivery of this service? | Overall |            |
|------------------------------------------------------------------------|---------|------------|
|                                                                        | n       | % (N = 15) |
| No                                                                     | 5       | 33%        |
| Yes                                                                    | 10      | 67%        |
| NA.                                                                    | 0       | -          |

## 30. Do you have other concerns regarding the delivery of this service?

| 30. Do you have other concerns regarding the delivery of this service?                                                                | Overall |            |
|---------------------------------------------------------------------------------------------------------------------------------------|---------|------------|
|                                                                                                                                       | n       | % (N = 11) |
| Funding, TAT                                                                                                                          | 1       | 9%         |
| Insufficient training on GLH, <b>New technology implementation</b>                                                                    | 1       | 9%         |
| <b>Outdated technology</b> , Inefficient service                                                                                      | 1       | 9%         |
| Poor communication, <b>Service not flexible</b>                                                                                       | 1       | 9%         |
| Resource, Capacity, Collaboration                                                                                                     | 1       | 9%         |
| Service moving further from patient, Pathway not streamlined, More collaboration and <b>flexibility required</b>                      | 1       | 9%         |
| Service moving further from patient, TAT, Sample flow not streamlined, Pathway not streamlined, <b>Service not flexible</b>           | 1       | 9%         |
| TAT, Pathway not streamlined                                                                                                          | 1       | 9%         |
| TAT, Pathway not streamlined, Poor communication, Poor collaboration, Need for clear procedures, Need for clear interpretable reports | 1       | 9%         |
| TAT, Workload, Heterogeneity across GLHS                                                                                              | 1       | 9%         |
| Uneven experience and expertise across network, <b>Failure rates</b>                                                                  | 1       | 9%         |
| NA.                                                                                                                                   | 4       | -          |

| 24. Please describe if medium or high impact of GLH/GMS                                                                                                                                                                       | Overall |            |
|-------------------------------------------------------------------------------------------------------------------------------------------------------------------------------------------------------------------------------|---------|------------|
|                                                                                                                                                                                                                               | n       | % (N = 11) |
| Technical (implementation of new technology, outdated technology, failure rates)                                                                                                                                              | 3       |            |
| Logistics (Funding, TAT, insufficient training, poor communication, capacity, lack of collaboration, pathway not streamlined, lack of clarity of pathway and roles, heterogeneity in experience and expertise across network) | 10      |            |
| Other                                                                                                                                                                                                                         | 4       |            |
| NA                                                                                                                                                                                                                            | 4       |            |

31. What additional resources are required at local pathology labs to support optimal delivery of this service?

| 31. What additional resources are required at local pathology labs to support optimal delivery of this service?                | Overall |            |
|--------------------------------------------------------------------------------------------------------------------------------|---------|------------|
|                                                                                                                                | n       | % (N = 14) |
| Additional staff (Admin)                                                                                                       | 1       | 7%         |
| Additional staff (Admin, Scientist), Additional sample prep resource                                                           | 1       | 7%         |
| Additional staff (Admin, Scientist), Improved IT efficiency (for sample tracking and reports), Improved communication with MDT | 1       | 7%         |
| Additional staff (Pathologists, Scientist)                                                                                     | 1       | 7%         |
| Additional staff (Pathologists, Admin, Scientist)                                                                              | 1       | 7%         |
| Additional staff (Pathologists, Scientist)                                                                                     | 1       | 7%         |
| Additional staff (Pathologists, Scientist), Improve communication and collaboration with GLH                                   | 1       | 7%         |
| Additional staff, Additional admin resource                                                                                    | 1       | 7%         |
| Educational support on sample suitability                                                                                      | 1       | 7%         |
| Funding for local testing, Additional staff (Pathologists)                                                                     | 1       | 7%         |
| Funding, Additional staff (Admin)                                                                                              | 1       | 7%         |
| More facilities                                                                                                                | 1       | 7%         |
| None                                                                                                                           | 2       | 14%        |
| NA                                                                                                                             | 1       | -          |

| 24. Please describe if medium or high impact of GLH/GMS | Overall |            |
|---------------------------------------------------------|---------|------------|
|                                                         | n       | % (N = 14) |
| Staffing                                                | 11      |            |
| Funding                                                 | 2       |            |
| Other                                                   |         |            |
| None                                                    | 2       |            |
| NA                                                      | 1       |            |

## Regional pathology centre - New treatment trial results

| Regional pathology centre -<br>New treatment trial results | Overall |            |
|------------------------------------------------------------|---------|------------|
|                                                            | n       | % (N = 15) |
| No                                                         | 4       | 27%        |
| Yes                                                        | 11      | 73%        |
| NA.                                                        | 0       | -          |

## Regional pathology centre - Optimal reporting

| Regional pathology centre - Optimal reporting | Overall |            |
|-----------------------------------------------|---------|------------|
|                                               | n       | % (N = 15) |
| No                                            | 4       | 27%        |
| Yes                                           | 11      | 73%        |
| NA.                                           | 0       | -          |

## Regional pathology centre - Guideline reviews/updates

| Regional pathology centre - Guideline reviews/updates | Overall |            |
|-------------------------------------------------------|---------|------------|
|                                                       | n       | % (N = 15) |
| No                                                    | 3       | 20%        |
| Yes                                                   | 12      | 80%        |
| NA.                                                   | 0       | -          |

## Regional pathology centre - Understanding the new molecular testing pathway

| Regional pathology centre - Understanding the new<br>molecular testing pathway | Overall |            |
|--------------------------------------------------------------------------------|---------|------------|
|                                                                                | n       | % (N = 15) |
| No                                                                             | 1       | 7%         |
| Yes                                                                            | 14      | 93%        |
| NA.                                                                            | 0       | -          |

## Regional pathology centre - Best practice sharing across lab

| Regional pathology centre -<br>Best practice sharing across lab | Overall |            |
|-----------------------------------------------------------------|---------|------------|
|                                                                 | n       | % (N = 15) |
| No                                                              | 1       | 7%         |
| Yes                                                             | 14      | 93%        |
| NA.                                                             | 0       | -          |

Regional pathology centre - Cross-functional education  
with clinicians

| Regional pathology centre -<br>Cross-functional education with clinicians | Overall |            |
|---------------------------------------------------------------------------|---------|------------|
|                                                                           | n       | % (N = 15) |
| No                                                                        | 3       | 20%        |
| Yes                                                                       | 12      | 80%        |
| NA.                                                                       | 0       | -          |

Regional pathology centre - Other

| Regional pathology centre -<br>Other      | Overall |            |
|-------------------------------------------|---------|------------|
|                                           | n       | % (N = 15) |
| Development and support of molecular MDTs | 1       | 7%         |
| New molecular markers                     | 1       | 7%         |
| No                                        | 13      | 87%        |
| NA.                                       | 0       | -          |

DGH pathology labs - New treatment trial results

| DGH pathology labs -<br>New treatment trial results | Overall |            |
|-----------------------------------------------------|---------|------------|
|                                                     | n       | % (N = 15) |
| No                                                  | 7       | 47%        |
| Yes                                                 | 8       | 53%        |
| NA.                                                 | 0       | -          |

DGH pathology labs - Optimal reporting

| DGH pathology labs -<br>Optimal reporting | Overall |            |
|-------------------------------------------|---------|------------|
|                                           | n       | % (N = 15) |
| No                                        | 7       | 47%        |

|     |   |     |
|-----|---|-----|
| Yes | 8 | 53% |
| NA. | 0 | -   |

DGH pathology labs - Guideline reviews/updates

| DGH pathology labs - Guideline reviews/updates | Overall |            |
|------------------------------------------------|---------|------------|
|                                                | n       | % (N = 15) |
| No                                             | 7       | 47%        |
| Yes                                            | 8       | 53%        |
| NA.                                            | 0       | -          |

DGH pathology labs - Understanding the new molecular testing pathway

| DGH pathology labs - Understanding the new molecular testing pathway | Overall |            |
|----------------------------------------------------------------------|---------|------------|
|                                                                      | n       | % (N = 15) |
| No                                                                   | 5       | 33%        |
| Yes                                                                  | 10      | 67%        |
| NA.                                                                  | 0       | -          |

DGH pathology labs - Best practice sharing across lab

| DGH pathology labs - Best practice sharing across lab | Overall |            |
|-------------------------------------------------------|---------|------------|
|                                                       | n       | % (N = 15) |
| No                                                    | 5       | 33%        |
| Yes                                                   | 10      | 67%        |
| NA.                                                   | 0       | -          |

DGH pathology labs - Cross-functional education with clinicians

| DGH pathology labs - Cross-functional education with clinicians | Overall |            |
|-----------------------------------------------------------------|---------|------------|
|                                                                 | n       | % (N = 15) |
| No                                                              | 7       | 47%        |
| Yes                                                             | 8       | 53%        |
| NA.                                                             | 0       | -          |

## DGH pathology labs - Other

| DGH pathology labs - Other                | Overall |            |
|-------------------------------------------|---------|------------|
|                                           | n       | % (N = 15) |
| Development and support of molecular MDTs | 1       | 7%         |
| importance of tissue stewardship          | 1       | 7%         |
| No                                        | 13      | 87%        |
| NA.                                       | 0       | -          |

## Surgeons - Interpreting reports/results

| Surgeons - Interpreting reports/results | Overall |            |
|-----------------------------------------|---------|------------|
|                                         | n       | % (N = 15) |
| No                                      | 9       | 60%        |
| Yes                                     | 6       | 40%        |
| NA.                                     | 0       | -          |

## Surgeons - Overview of different types of tests

| Surgeons - Overview of different types of tests | Overall |            |
|-------------------------------------------------|---------|------------|
|                                                 | n       | % (N = 15) |
| No                                              | 7       | 47%        |
| Yes                                             | 8       | 53%        |
| NA.                                             | 0       | -          |

## Surgeons - Tissue requirements

| Surgeons - Tissue requirements | Overall |            |
|--------------------------------|---------|------------|
|                                | n       | % (N = 15) |
| No                             | 5       | 33%        |
| Yes                            | 10      | 67%        |
| NA.                            | 0       | -          |

## Surgeons - Patient information – testing and results

| Surgeons - Patient information – testing and results | Overall |            |
|------------------------------------------------------|---------|------------|
|                                                      | n       | % (N = 15) |
| No                                                   | 4       | 27%        |
| Yes                                                  | 11      | 73%        |
| NA.                                                  | 0       | -          |

## Surgeons - Other



| Surgeons -<br>Other        | Overall |            |
|----------------------------|---------|------------|
|                            | n       | % (N = 15) |
| new tests for neo/adjuvant | 1       | 7%         |
| No                         | 14      | 93%        |
| NA.                        | 0       | -          |

## CNS - Interpreting reports/results

| CNS -<br>Interpreting reports/results | Overall |            |
|---------------------------------------|---------|------------|
|                                       | n       | % (N = 15) |
| No                                    | 5       | 33%        |
| Yes                                   | 10      | 67%        |
| NA.                                   | 0       | -          |

## CNS - Overview of different types of tests

| CNS -<br>Overview of different types of tests | Overall |            |
|-----------------------------------------------|---------|------------|
|                                               | n       | % (N = 15) |
| No                                            | 5       | 33%        |
| Yes                                           | 10      | 67%        |
| NA.                                           | 0       | -          |

## CNS - Tissue requirements

| CNS -<br>Tissue requirements | Overall |            |
|------------------------------|---------|------------|
|                              | n       | % (N = 15) |
| No                           | 6       | 40%        |
| Yes                          | 9       | 60%        |
| NA.                          | 0       | -          |

## CNS - Patient information – testing and results

| CNS -<br>Patient information – testing and results | Overall |            |
|----------------------------------------------------|---------|------------|
|                                                    | n       | % (N = 15) |
| No                                                 | 3       | 20%        |
| Yes                                                | 12      | 80%        |

|     |   |   |
|-----|---|---|
| NA. | 0 | - |
|-----|---|---|

## CNS - Other

| CNS - Other | Overall |            |
|-------------|---------|------------|
|             | n       | % (N = 15) |
| No          | 15      | 100%       |
| NA.         | 0       | -          |

## Clinicians - Interpreting reports/results

| Clinicians - Interpreting reports/results | Overall |            |
|-------------------------------------------|---------|------------|
|                                           | n       | % (N = 15) |
| No                                        | 4       | 27%        |
| Yes                                       | 11      | 73%        |
| NA.                                       | 0       | -          |

## Clinicians - Overview of different types of tests

| Clinicians - Overview of different types of tests | Overall |            |
|---------------------------------------------------|---------|------------|
|                                                   | n       | % (N = 15) |
| No                                                | 4       | 27%        |
| Yes                                               | 11      | 73%        |
| NA.                                               | 0       | -          |

## Clinicians - Tissue requirements

| Clinicians - Tissue requirements | Overall |            |
|----------------------------------|---------|------------|
|                                  | n       | % (N = 15) |
| No                               | 4       | 27%        |
| Yes                              | 11      | 73%        |
| NA.                              | 0       | -          |

## Clinicians - Patient information – testing and results

| Clinicians -<br>Patient information – testing and results | Overall |            |
|-----------------------------------------------------------|---------|------------|
|                                                           | n       | % (N = 15) |
| No                                                        | 2       | 13%        |
| Yes                                                       | 13      | 87%        |
| NA.                                                       | 0       | -          |

## Clinicians - Other

| Clinicians -<br>Other                                                                     | Overall |            |
|-------------------------------------------------------------------------------------------|---------|------------|
|                                                                                           | n       | % (N = 15) |
| Lab tours: Understanding of how pathology works,<br>requirements for planning the service | 1       | 7%         |
| No                                                                                        | 13      | 87%        |
| Understanding of what is being ordered                                                    | 1       | 7%         |
| NA.                                                                                       | 0       | -          |

## 34. Digital education

| 34. Digital education | Overall |            |
|-----------------------|---------|------------|
|                       | n       | % (N = 15) |
| No                    | 3       | 20%        |
| Yes                   | 12      | 80%        |
| NA.                   | 0       | -          |

## 34. Paper education

| 34. Paper education | Overall |            |
|---------------------|---------|------------|
|                     | n       | % (N = 15) |
| No                  | 11      | 73%        |
| Yes                 | 4       | 27%        |
| NA.                 | 0       | -          |

## 34. HCP Portal/Websites

| 34. HCP Portal/Websites | Overall |            |
|-------------------------|---------|------------|
|                         | n       | % (N = 15) |
| No                      | 9       | 60%        |
| Yes                     | 6       | 40%        |
| NA.                     | 0       | -          |

## 34. Educational Meetings: virtual

| 34. Educational Meetings: virtual | Overall |            |
|-----------------------------------|---------|------------|
|                                   | n       | % (N = 15) |
| No                                | 4       | 27%        |
| Yes                               | 11      | 73%        |
| NA.                               | 0       | -          |

## 34. Educational Meetings: in person

| 34. Educational Meetings: in person | Overall |            |
|-------------------------------------|---------|------------|
|                                     | n       | % (N = 15) |
| No                                  | 6       | 40%        |
| Yes                                 | 9       | 60%        |
| NA.                                 | 0       | -          |

## 34. Preceptorships

| 34. Preceptorships | Overall |            |
|--------------------|---------|------------|
|                    | n       | % (N = 15) |
| No                 | 11      | 73%        |
| Yes                | 4       | 27%        |
| NA.                | 0       | -          |
