# Supplementary material for: Landscape of cancer biomarker testing in England following genomic services reconfiguration: insights from a nationwide pathologist survey
Source: PubMed Central journal article supplement — J Clin Pathol. 2023 May 31;77(7):486–94. doi: 10.1136/jcp-2023-208890 (PMC11228219; doi:10.1136/jcp-2023-208890), 2023-05-31
Supplement: jcp-2023-208890supp003.pdf [file jcp-2023-208890supp003.pdf]

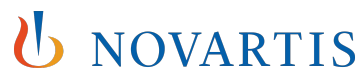

# PATHways UK 2021

## Understanding Current Challenges in Oncology Molecular Pathways in the UK

This market research study is organised and funded by Novartis Pharmaceuticals UK Ltd

### Introduction

The purpose of this nationwide survey is to gain a better understanding of the current services and challenges for cancer diagnostics in UK pathology laboratories.

With recent events impacting the patient oncology diagnostic pathway, including impact of COVID-19 and the centralisation of molecular services to Genomic Laboratory Hubs, this study is designed to capture key points on current and evolving molecular pathology services and pathways with a specific focus on molecular testing in Melanoma, Breast and Lung Cancer.

In particular, we aim to highlight the barriers and challenges that may exist for pathology laboratories in providing, and areas requiring further support that may help enable, a diagnostic infrastructure supporting optimal patient management.

Please note, the results are anonymised and will be aggregated together with the responses of other participants. Your responses will therefore not be attributable to you as an individual or center and you will not be identifiable.

### Respondent Profile

1. **Responder ID (to be completed by Novartis Associate)** .....

2. **Where in the UK is your Lab?**

England  Scotland  Wales  Northern Ireland

3. **How would you categorise your hospital?**

District General  Regional Centre  Other

**4. What region does your lab cover for diagnosis and management of cancer samples?**

Local only  Referral network

Estimated populations size: .....

**5. Which is your regional GLH or genomics centre?**

Central & South GLH  East GLH  North West GLH  North Thames GLH  South East GLH  South West GLH  North East & Yorkshire GLH

Scottish Genetics Consortium: Glasgow  Edinburgh  Aberdeen  Dundee

All Wales Medical Genomics Service (Cardiff)

Precision Medicine Centre (Belfast)

**6. Which technologies do you currently use at your lab?**

IHC  FISH  RT-PCR  Sanger Sequencing  NGS

Other .....

**Testing for Specific Cancers of Interest**

**7. Can you provide an estimate of the number of samples you receive per month for each of the following:**

Breast  Lung  Melanoma Skin  Other Cancers

**8. For breast cancer, what is the current status of the following tests within your lab?**

| Test          | Reflex at diagnosis<br>Y/N/On request | Testing at progression/<br>relapse/<br>other post Dx<br>timepoints<br>Reflex/On request/No | Performed by pathology lab<br>Y/N | Moved to GLH/<br>Genomic centre<br>Y/N | Moving to GLH/<br>Genomic hubs<br>Y*/N<br>*include timeframe if known | Current Average Turnaround time<br>(calendar days) | Additional Notes |
|---------------|---------------------------------------|--------------------------------------------------------------------------------------------|-----------------------------------|----------------------------------------|-----------------------------------------------------------------------|----------------------------------------------------|------------------|
| <b>IHC</b>    |                                       |                                                                                            |                                   |                                        |                                                                       |                                                    |                  |
| HR            |                                       |                                                                                            |                                   |                                        |                                                                       |                                                    |                  |
| HER2          |                                       |                                                                                            |                                   |                                        |                                                                       |                                                    |                  |
| PGR           |                                       |                                                                                            |                                   |                                        |                                                                       |                                                    |                  |
| PD-L1         |                                       |                                                                                            |                                   |                                        |                                                                       |                                                    |                  |
| NTRKfus       |                                       |                                                                                            |                                   |                                        |                                                                       |                                                    |                  |
| <b>FISH</b>   |                                       |                                                                                            |                                   |                                        |                                                                       |                                                    |                  |
| HER2          |                                       |                                                                                            |                                   |                                        |                                                                       |                                                    |                  |
| NTRKfus       |                                       |                                                                                            |                                   |                                        |                                                                       |                                                    |                  |
| <b>RT-PCR</b> |                                       |                                                                                            |                                   |                                        |                                                                       |                                                    |                  |
| PIK3CA        |                                       |                                                                                            |                                   |                                        |                                                                       |                                                    |                  |

|               |  |  |  |  |  |  |  |
|---------------|--|--|--|--|--|--|--|
| BRCA1/2       |  |  |  |  |  |  |  |
| NTRKfus       |  |  |  |  |  |  |  |
| <b>NGS</b>    |  |  |  |  |  |  |  |
| PIK3CA        |  |  |  |  |  |  |  |
| HER2          |  |  |  |  |  |  |  |
| NTRKfus       |  |  |  |  |  |  |  |
| BRCA1/2       |  |  |  |  |  |  |  |
| <b>Others</b> |  |  |  |  |  |  |  |
|               |  |  |  |  |  |  |  |

**9. For lung cancer, what is the current status of the following tests within your lab?**

| Test          | Reflex at diagnosis<br>Y/N/On request | Testing at progression/<br>relapse/<br>other post Dx timepoints<br>Reflex/On request/No | Performed by pathology lab<br>Y/N | Moved to GLH/<br>Genomic centre<br>Y/N | Moving to GLH/<br>Genomic hubs<br>Y*/N<br>*include timeframe if known | Current Average Turnaround time<br>(calendar days) | Additional Notes |
|---------------|---------------------------------------|-----------------------------------------------------------------------------------------|-----------------------------------|----------------------------------------|-----------------------------------------------------------------------|----------------------------------------------------|------------------|
| <b>IHC</b>    |                                       |                                                                                         |                                   |                                        |                                                                       |                                                    |                  |
| PD-L1         |                                       |                                                                                         |                                   |                                        |                                                                       |                                                    |                  |
| ROS1fus       |                                       |                                                                                         |                                   |                                        |                                                                       |                                                    |                  |
| ALKfus        |                                       |                                                                                         |                                   |                                        |                                                                       |                                                    |                  |
| BRAF          |                                       |                                                                                         |                                   |                                        |                                                                       |                                                    |                  |
| NTRKfus       |                                       |                                                                                         |                                   |                                        |                                                                       |                                                    |                  |
| <b>FISH</b>   |                                       |                                                                                         |                                   |                                        |                                                                       |                                                    |                  |
| ALKfus        |                                       |                                                                                         |                                   |                                        |                                                                       |                                                    |                  |
| ROS1fus       |                                       |                                                                                         |                                   |                                        |                                                                       |                                                    |                  |
| METamp        |                                       |                                                                                         |                                   |                                        |                                                                       |                                                    |                  |
| HER2amp       |                                       |                                                                                         |                                   |                                        |                                                                       |                                                    |                  |
| RETfus        |                                       |                                                                                         |                                   |                                        |                                                                       |                                                    |                  |
| NTRKfus       |                                       |                                                                                         |                                   |                                        |                                                                       |                                                    |                  |
| <b>RT-PCR</b> |                                       |                                                                                         |                                   |                                        |                                                                       |                                                    |                  |
| EGFR          |                                       |                                                                                         |                                   |                                        |                                                                       |                                                    |                  |
| ROS1fus       |                                       |                                                                                         |                                   |                                        |                                                                       |                                                    |                  |
| ALKfus        |                                       |                                                                                         |                                   |                                        |                                                                       |                                                    |                  |
| ALK           |                                       |                                                                                         |                                   |                                        |                                                                       |                                                    |                  |
| BRAF          |                                       |                                                                                         |                                   |                                        |                                                                       |                                                    |                  |
| KRAS          |                                       |                                                                                         |                                   |                                        |                                                                       |                                                    |                  |
| METex14       |                                       |                                                                                         |                                   |                                        |                                                                       |                                                    |                  |
| HER2          |                                       |                                                                                         |                                   |                                        |                                                                       |                                                    |                  |
| RETfus        |                                       |                                                                                         |                                   |                                        |                                                                       |                                                    |                  |
| NTRKfus       |                                       |                                                                                         |                                   |                                        |                                                                       |                                                    |                  |
| <b>NGS</b>    |                                       |                                                                                         |                                   |                                        |                                                                       |                                                    |                  |
| EGFR          |                                       |                                                                                         |                                   |                                        |                                                                       |                                                    |                  |
| ROS1fus       |                                       |                                                                                         |                                   |                                        |                                                                       |                                                    |                  |
| ALKfus        |                                       |                                                                                         |                                   |                                        |                                                                       |                                                    |                  |
| BRAF          |                                       |                                                                                         |                                   |                                        |                                                                       |                                                    |                  |

|               |  |  |  |  |  |  |  |
|---------------|--|--|--|--|--|--|--|
| KRAS          |  |  |  |  |  |  |  |
| METex14       |  |  |  |  |  |  |  |
| HER2          |  |  |  |  |  |  |  |
| RETfus        |  |  |  |  |  |  |  |
| NTRKfus       |  |  |  |  |  |  |  |
| <b>Others</b> |  |  |  |  |  |  |  |
|               |  |  |  |  |  |  |  |

**10. For melanoma, what is the current status of the following tests within your lab?**

| Test                     | Reflex at diagnosis<br>Y/N/On request | Testing at progression/relapse/other post Dx timepoints<br><br>Reflex/On request/No | Performed by pathology lab<br><br>Y/N | Moved to GLH/ Genomic centre<br><br>Y/N | Moving to GLH/ Genomic hubs<br><br>Y*/N<br>*include timeframe if known | Current Average Turnaround time<br><br>(receipt of sample to results reported - calendar days) | Additional Notes |
|--------------------------|---------------------------------------|-------------------------------------------------------------------------------------|---------------------------------------|-----------------------------------------|------------------------------------------------------------------------|------------------------------------------------------------------------------------------------|------------------|
| <b>IHC</b>               |                                       |                                                                                     |                                       |                                         |                                                                        |                                                                                                |                  |
| BRAF                     |                                       |                                                                                     |                                       |                                         |                                                                        |                                                                                                |                  |
| PD-L1                    |                                       |                                                                                     |                                       |                                         |                                                                        |                                                                                                |                  |
| <b>Sanger sequencing</b> |                                       |                                                                                     |                                       |                                         |                                                                        |                                                                                                |                  |
| BRAF                     |                                       |                                                                                     |                                       |                                         |                                                                        |                                                                                                |                  |
| NRAS                     |                                       |                                                                                     |                                       |                                         |                                                                        |                                                                                                |                  |
| <b>Pyrosequencing</b>    |                                       |                                                                                     |                                       |                                         |                                                                        |                                                                                                |                  |
| BRAF                     |                                       |                                                                                     |                                       |                                         |                                                                        |                                                                                                |                  |
| <b>RT-PCR</b>            |                                       |                                                                                     |                                       |                                         |                                                                        |                                                                                                |                  |
| BRAF                     |                                       |                                                                                     |                                       |                                         |                                                                        |                                                                                                |                  |
| NRAS                     |                                       |                                                                                     |                                       |                                         |                                                                        |                                                                                                |                  |
| KIT                      |                                       |                                                                                     |                                       |                                         |                                                                        |                                                                                                |                  |
| <b>NGS</b>               |                                       |                                                                                     |                                       |                                         |                                                                        |                                                                                                |                  |
| BRAF                     |                                       |                                                                                     |                                       |                                         |                                                                        |                                                                                                |                  |
| NRAS                     |                                       |                                                                                     |                                       |                                         |                                                                        |                                                                                                |                  |
| KIT                      |                                       |                                                                                     |                                       |                                         |                                                                        |                                                                                                |                  |
| <b>Others</b>            |                                       |                                                                                     |                                       |                                         |                                                                        |                                                                                                |                  |
|                          |                                       |                                                                                     |                                       |                                         |                                                                        |                                                                                                |                  |

**11. Please answer the following questions regarding your process for managing urgent samples?**

- a. What is the selection of tests used for the following types of cancer:
  - i. Breast Cancer: HR  PGR  HER2  Other ..... N/A
  - ii. Lung Cancer: PD-L1  EGFR  ALK  BRAF  ROS1  RET   
Other..... N/A
  - iii. Melanoma: BRAF  Other..... N/A
  
- b. Are these all performed in house? i.e. at your regional pathology centre. If not, where are they performed?  
Yes  No  :.....
  
- c. For molecular testing, which technology is preferred? (Select one)  
IHC  RT-PCR  Other.....

- d. Who is funding this testing?  
NHS Trust  GLH  N/A
- e. Are samples also sent to GLH for NGS?  
Yes  No  N/A

**12. What percentage of samples you receive for the following cancers are urgent?**

Breast.....

Melanoma.....

Lung.....

**13. Please answer the following questions regarding the use of archival tissue:**

- a. Please describe the process for request of archival tissue: .  
.....  
.....
- b. Describe the specific challenges with archival tissue that may exists for Lung, Breast or Melanoma?.....  
.....  
.....
- c. What is the turnaround times from request to receipt of the tissue? (calendar days)
  - i. Breast .....
  - ii. Lung .....
  - iii. Melanoma .....
- d. What are the challenges with archival tissue for genomics at GLH?  
Sample quality   
Additional resource requirements   
Processing issues   
Transport   
Other .....

**14. Please answer the following questions regarding liquid biopsies:**

- a. Do you currently offer molecular testing of liquid biopsies at your lab?  
EGFR only  No
- b. Are there any other molecular liquid biopsies performed at your lab? If so, which one(s) and for which cancer types?  
No   
Yes :.....
- c. What do you foresee will be the use of liquid biopsy within the diagnostic pathway?  
For all testing   
In addition to tissue testing (same targets)   
If a suitable tissue sample is not available

- Upon progression only
- For specific tests only  i.e. ....
- For panel testing
- Not used

d. What are the challenges with liquid biopsies? .....

.....

.....

.....

**15. Are you currently developing any other molecular tests for Lung, Breast or Melanoma?**

Please describe .....

**Pathway and Logistics**

**16. What are the biggest difficulties with implementing a new test?**

- Timelines for implementation
- Test development
- Test validation
- Administration
- Funding/Resource allocation
- Communication
- Other .....

**17. Who is your point of contact within clinic?**

- Respiratory physicians/ Pulmonologists
- Surgeon
- Oncologist
- MDT coordinator
- Clinical nurse specialist
- Other .....

**18. Do you regularly attend MDT?**

Yes  No

**19. Do you discuss results at standard MDTs?**Yes  No **20. Do you have a molecular specific MDTs?**Yes  No **21. Who initiates the testing process?**Respiratory physicians/ Pulmonologists Surgeon Administrator Pathologist Clinical Scientist (genomics) Oncologist 

Other .....

**22. How do you communicate with clinicians? i.e. regarding how to access testing or to inform them of the availability of a new test?**Email Webpage Hospital Newsletter MDT meeting 

Other .....

**23. On your reports, is clinical interpretation of the molecular results provided with reference to published disease area management recommendations, and available targeted therapies?**No Yes Reference to published therapy area guidelines only Reference to available targeted therapies only 

Other .....

**Recent Changes****24. What impact has COVID-19 had on your current services?**Minimal or no impact  Medium impact  High impact 

Please describe if medium or high impact.....

**25. What impact has the roll out of the GMS and GLH had on your current services (positive and/or negative)?**Minimal or no impact  Medium impact  High impact  N/A 

Please describe .....

**26. What impact will the roll out of the GMS and GLH had on your future services (positive and/or negative)??**Minimal or no impact  Medium impact  High impact  N/A 

Please describe .....

**27. Where do you see the role of regional pathology centres in the optimal delivery of the GMS?**Sample preparation Test assignment (reflexive) Conducting testing: all  cellular  salvage  urgent or first line testing Data analysis Report creation Education/training 

Other .....

**28. How do you currently work with your GLH? i.e. access to tissue, sample preparation, salvage/urgent testing, preparation of reports, etc.**

Please describe .....

N/A **Barriers and Support****29. What do you see as the current barriers for optimal delivery of the GMS? Tick the relevant boxes.**



| Barrier                        | Minimal impact           | Medium impact            | High impact              | Not applicable           |
|--------------------------------|--------------------------|--------------------------|--------------------------|--------------------------|
| Sample Quality                 | <input type="checkbox"/> | <input type="checkbox"/> | <input type="checkbox"/> | <input type="checkbox"/> |
| Transportation                 | <input type="checkbox"/> | <input type="checkbox"/> | <input type="checkbox"/> | <input type="checkbox"/> |
| Ordering GLH tests             | <input type="checkbox"/> | <input type="checkbox"/> | <input type="checkbox"/> | <input type="checkbox"/> |
| Admin                          | <input type="checkbox"/> | <input type="checkbox"/> | <input type="checkbox"/> | <input type="checkbox"/> |
| Testing options/capabilities   | <input type="checkbox"/> | <input type="checkbox"/> | <input type="checkbox"/> | <input type="checkbox"/> |
| Data analysis/ bioinformatics  | <input type="checkbox"/> | <input type="checkbox"/> | <input type="checkbox"/> | <input type="checkbox"/> |
| IT requirements/ compatibility | <input type="checkbox"/> | <input type="checkbox"/> | <input type="checkbox"/> | <input type="checkbox"/> |
| Reporting                      | <input type="checkbox"/> | <input type="checkbox"/> | <input type="checkbox"/> | <input type="checkbox"/> |
| Education/training             | <input type="checkbox"/> | <input type="checkbox"/> | <input type="checkbox"/> | <input type="checkbox"/> |
| Resource/Capacity              | <input type="checkbox"/> | <input type="checkbox"/> | <input type="checkbox"/> | <input type="checkbox"/> |
| Funding                        | <input type="checkbox"/> | <input type="checkbox"/> | <input type="checkbox"/> | <input type="checkbox"/> |
| Other.....                     |                          |                          |                          |                          |

**30. Do you have other concerns regarding the delivery of this service?**

Yes  No

If yes please describe .....

**31. What additional resources are required at local pathology labs to support optimal delivery of this service?**

Please describe .....

**32. What educational support is needed for pathologists from different sites?**

| Topics                                          | Regional pathology centres | DGH pathology labs |
|-------------------------------------------------|----------------------------|--------------------|
| New treatment trial results                     |                            |                    |
| Optimal reporting                               |                            |                    |
| Guideline reviews/updates                       |                            |                    |
| Understanding the new molecular testing pathway |                            |                    |
| Best practice sharing across lab                |                            |                    |
| Cross-functional education with clinicians      |                            |                    |
| Other.....                                      |                            |                    |

**33. What educational support is needed for HCPs?**

| Topics                                    | Surgeons | CNS | Clinicians |
|-------------------------------------------|----------|-----|------------|
| Interpreting reports/results              |          |     |            |
| Overview of different types of tests      |          |     |            |
| Tissue requirements                       |          |     |            |
| Patient information – testing and results |          |     |            |
| Other.....                                |          |     |            |

**34. What type of education is preferred?**

Digital education

Paper education

HCP Portal/websites

Educational Meetings: virtual  in person

Preceptorships

Other .....

Thank you for taking the time to complete the survey

This market research study is organised and funded by Novartis Pharmaceuticals UK Ltd
